# Supplementary material for: Evidence for an Adaptation of a Phage-Derived Holin/Endolysin System to Toxin Transport in Clostridioides difficile
Source: PubMed Central journal article supplement (PMC6200909; doi:10.3389/fmicb.2018.02446), 2018-10-18
Supplement: Presentation_1.pdf [file Presentation_1.pdf]

## *Supplementary Material*

### **Evidence for an adaptation of a phage-derived holin/endolysin system to toxin transport in *Clostridioides difficile***

**Denise Mehner-Breitfeld<sup>1</sup>, Claudia Rathmann<sup>1</sup>, Thomas Riedel<sup>2,3</sup>, Ingo Just<sup>4</sup>, Ralf Gerhard<sup>4</sup>, Jörg Overmann<sup>2,3</sup>, and Thomas Brüser<sup>1\*</sup>**

<sup>1</sup>Institute of Microbiology, Leibniz Universität Hannover, Hannover, Germany

<sup>2</sup>Department of Microbial Ecology and Diversity Research, Leibniz Institute DSMZ-German Collection of Microorganisms and Cell Cultures, Braunschweig, Germany

<sup>3</sup>German Center for Infection Research (DZIF), Partner Site Hannover-Braunschweig, Braunschweig, Germany

<sup>4</sup>Institute of Toxicology, Hannover Medical School, Hannover, Germany

\* **Correspondence:** Thomas Brüser; [brueser@ifmb.uni-hannover.de](mailto:brueser@ifmb.uni-hannover.de)

#### **1 Supplementary Figures**

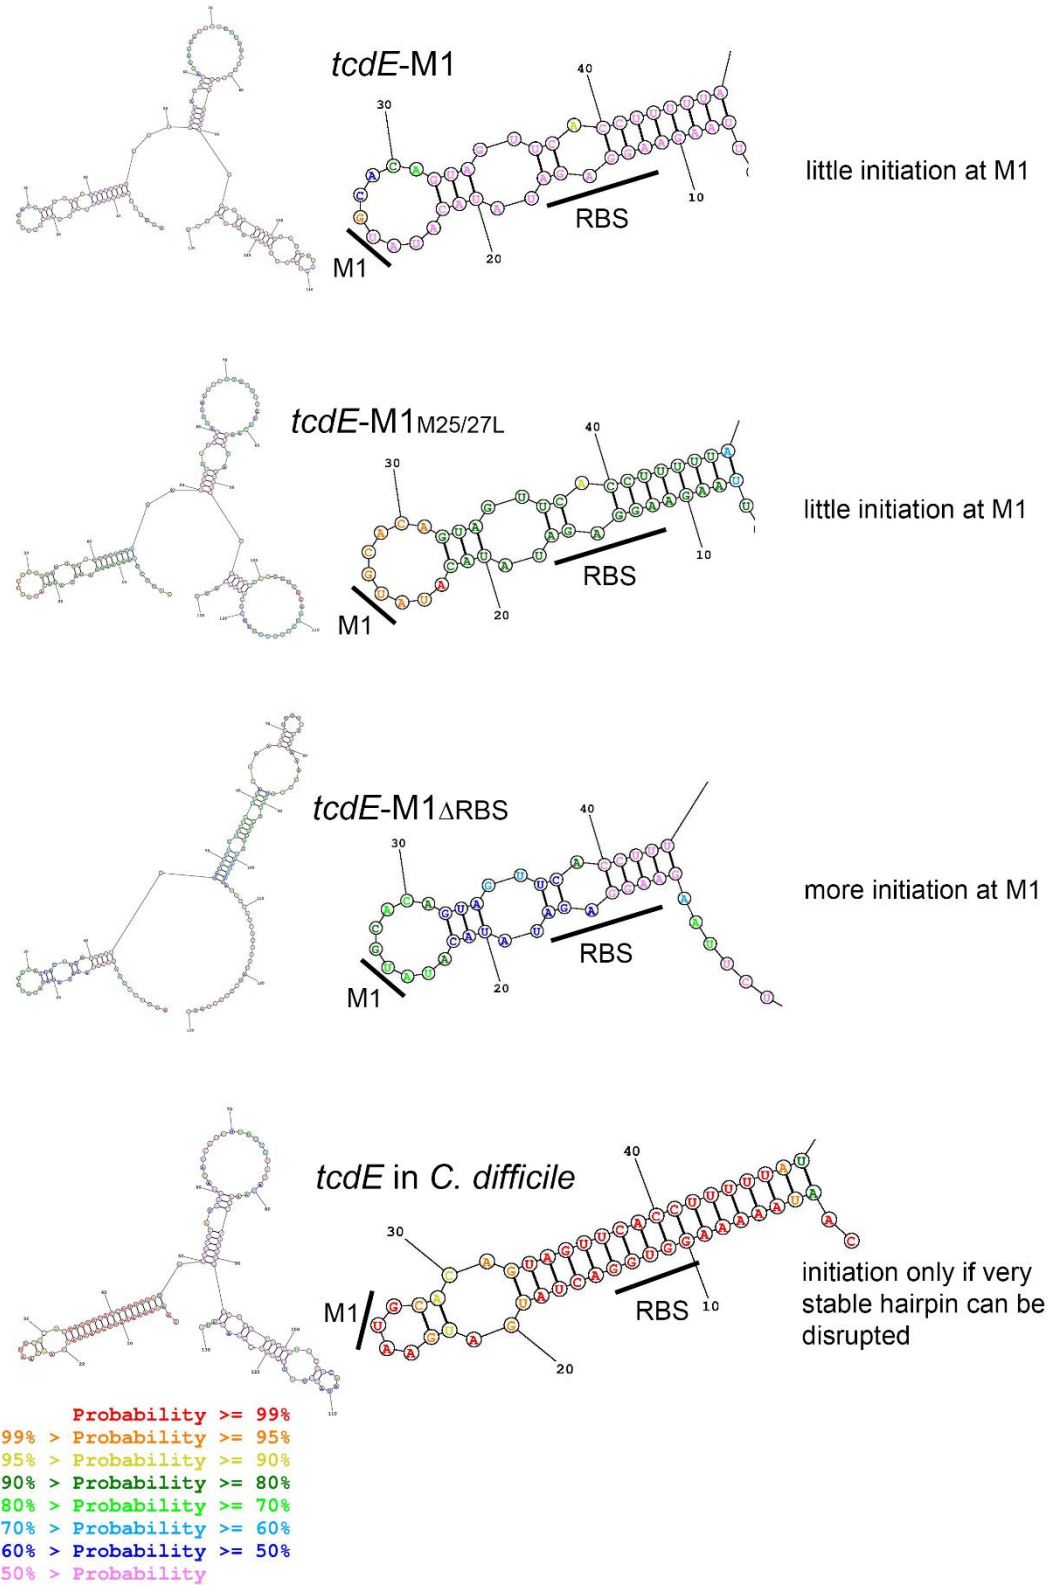

**Supplementary Figure S1.** Secondary structures around the M1 translational start codon in the analyzed constructs and in genomic *tcdE*. Analyses were carried out using the software RNAstructure (Reuter und Mathews 2010). Probabilities are color-coded as indicated at the bottom.



## 2 Supplementary Data

(A) Sequence alignment for all 44 analyzed sequences of the PaLoc region, ranging from the translational stop of *tcdB* to the translational start of *tcdA*. The alignment was generated using Clustal Omega (Sievers and Higgins, 2014). Mutations that are found in minorities of sequences are highlighted in blue. The positions of translational starts and stops are highlighted in yellow and indicated at the bottom of the sequences. (B) All analyzed sequences in FASTA format. Strain names are given as DSM numbers, except for strains of previously deposited sequences.

### (A)

```

M68          ATAAAAATATGTTAAATATATCCTCTTATACTTAAATATATAAAAAATAACAAAATGA      58
CF5          ATAAAAATATGTTAAATATATCCTCTTATACTTAAATATATAAAAAATAACAAAATGA      58
DSM 29095   ATAAAAATATGTTAAATATATCCTCTTATACTTAAATATATAAAAAATAACAAAATGA      58
DSM 29090   ATAAAAATATGTTAAATATATCCTCTTATACTTAAATATATAAAAAATAACAAAATGA      58
DSM 28194   ATAAAAATATGTTAAATATATCCTCTTATACTTAAATATATAAAAAATAACAAAATGA      58
DSM 28197   ATAAAAATATGTTAAATATATCCTCTTATACTTAAATATATAAAAAATAACAAAATGA      58
DSM 1296T   ATAAAAATATGTTAAATATATCCTCTTATACTTAAATATATAAAAAATAACAAAATGA      58
DSM 27639   ATAAAAATATGTTAAATATATCCTCTTATACTTAAATATATAAAAAATAACAAAATGA      58
DSM 29675   ATAAAAATATGTTAAATATATCCTCTTATACTTAAATATATAAAAAATAACAAAATGA      58
DSM 29676   ATAAAAATATGTTAAATATATCCTCTTATACTTAAATATATAAAAAATAACAAAATGA      58
DSM 29677   ATAAAAATATGTTAAATATATCCTCTTATACTTAAATATATAAAAAATAACAAAATGA      58
DSM 29678   ATAAAAATATGTTAAATATATCCTCTTATACTTAAATATATAAAAAATAACAAAATGA      58
DSM 29679   ATAAAAATATGTTAAATATATCCTCTTATACTTAAATATATAAAAAATAACAAAATGA      58
DSM 29683   ATAAAAATATGTTAAATATATCCTCTTATACTTAAATATATAAAAAATAACAAAATGA      58
DSM 29684   ATAAAAATATGTTAAATATATCCTCTTATACTTAAATATATAAAAAATAACAAAATGA      58
DSM 29685   ATAAAAATATGTTAAATATATCCTCTTATACTTAAATATATAAAAAATAACAAAATGA      58
DSM 29686   ATAAAAATATGTTAAATATATCCTCTTATACTTAAATATATAAAAAATAACAAAATGA      58
DSM 29089   ATAAAAATATGTTAAATATATCCTCTTATACTTAAATATATAAAAAATAACAAAATGA      58
DSM 29689   ATAAAAATATGTTAAATATATCCTCTTATACTTAAATATATAAAAAATAACAAAATGA      58
DSM 29692   ATAAAAATATGTTAAATATATCCTCTTATACTTAAATATATAAAAAATAACAAAATGA      58
DSM 29091   ATAAAAATATGTTAAATATATCCTCTTATACTTAAATATATAAAAAATAACAAAATGA      58
630          ATAAAAATATGTTAAATATATCCTCTTATACTTAAATATATAAAAAATAACAAAATGA      58
630 delta erm ATAAAAATATGTTAAATATATCCTCTTATACTTAAATATATAAAAAATAACAAAATGA      58
DSM 29744   ATAAAAATATGTTAAATATATCCTCTTATACTTAAATATATAAAAAATAACAAAATGA      58
DSM 29745   ATAAAAATATGTTAAATATATCCTCTTATACTTAAATATATAAAAAATAACAAAATGA      58
DSM 29754   ATAAAAATATGTTAAATATATCCTCTTATACTTAAATATATAAAAAATAACAAAATGA      58
DSM 29687   ATAAAAATATGTTAAATATATCCTCTTATACTTAAATATATAAAAAATAACAAAATGA      58
DSM 29690   ATAAAAATATGTTAAATATATCCTCTTATACTTAAATATATAAAAAATAACAAAATGA      58
DSM 29691   ATAAAAATATGTTAAATATATCCTCTTATACTTAAATATATAAAAAATAACAAAATGA      58
DSM 29092   ATAAAAATATGTTAAATATATCCTCTTATACTTAAATATATAAAAAATAACAAAATGA      58
DSM 29093   ATAAAAATATGTTAAATATATCCTCTTATACTTAAATATATAAAAAATAACAAAATGA      58
DSM 29756   ATAAAAATATGTTAAATATATCCTCTTATACTTAAATATATAAAAAATAACAAAATGA      58
DSM 29094   ATAAAAATATGTTAAATATATCCTCTTATACTTAAATATATAAAAAATAACAAAATGA      58
2007855     ATAAAAATACGTTAAATATATCCTCTTATACTTAAATATATAAAAAATAACAAAATGA      58
BI1        ATAAAAATACGTTAAATATATCCTCTTATACTTAAATATATAAAAAATAACAAAATGA      58
DSM 28196   ATAAAAATACGTTAAATATATCCTCTTATACTTAAATATATAAAAAATAACAAAATGA      58
DSM 27638   ATAAAAATACGTTAAATATATCCTCTTATACTTAAATATATAAAAAATAACAAAATGA      58
DSM 27640   ATAAAAATACGTTAAATATATCCTCTTATACTTAAATATATAAAAAATAACAAAATGA      58
DSM 29680   ATAAAAATACGTTAAATATATCCTCTTATACTTAAATATATAAAAAATAACAAAATGA      58
R20291     ATAAAAATACGTTAAATATATCCTCTTATACTTAAATATATAAAAAATAACAAAATGA      58
DSM 29747   ATAAAAATATGTTAAATATATCCTCTTATACTTAAATATATAAAAAATAACAAAATGA      58
DSM 29752   ATAAAAATATGTTAAATATATCCTCTTATACTTAAATATATAAAAAATAACAAAATGA      58
DSM 29753   ATAAAAATATGTTAAATATATCCTCTTATACTTAAATATATAAAAAATAACAAAATGA      58
M120       ATAAAAATATGTTAAATATATCCTCTTATACTTAAATATATAAAAAATAACAAAATGA      58
*****

```



|               |                                                              |     |
|---------------|--------------------------------------------------------------|-----|
| M68           | TGAATGCACAGTAGTTCACCTTTTTATATTTCTAATGGTAACAAAATATTTTTTTATATA | 178 |
| CF5           | TGAATGCACAGTAGTTCACCTTTTTATATTTCTAATGGTAACAAAATATTTTTTTATATA | 178 |
| DSM-29095     | TGAATGCACAGTAGTTCACCTTTTTATATTTCTAATGGTAACAAAATATTTTTTTATATA | 178 |
| DSM-29090     | TGAATGCACAGTAGTTCACCTTTTTATATTTCTAATGGTAACAAAATATTTTTTTATATA | 178 |
| DSM-28194     | TGAATGCACAGTAGTTCACCTTTTTATATTTCTAATGGTAACAAAATATTTTTTTATATA | 178 |
| DSM-28197     | TGAATGCACAGTAGTTCACCTTTTTATATTTCTAATGGTAACAAAATATTTTTTTATATA | 178 |
| DSM-1296T     | TGAATGCACAGTAGTTCACCTTTTTATATTTCTAATGGTAACAAAATATTTTTTTATATA | 178 |
| DSM-27639     | TGAATGCACAGTAGTTCACCTTTTTATATTTCTAATGGTAACAAAATATTTTTTTATATA | 178 |
| DSM-29675     | TGAATGCACAGTAGTTCACCTTTTTATATTTCTAATGGTAACAAAATATTTTTTTATATA | 178 |
| DSM-29676     | TGAATGCACAGTAGTTCACCTTTTTATATTTCTAATGGTAACAAAATATTTTTTTATATA | 178 |
| DSM-29677     | TGAATGCACAGTAGTTCACCTTTTTATATTTCTAATGGTAACAAAATATTTTTTTATATA | 178 |
| DSM-29678     | TGAATGCACAGTAGTTCACCTTTTTATATTTCTAATGGTAACAAAATATTTTTTTATATA | 178 |
| DSM-29679     | TGAATGCACAGTAGTTCACCTTTTTATATTTCTAATGGTAACAAAATATTTTTTTATATA | 178 |
| DSM-29683     | TGAATGCACAGTAGTTCACCTTTTTATATTTCTAATGGTAACAAAATATTTTTTTATATA | 178 |
| DSM-29684     | TGAATGCACAGTAGTTCACCTTTTTATATTTCTAATGGTAACAAAATATTTTTTTATATA | 178 |
| DSM-29685     | TGAATGCACAGTAGTTCACCTTTTTATATTTCTAATGGTAACAAAATATTTTTTTATATA | 178 |
| DSM-29686     | TGAATGCACAGTAGTTCACCTTTTTATATTTCTAATGGTAACAAAATATTTTTTTATATA | 178 |
| DSM-29089     | TGAATGCACAGTAGTTCACCTTTTTATATTTCTAATGGTAACAAAATATTTTTTTATATA | 178 |
| DSM-29689     | TGAATGCACAGTAGTTCACCTTTTTATATTTCTAATGGTAACAAAATATTTTTTTATATA | 178 |
| DSM-29692     | TGAATGCACAGTAGTTCACCTTTTTATATTTCTAATGGTAACAAAATATTTTTTTATATA | 178 |
| DSM-29091     | TGAATGCACAGTAGTTCACCTTTTTATATTTCTAATGGTAACAAAATATTTTTTTATATA | 178 |
| 630           | TGAATGCACAGTAGTTCACCTTTTTATATTTCTAATGGTAACAAAATATTTTTTTATATA | 178 |
| 630-delta-erm | TGAATGCACAGTAGTTCACCTTTTTATATTTCTAATGGTAACAAAATATTTTTTTATATA | 178 |
| DSM-29744     | TGAATGCACAGTAGTTCACCTTTTTATATTTCTAATGGTAACAAAATATTTTTTTATATA | 178 |
| DSM-29745     | TGAATGCACAGTAGTTCACCTTTTTATATTTCTAATGGTAACAAAATATTTTTTTATATA | 178 |
| DSM-29754     | TGAATGCACAGTAGTTCACCTTTTTATATTTCTAATGGTAACAAAATATTTTTTTATATA | 178 |
| DSM-29687     | TGAATGCACAGTAGTTCACCTTTTTATATTTCTAATGGTAACAAAATATTTTTTTATATA | 178 |
| DSM-29690     | TGAATGCACAGTAGTTCACCTTTTTATATTTCTAATGGTAACAAAATATTTTTTTATATA | 178 |
| DSM-29691     | TGAATGCACAGTAGTTCACCTTTTTATATTTCTAATGGTAACAAAATATTTTTTTATATA | 178 |
| DSM-29092     | TGAATGCACAGTAGTTCACCTTTTTATATTTCTAATGGTAACAAAATATTTTTTTATATA | 178 |
| DSM-29093     | TGAATGCACAGTAGTTCACCTTTTTATATTTCTAATGGTAACAAAATATTTTTTTATATA | 178 |
| DSM-29756     | TGAATGCACAGTAGTTCACCTTTTTATATTTCTAATGGTAACAAAATATTTTTTTATATA | 178 |
| DSM-29094     | TGAATGCACAGTAGTTCACCTTTTTATATTTCTAATGGTAACAAAATATTTTTTTATATA | 178 |
| 2007855       | TGAATGCACAGTAGTTCACCTTTTTATATTTCTAATGGTAACAAAATATTTTTTTATATA | 178 |
| BI1           | TGAATGCACAGTAGTTCACCTTTTTATATTTCTAATGGTAACAAAATATTTTTTTATATA | 178 |
| DSM-28196     | TGAATGCACAGTAGTTCACCTTTTTATATTTCTAATGGTAACAAAATATTTTTTTATATA | 178 |
| DSM-27638     | TGAATGCACAGTAGTTCACCTTTTTATATTTCTAATGGTAACAAAATATTTTTTTATATA | 178 |
| DSM-27640     | TGAATGCACAGTAGTTCACCTTTTTATATTTCTAATGGTAACAAAATATTTTTTTATATA | 178 |
| DSM-29680     | TGAATGCACAGTAGTTCACCTTTTTATATTTCTAATGGTAACAAAATATTTTTTTATATA | 178 |
| R20291        | TGAATGCACAGTAGTTCACCTTTTTATATTTCTAATGGTAACAAAATATTTTTTTATATA | 178 |
| DSM-29747     | TGAATGCACAGTAGTTCACCTTTTTATATTTCTAATGGTAACAAAATATTTTTTTATATA | 178 |
| DSM-29752     | TGAATGCACAGTAGTTCACCTTTTTATATTTCTAATGGTAACAAAATATTTTTTTATATA | 178 |
| DSM-29753     | TGAATGCACAGTAGTTCACCTTTTTATATTTCTAATGGTAACAAAATATTTTTTTATATA | 178 |
| M120          | TGAATGCACAGTAGTTCACCTTTTTATATTTCTAATGGTAACAAAATATTTTTTTATATA | 178 |
|               | *****                                                        |     |

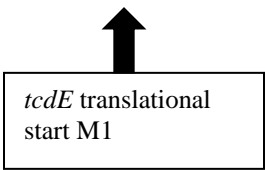

|               |                                                              |     |
|---------------|--------------------------------------------------------------|-----|
| M68           | AACCTAGGAGGCGTTATGAATATGACAATATCTTTTTTATCAGAGCATATATTTATAAAG | 238 |
| CF5           | AACCTAGGAGGCGTTATGAATATGACAATATCTTTTTTATCAGAGCATATATTTATAAAG | 238 |
| DSM-29095     | AACCTAGGAGGCGTTATGAATATGACAATATCTTTTTTATCAGAGCATATATTTATAAAG | 238 |
| DSM-29090     | AACCTAGGAGGCGTTATGAATATGACAATATCTTTTTTATCAGAGCATATATTTATAAAG | 238 |
| DSM-28194     | AACCTAGGAGGCGTTATGAATATGACAATATCTTTTTTATCAGAGCATATATTTATAAAG | 238 |
| DSM-28197     | AACCTAGGAGGCGTTATGAATATGACAATATCTTTTTTATCAGAGCATATATTTATAAAG | 238 |
| DSM-1296T     | AACCTAGGAGGCGTTATGAATATGACAATATCTTTTTTATCAGAGCATATATTTATAAAG | 238 |
| DSM-27639     | AACCTAGGAGGCGTTATGAATATGACAATATCTTTTTTATCAGAGCATATATTTATAAAG | 238 |
| DSM-29675     | AACCTAGGAGGCGTTATGAATATGACAATATCTTTTTTATCAGAGCATATATTTATAAAG | 238 |
| DSM-29676     | AACCTAGGAGGCGTTATGAATATGACAATATCTTTTTTATCAGAGCATATATTTATAAAG | 238 |
| DSM-29677     | AACCTAGGAGGCGTTATGAATATGACAATATCTTTTTTATCAGAGCATATATTTATAAAG | 238 |
| DSM-29678     | AACCTAGGAGGCGTTATGAATATGACAATATCTTTTTTATCAGAGCATATATTTATAAAG | 238 |
| DSM-29679     | AACCTAGGAGGCGTTATGAATATGACAATATCTTTTTTATCAGAGCATATATTTATAAAG | 238 |
| DSM-29683     | AACCTAGGAGGCGTTATGAATATGACAATATCTTTTTTATCAGAGCATATATTTATAAAG | 238 |
| DSM-29684     | AACCTAGGAGGCGTTATGAATATGACAATATCTTTTTTATCAGAGCATATATTTATAAAG | 238 |
| DSM-29685     | AACCTAGGAGGCGTTATGAATATGACAATATCTTTTTTATCAGAGCATATATTTATAAAG | 238 |
| DSM-29686     | AACCTAGGAGGCGTTATGAATATGACAATATCTTTTTTATCAGAGCATATATTTATAAAG | 238 |
| DSM-29089     | AACCTAGGAGGCGTTATGAATATGACAATATCTTTTTTATCAGAGCATATATTTATAAAG | 238 |
| DSM-29689     | AACCTAGGAGGCGTTATGAATATGACAATATCTTTTTTATCAGAGCATATATTTATAAAG | 238 |
| DSM-29692     | AACCTAGGAGGCGTTATGAATATGACAATATCTTTTTTATCAGAGCATATATTTATAAAG | 238 |
| DSM-29091     | AACCTAGGAGGCGTTATGAATATGACAATATCTTTTTTATCAGAGCATATATTTATAAAG | 238 |
| 630           | AACCTAGGAGGCGTTATGAATATGACAATATCTTTTTTATCAGAGCATATATTTATAAAG | 238 |
| 630-delta-erm | AACCTAGGAGGCGTTATGAATATGACAATATCTTTTTTATCAGAGCATATATTTATAAAG | 238 |
| DSM-29744     | AACCTAGGAGGCGTTATGAATATGACAATATCTTTTTTATCAGAGCATATATTTATAAAG | 238 |
| DSM-29745     | AACCTAGGAGGCGTTATGAATATGACAATATCTTTTTTATCAGAGCATATATTTATAAAG | 238 |
| DSM-29754     | AACCTAGGAGGCGTTATGAATATGACAATATCTTTTTTATCAGAGCATATATTTATAAAG | 238 |
| DSM-29687     | AACCTAGGAGGCGTTATGAATATGACAATATCTTTTTTATCAGAGCATATATTTATAAAG | 238 |
| DSM-29690     | AACCTAGGAGGCGTTATGAATATGACAATATCTTTTTTATCAGAGCATATATTTATAAAG | 238 |
| DSM-29691     | AACCTAGGAGGCGTTATGAATATGACAATATCTTTTTTATCAGAGCATATATTTATAAAG | 238 |
| DSM-29092     | AACCTAGGAGGCGTTATGAATATGACAATATCTTTTTTATCAGAGCATATATTTATAAAG | 238 |
| DSM-29093     | AACCTAGGAGGCGTTATGAATATGACAATATCTTTTTTATCAGAGCATATATTTATAAAG | 238 |
| DSM-29756     | AACCTAGGAGGCGTTATGAATATGACAATATCTTTTTTATCAGAGCATATATTTATAAAG | 238 |
| DSM-29094     | AACCTAGGAGGCGTTATGAATATGACAATATCTTTTTTATCAGAGCATATATTTATAAAG | 238 |
| 2007855       | AACCTAGGAGGCGTTATGAATATGACAATATCTTTTTTATCAGAGCATATATTTATAAAG | 238 |
| BI1           | AACCTAGGAGGCGTTATGAATATGACAATATCTTTTTTATCAGAGCATATATTTATAAAG | 238 |
| DSM-28196     | AACCTAGGAGGCGTTATGAATATGACAATATCTTTTTTATCAGAGCATATATTTATAAAG | 238 |
| DSM-27638     | AACCTAGGAGGCGTTATGAATATGACAATATCTTTTTTATCAGAGCATATATTTATAAAG | 238 |
| DSM-27640     | AACCTAGGAGGCGTTATGAATATGACAATATCTTTTTTATCAGAGCATATATTTATAAAG | 238 |
| DSM-29680     | AACCTAGGAGGCGTTATGAATATGACAATATCTTTTTTATCAGAGCATATATTTATAAAG | 238 |
| R20291        | AACCTAGGAGGCGTTATGAATATGACAATATCTTTTTTATCAGAGCATATATTTATAAAG | 238 |
| DSM-29747     | AACCTAGGAGGCGTTATGAATATGACAATATCTTTTTTATCAGAGCATATATTTATAAAG | 238 |
| DSM-29752     | AACCTAGGAGGCGTTATGAATATGACAATATCTTTTTTATCAGAGCATATATTTATAAAG | 238 |
| DSM-29753     | AACCTAGGAGGCGTTATGAATATGACAATATCTTTTTTATCAGAGCATATATTTATAAAG | 238 |
| M120          | AACCTAGGAGGCGTTATGAATATGACAATATCTTTTTTATCAGAGCATATATTTATAAAG | 238 |

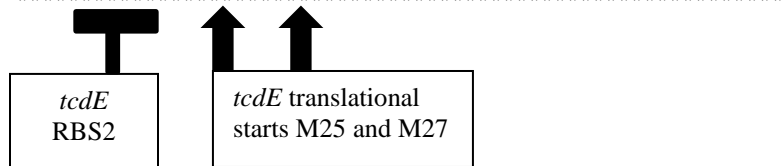

Supplementary Material

|               |                                                               |     |
|---------------|---------------------------------------------------------------|-----|
| M68           | TTAGTAATTTTAACTATATCATTGATACATTATTAGGATGTTTAAAGTGCAATAAAAAAGT | 298 |
| CF5           | TTAGTAATTTTAACTATATCATTGATACATTATTAGGATGTTTAAAGTGCAATAAAAAAGT | 298 |
| DSM-29095     | TTAGTAATTTTAACTATATCATTGATACATTATTAGGATGTTTAAAGTGCAATAAAAAAGT | 298 |
| DSM-29090     | TTAGTAATTTTAACTATATCATTGATACATTATTAGGATGTTTAAAGTGCAATAAAAAAGT | 298 |
| DSM-28194     | TTAGTAATTTTAACTATATCATTGATACATTATTAGGATGTTTAAAGTGCAATAAAAAAGT | 298 |
| DSM-28197     | TTAGTAATTTTAACTATATCATTGATACATTATTAGGATGTTTAAAGTGCAATAAAAAAGT | 298 |
| DSM-1296T     | TTAGTAATTTTAACTATATCATTGATACATTATTAGGATGTTTAAAGTGCAATAAAAAAGT | 298 |
| DSM-27639     | TTAGTAATTTTAACTATATCATTGATACATTATTAGGATGTTTAAAGTGCAATAAAAAAGT | 298 |
| DSM-29675     | TTAGTAATTTTAACTATATCATTGATACATTATTAGGATGTTTAAAGTGCAATAAAAAAGT | 298 |
| DSM-29676     | TTAGTAATTTTAACTATATCATTGATACATTATTAGGATGTTTAAAGTGCAATAAAAAAGT | 298 |
| DSM-29677     | TTAGTAATTTTAACTATATCATTGATACATTATTAGGATGTTTAAAGTGCAATAAAAAAGT | 298 |
| DSM-29678     | TTAGTAATTTTAACTATATCATTGATACATTATTAGGATGTTTAAAGTGCAATAAAAAAGT | 298 |
| DSM-29679     | TTAGTAATTTTAACTATATCATTGATACATTATTAGGATGTTTAAAGTGCAATAAAAAAGT | 298 |
| DSM-29683     | TTAGTAATTTTAACTATATCATTGATACATTATTAGGATGTTTAAAGTGCAATAAAAAAGT | 298 |
| DSM-29684     | TTAGTAATTTTAACTATATCATTGATACATTATTAGGATGTTTAAAGTGCAATAAAAAAGT | 298 |
| DSM-29685     | TTAGTAATTTTAACTATATCATTGATACATTATTAGGATGTTTAAAGTGCAATAAAAAAGT | 298 |
| DSM-29686     | TTAGTAATTTTAACTATATCATTGATACATTATTAGGATGTTTAAAGTGCAATAAAAAAGT | 298 |
| DSM-29089     | TTAGTAATTTTAACTATATCATTGATACATTATTAGGATGTTTAAAGTGCAATAAAAAAGT | 298 |
| DSM-29689     | TTAGTAATTTTAACTATATCATTGATACATTATTAGGATGTTTAAAGTGCAATAAAAAAGT | 298 |
| DSM-29692     | TTAGTAATTTTAACTATATCATTGATACATTATTAGGATGTTTAAAGTGCAATAAAAAAGT | 298 |
| DSM-29091     | TTAGTAATTTTAACTATATCATTGATACATTATTAGGATGTTTAAAGTGCAATAAAAAAGT | 298 |
| 630           | TTAGTAATTTTAACTATATCATTGATACATTATTAGGATGTTTAAAGTGCAATAAAAAAGT | 298 |
| 630-delta-erm | TTAGTAATTTTAACTATATCATTGATACATTATTAGGATGTTTAAAGTGCAATAAAAAAGT | 298 |
| DSM-29744     | TTAGTAATTTTAACTATATCATTGATACATTATTAGGATGTTTAAAGTGCAATAAAAAAGT | 298 |
| DSM-29745     | TTAGTAATTTTAACTATATCATTGATACATTATTAGGATGTTTAAAGTGCAATAAAAAAGT | 298 |
| DSM-29754     | TTAGTAATTTTAACTATATCATTGATACATTATTAGGATGTTTAAAGTGCAATAAAAAAGT | 298 |
| DSM-29687     | TTAGTAATTTTAACTATATCATTGATACATTATTAGGATGTTTAAAGTGCAATAAAAAAGT | 298 |
| DSM-29690     | TTAGTAATTTTAACTATATCATTGATACATTATTAGGATGTTTAAAGTGCAATAAAAAAGT | 298 |
| DSM-29691     | TTAGTAATTTTAACTATATCATTGATACATTATTAGGATGTTTAAAGTGCAATAAAAAAGT | 298 |
| DSM-29092     | TTAGTAATTTTAACTATATCATTGATACATTATTAGGATGTTTAAAGTGCAATAAAAAAGT | 298 |
| DSM-29093     | TTAGTAATTTTAACTATATCATTGATACATTATTAGGATGTTTAAAGTGCAATAAAAAAGT | 298 |
| DSM-29756     | TTAGTAATTTTAACTATATCATTGATACATTATTAGGATGTTTAAAGTGCAATAAAAAAGT | 298 |
| DSM-29094     | TTAGTAATTTTAACTATATCATTGATACATTATTAGGATGTTTAAAGTGCAATAAAAAAGT | 298 |
| 2007855       | TTAGTAATTTTAACTATATCATTGATACATTATTAGGATGTTTAAAGTGCAATAAAAAAGT | 298 |
| BI1           | TTAGTAATTTTAACTATATCATTGATACATTATTAGGATGTTTAAAGTGCAATAAAAAAGT | 298 |
| DSM-28196     | TTAGTAATTTTAACTATATCATTGATACATTATTAGGATGTTTAAAGTGCAATAAAAAAGT | 298 |
| DSM-27638     | TTAGTAATTTTAACTATATCATTGATACATTATTAGGATGTTTAAAGTGCAATAAAAAAGT | 298 |
| DSM-27640     | TTAGTAATTTTAACTATATCATTGATACATTATTAGGATGTTTAAAGTGCAATAAAAAAGT | 298 |
| DSM-29680     | TTAGTAATTTTAACTATATCATTGATACATTATTAGGATGTTTAAAGTGCAATAAAAAAGT | 298 |
| R20291        | TTAGTAATTTTAACTATATCATTGATACATTATTAGGATGTTTAAAGTGCAATAAAAAAGT | 298 |
| DSM-29747     | TTAGTAATTTTAACTATATCATTGATACATTATTAGGATGTTTAAAGTGCAATAAAAAAGT | 298 |
| DSM-29752     | TTAGTAATTTTAACTATATCATTGATACATTATTAGGATGTTTAAAGTGCAATAAAAAAGT | 298 |
| DSM-29753     | TTAGTAATTTTAACTATATCATTGATACATTATTAGGATGTTTAAAGTGCAATAAAAAAGT | 298 |
| M120          | TTAGTAATTTTAACTATATCATTGATACATTATTAGGATGTTTAAAGTGCAATAAAAAAGT | 298 |
|               | *****                                                         |     |





Supplementary Material

|               |                                                              |     |
|---------------|--------------------------------------------------------------|-----|
| M68           | TGTATATTTTTTTTATCAGTAGTTGACATTCTTACAAAGTTTAACTTTTTATTTATGTGA | 418 |
| CF5           | TGTATATTTTTTTTATCAGTAGTTGACATTCTTACAAAGTTTAACTTTTTATTTATGTGA | 418 |
| DSM-29095     | TGTATATTTTTTTTATCAGTAGTTGACATTCTTACAAAGTTTAACTTTTTATTTATGTGA | 418 |
| DSM-29090     | TGTATATTTTTTTTATCAGTAGTTGACATTCTTACAAAGTTTAACTTTTTATTTATGTGA | 418 |
| DSM-28194     | TGTATATTTTTTTTATCAGTAGTTGACATTCTTACAAAGTTTAACTTTTTATTTATGTGA | 418 |
| DSM-28197     | TGTATATTTTTTTTATCAGTAGTTGACATTCTTACAAAGTTTAACTTTTTATTTATGTGA | 418 |
| DSM-1296T     | TGTATATTTTTTTTATCAGTAGTTGACATTCTTACAAAGTTTAACTTTTTATTTATGTGA | 418 |
| DSM-27639     | TGTATATTTTTTTTATCAGTAGTTGACATTCTTACAAAGTTTAACTTTTTATTTATGTGA | 418 |
| DSM-29675     | TGTATATTTTTTTTATCAGTAGTTGACATTCTTACAAAGTTTAACTTTTTATTTATGTGA | 418 |
| DSM-29676     | TGTATATTTTTTTTATCAGTAGTTGACATTCTTACAAAGTTTAACTTTTTATTTATGTGA | 418 |
| DSM-29677     | TGTATATTTTTTTTATCAGTAGTTGACATTCTTACAAAGTTTAACTTTTTATTTATGTGA | 418 |
| DSM-29678     | TGTATATTTTTTTTATCAGTAGTTGACATTCTTACAAAGTTTAACTTTTTATTTATGTGA | 418 |
| DSM-29679     | TGTATATTTTTTTTATCAGTAGTTGACATTCTTACAAAGTTTAACTTTTTATTTATGTGA | 418 |
| DSM-29683     | TGTATATTTTTTTTATCAGTAGTTGACATTCTTACAAAGTTTAACTTTTTATTTATGTGA | 418 |
| DSM-29684     | TGTATATTTTTTTTATCAGTAGTTGACATTCTTACAAAGTTTAACTTTTTATTTATGTGA | 418 |
| DSM-29685     | TGTATATTTTTTTTATCAGTAGTTGACATTCTTACAAAGTTTAACTTTTTATTTATGTGA | 418 |
| DSM-29686     | TGTATATTTTTTTTATCAGTAGTTGACATTCTTACAAAGTTTAACTTTTTATTTATGTGA | 418 |
| DSM-29089     | TGTATATTTTTTTTATCAGTAGTTGACATTCTTACAAAGTTTAACTTTTTATTTATGTGA | 418 |
| DSM-29689     | TGTATATTTTTTTTATCAGTAGTTGACATTCTTACAAAGTTTAACTTTTTATTTATGTGA | 418 |
| DSM-29692     | TGTATATTTTTTTTATCAGTAGTTGACATTCTTACAAAGTTTAACTTTTTATTTATGTGA | 418 |
| DSM-29091     | TGTATATTTTTTTTATCAGTAGTTGACATTCTTACAAAGTTTAACTTTTTATTTATGTGA | 418 |
| 630           | TGTATATTTTTTTTATCAGTAGTTGACATTCTTACAAAGTTTAACTTTTTATTTATGTGA | 418 |
| 630-delta-erm | TGTATATTTTTTTTATCAGTAGTTGACATTCTTACAAAGTTTAACTTTTTATTTATGTGA | 418 |
| DSM-29744     | TGTATATTTTTTTTATCAGTAGTTGACATTCTTACAAAGTTTAACTTTTTATTTATGTGA | 418 |
| DSM-29745     | TGTATATTTTTTTTATCAGTAGTTGACATTCTTACAAAGTTTAACTTTTTATTTATGTGA | 418 |
| DSM-29754     | TGTATATTTTTTTTATCAGTAGTTGACATTCTTACAAAGTTTAACTTTTTATTTATGTGA | 418 |
| DSM-29687     | TGTATATTTTTTTTATCAGTAGTTGACATTCTTACAAAGTTTAACTTTTTATTTATGTGA | 418 |
| DSM-29690     | TGTATATTTTTTTTATCAGTAGTTGACATTCTTACAAAGTTTAACTTTTTATTTATGTGA | 418 |
| DSM-29691     | TGTATATTTTTTTTATCAGTAGTTGACATTCTTACAAAGTTTAACTTTTTATTTATGTGA | 418 |
| DSM-29092     | TGTATATTTTTTTTATCAGTAGTTGACATTCTTACAAAGTTTAACTTTTTATTTATGTGA | 418 |
| DSM-29093     | TGTATATTTTTTTTATCAGTAGTTGACATTCTTACAAAGTTTAACTTTTTATTTATGTGA | 418 |
| DSM-29756     | TGTATATTTTTTTTATCAGTAGTTGACATTCTTACAAAGTTTAACTTTTTATTTATGTGA | 418 |
| DSM-29094     | TGTATATTTTTTTTATCAGTAGTTGACATTCTTACAAAGTTTAACTTTTTATTTATGTGA | 418 |
| 2007855       | TGTATATTTTTTTTATCAGTAGTTGACATTCTTACAAAGTTTAACTTTTTATTTATGTGA | 418 |
| BI1           | TGTATATTTTTTTTATCAGTAGTTGACATTCTTACAAAGTTTAACTTTTTATTTATGTGA | 418 |
| DSM-28196     | TGTATATTTTTTTTATCAGTAGTTGACATTCTTACAAAGTTTAACTTTTTATTTATGTGA | 418 |
| DSM-27638     | TGTATATTTTTTTTATCAGTAGTTGACATTCTTACAAAGTTTAACTTTTTATTTATGTGA | 418 |
| DSM-27640     | TGTATATTTTTTTTATCAGTAGTTGACATTCTTACAAAGTTTAACTTTTTATTTATGTGA | 418 |
| DSM-29680     | TGTATATTTTTTTTATCAGTAGTTGACATTCTTACAAAGTTTAACTTTTTATTTATGTGA | 418 |
| R20291        | TGTATATTTTTTTTATCAGTAGTTGACATTCTTACAAAGTTTAACTTTTTATTTATGTGA | 418 |
| DSM-29747     | TGTATATTTTTTTTATCAGTAGTTGACATTCTTACAAAGTTTAACTTTTTATTTATGTGA | 418 |
| DSM-29752     | TGTATATTTTTTTTATCAGTAGTTGACATTCTTACAAAGTTTAACTTTTTATTTATGTGA | 418 |
| DSM-29753     | TGTATATTTTTTTTATCAGTAGTTGACATTCTTACAAAGTTTAACTTTTTATTTATGTGA | 418 |
| M120          | TGTATATTTTTTTTATCAGTAGTTGACATTCTTACAAAGTTTAACTTTTTATTTATGTGA | 418 |
|               | *****                                                        |     |







|               |                          |                                      |     |
|---------------|--------------------------|--------------------------------------|-----|
| M68           | ATGAATGCTAAGGATGAAAAGTAA | GTAATGGTAGATATAATAAAGATATTAACAAATAAA | 658 |
| CF5           | ATGAATGCTAAGGATGAAAAGTAA | GTAATGGTAGATATAATAAAGATATTAACAAATAAA | 658 |
| DSM-29095     | ATGAATGCTAAGGATGAAAAGTAA | GTAATGGTAGATATAATAAAGATATTAACAAATAAA | 658 |
| DSM-29090     | ATGAATGCTAAGGATGAAAAGTAA | GTAATGGTAGATATAATAAAGATATTAACAAATAAA | 658 |
| DSM-28194     | ATGAATGCTAAGGATGAAAAGTAA | GTAATGGTAGATATAATAAAGATATTAACAAATAAA | 658 |
| DSM-28197     | ATGAATGCTAAGGATGAAAAGTAA | GTAATGGTAGATATAATAAAGATATTAACAAATAAA | 658 |
| DSM-1296T     | ATGAATGCTAAGGATGAAAAGTAA | GTAATGGTAGATATAATAAAGATATTAACAAATAAA | 658 |
| DSM-27639     | ATGAATGCTAAGGATGAAAAGTAA | GTAATGGTAGATATAATAAAGATATTAACAAATAAA | 658 |
| DSM-29675     | ATGAATGCTAAGGATGAAAAGTAA | GTAATGGTAGATATAATAAAGATATTAACAAATAAA | 658 |
| DSM-29676     | ATGAATGCTAAGGATGAAAAGTAA | GTAATGGTAGATATAATAAAGATATTAACAAATAAA | 658 |
| DSM-29677     | ATGAATGCTAAGGATGAAAAGTAA | GTAATGGTAGATATAATAAAGATATTAACAAATAAA | 658 |
| DSM-29678     | ATGAATGCTAAGGATGAAAAGTAA | GTAATGGTAGATATAATAAAGATATTAACAAATAAA | 658 |
| DSM-29679     | ATGAATGCTAAGGATGAAAAGTAA | GTAATGGTAGATATAATAAAGATATTAACAAATAAA | 658 |
| DSM-29683     | ATGAATGCTAAGGATGAAAAGTAA | GTAATGGTAGATATAATAAAGATATTAACAAATAAA | 658 |
| DSM-29684     | ATGAATGCTAAGGATGAAAAGTAA | GTAATGGTAGATATAATAAAGATATTAACAAATAAA | 658 |
| DSM-29685     | ATGAATGCTAAGGATGAAAAGTAA | GTAATGGTAGATATAATAAAGATATTAACAAATAAA | 658 |
| DSM-29686     | ATGAATGCTAAGGATGAAAAGTAA | GTAATGGTAGATATAATAAAGATATTAACAAATAAA | 658 |
| DSM-29089     | ATGAATGCTAAGGATGAAAAGTAA | GTAATGGTAGATATAATAAAGATATTAACAAATAAA | 658 |
| DSM-29689     | ATGAATGCTAAGGATGAAAAGTAA | GTAATGGTAGATATAATAAAGATATTAACAAATAAA | 658 |
| DSM-29692     | ATGAATGCTAAGGATGAAAAGTAA | GTAATGGTAGATATAATAAAGATATTAACAAATAAA | 658 |
| DSM-29091     | ATGAATGCTAAGGATGAAAAGTAA | GTAATGGTAGATATAATAAAGATATTAACAAATAAA | 658 |
| 630           | ATGAATGCTAAGGATGAAAAGTAA | GTAATGGTAGATATAATAAAGATATTAACAAATAAA | 658 |
| 630-delta-erm | ATGAATGCTAAGGATGAAAAGTAA | GTAATGGTAGATATAATAAAGATATTAACAAATAAA | 658 |
| DSM-29744     | ATGAATGCTAAGGATGAAAAGTAA | GTAATGGTAGATATAATAAAGATATTAACAAATAAA | 658 |
| DSM-29745     | ATGAATGCTAAGGATGAAAAGTAA | GTAATGGTAGATATAATAAAGATATTAACAAATAAA | 658 |
| DSM-29754     | ATGAATGCTAAGGATGAAAAGTAA | GTAATGGTAGATATAATAAAGATATTAACAAATAAA | 658 |
| DSM-29687     | ATGAATGCTAAGGATGAAAAGTAA | GTAATGGTAGATATAATAAAGATATTAACAAATAAA | 658 |
| DSM-29690     | ATGAATGCTAAGGATGAAAAGTAA | GTAATGGTAGATATAATAAAGATATTAACAAATAAA | 658 |
| DSM-29691     | ATGAATGCTAAGGATGAAAAGTAA | GTAATGGTAGATATAATAAAGATATTAACAAATAAA | 658 |
| DSM-29092     | ATGAATGCTAAGGATGAAAAGTAA | GTAATGGTAGATATAATAAAGATATTAACAAATAAA | 658 |
| DSM-29093     | ATGAATGCTAAGGATGAAAAGTAA | GTAATGGTAGATATAATAAAGATATTAACAAATAAA | 658 |
| DSM-29756     | ATGAATGCTAAGGATGAAAAGTAA | GTAATGGTAGATATAATAAAGATATTAACAAATAAA | 658 |
| DSM-29094     | ATGAATGCTAAGGATGAAAAGTAA | GTAATGGTAGATATAATAAAGATATTAACAAATAAA | 658 |
| 2007855       | ATGAATGCTAAGGATGAAAAGTAA | GTAATGGTAGATATAATAAAGATATTAACAAATAAA | 658 |
| BI1           | ATGAATGCTAAGGATGAAAAGTAA | GTAATGGTAGATATAATAAAGATATTAACAAATAAA | 658 |
| DSM-28196     | ATGAATGCTAAGGATGAAAAGTAA | GTAATGGTAGATATAATAAAGATATTAACAAATAAA | 658 |
| DSM-27638     | ATGAATGCTAAGGATGAAAAGTAA | GTAATGGTAGATATAATAAAGATATTAACAAATAAA | 658 |
| DSM-27640     | ATGAATGCTAAGGATGAAAAGTAA | GTAATGGTAGATATAATAAAGATATTAACAAATAAA | 658 |
| DSM-29680     | ATGAATGCTAAGGATGAAAAGTAA | GTAATGGTAGATATAATAAAGATATTAACAAATAAA | 658 |
| R20291        | ATGAATGCTAAGGATGAAAAGTAA | GTAATGGTAGATATAATAAAGATATTAACAAATAAA | 658 |
| DSM-29747     | ATGAATGCTAAGGATGAAAAGTAA | GTAATGGTAGATATAATAAAGATATTAACAAATAAA | 658 |
| DSM-29752     | ATGAATGCTAAGGATGAAAAGTAA | GTAATGGTAGATATAATAAAGATATTAACAAATAAA | 658 |
| DSM-29753     | ATGAATGCTAAGGATGAAAAGTAA | GTAATGGTAGATATAATAAAGATATTAACAAATAAA | 658 |
| M120          | ATGAATGCTAAGGATGAAAAGTAA | GTAATGGTAGATATAATAAAGATATTAACAAATAAA | 658 |

\*\*\*\*\*

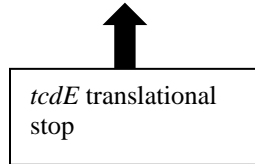



|               |                                                                        |     |
|---------------|------------------------------------------------------------------------|-----|
| M68           | ACGAGGGAGCAG <b>ATG</b> CCAAGAGACACACAAGTATTTAAATACATATAATTTCGAAGCAAGT | 778 |
| CF5           | ACGAGGGAGCAG <b>ATG</b> CCAAGAGACACACAAGTATTTAAATACATATAATTTCGAAGCAAGT | 778 |
| DSM-29095     | ACGAGGGAGCAG <b>ATG</b> CCAAGAGACACACAAGTATTTAAATACATATAATTTCGAAGCAAGT | 778 |
| DSM-29090     | ACGAGGGAGCAG <b>ATG</b> CCAAGAGACACACAAGTATTTAAATACATATAATTTCGAAGCAAGT | 778 |
| DSM-28194     | ACGAGGGAGCAG <b>ATG</b> CCAAGAGACACACAAGTATTTAAATACATATAATTTCGAAGCAAGT | 778 |
| DSM-28197     | ACGAGGGAGCAG <b>ATG</b> CCAAGAGACACACAAGTATTTAAATACATATAATTTCGAAGCAAGT | 778 |
| DSM-1296T     | ACGAGGGAGCAG <b>ATG</b> CCAAGAGACACACAAGTATTTAAATACATATAATTTCGAAGCAAGT | 778 |
| DSM-27639     | ACGAGGGAGCAG <b>ATG</b> CCAAGAGACACACAAGTATTTAAATACATATAATTTCGAAGCAAGT | 778 |
| DSM-29675     | ACGAGGGAGCAG <b>ATG</b> CCAAGAGACACACAAGTATTTAAATACATATAATTTCGAAGCAAGT | 778 |
| DSM-29676     | ACGAGGGAGCAG <b>ATG</b> CCAAGAGACACACAAGTATTTAAATACATATAATTTCGAAGCAAGT | 778 |
| DSM-29677     | ACGAGGGAGCAG <b>ATG</b> CCAAGAGACACACAAGTATTTAAATACATATAATTTCGAAGCAAGT | 778 |
| DSM-29678     | ACGAGGGAGCAG <b>ATG</b> CCAAGAGACACACAAGTATTTAAATACATATAATTTCGAAGCAAGT | 778 |
| DSM-29679     | ACGAGGGAGCAG <b>ATG</b> CCAAGAGACACACAAGTATTTAAATACATATAATTTCGAAGCAAGT | 778 |
| DSM-29683     | ACGAGGGAGCAG <b>ATG</b> CCAAGAGACACACAAGTATTTAAATACATATAATTTCGAAGCAAGT | 778 |
| DSM-29684     | ACGAGGGAGCAG <b>ATG</b> CCAAGAGACACACAAGTATTTAAATACATATAATTTCGAAGCAAGT | 778 |
| DSM-29685     | ACGAGGGAGCAG <b>ATG</b> CCAAGAGACACACAAGTATTTAAATACATATAATTTCGAAGCAAGT | 778 |
| DSM-29686     | ACGAGGGAGCAG <b>ATG</b> CCAAGAGACACACAAGTATTTAAATACATATAATTTCGAAGCAAGT | 778 |
| DSM-29689     | ACGAGGGAGCAG <b>ATG</b> CCAAGAGACACACAAGTATTTAAATACATATAATTTCGAAGCAAGT | 778 |
| DSM-29689     | ACGAGGGAGCAG <b>ATG</b> CCAAGAGACACACAAGTATTTAAATACATATAATTTCGAAGCAAGT | 778 |
| DSM-29692     | ACGAGGGAGCAG <b>ATG</b> CCAAGAGACACACAAGTATTTAAATACATATAATTTCGAAGCAAGT | 778 |
| DSM-29091     | ACGAGGGAGCAG <b>ATG</b> CCAAGAGACACACAAGTATTTAAATACATATAATTTCGAAGCAAGT | 778 |
| 630           | ACGAGGGAGCAG <b>ATG</b> CCAAGAGACACACAAGTATTTAAATACATATAATTTCGAAGCAAGT | 778 |
| 630-delta-erm | ACGAGGGAGCAG <b>ATG</b> CCAAGAGACACACAAGTATTTAAATACATATAATTTCGAAGCAAGT | 778 |
| DSM-29744     | ACGAGGGAGCAG <b>ATG</b> CCAAGAGACACACAAGTATTTAAATACATATAATTTCGAAGCAAGT | 778 |
| DSM-29745     | ACGAGGGAGCAG <b>ATG</b> CCAAGAGACACACAAGTATTTAAATACATATAATTTCGAAGCAAGT | 778 |
| DSM-29754     | ACGAGGGAGCAG <b>ATG</b> CCAAGAGACACACAAGTATTTAAATACATATAATTTCGAAGCAAGT | 778 |
| DSM-29687     | ACGAGGGAGCAG <b>ATG</b> CCAAGAGACACACAAGTATTTAAATACATATAATTTCGAAGCAAGT | 778 |
| DSM-29690     | ACGAGGGAGCAG <b>ATG</b> CCAAGAGACACACAAGTATTTAAATACATATAATTTCGAAGCAAGT | 778 |
| DSM-29691     | ACGAGGGAGCAG <b>ATG</b> CCAAGAGACACACAAGTATTTAAATACATATAATTTCGAAGCAAGT | 778 |
| DSM-29092     | ACGAGGGAGCAG <b>ATG</b> CCAAGAGACACACAAGTATTTAAATACATATAATTTCGAAGCAAGT | 778 |
| DSM-29093     | ACGAGGGAGCAG <b>ATG</b> CCAAGAGACACACAAGTATTTAAATACATATAATTTCGAAGCAAGT | 778 |
| DSM-29756     | ACGAGGGAGCAG <b>ATG</b> CCAAGAGACACACAAGTATTTAAATACATATAATTTCGAAGCAAGT | 778 |
| DSM-29094     | ACGAGGGAGCAG <b>ATG</b> CCAAGAGACACACAAGTATTTAAATACATATAATTTCGAAGCAAGT | 778 |
| 2007855       | ACGAGGGAGCAG <b>ATG</b> CCAAGAGACACACAAGTATTTAAATACATATAATTTCGAAGCAAGT | 778 |
| BI1           | ACGAGGGAGCAG <b>ATG</b> CCAAGAGACACACAAGTATTTAAATACATATAATTTCGAAGCAAGT | 778 |
| DSM-28196     | ACGAGGGAGCAG <b>ATG</b> CCAAGAGACACACAAGTATTTAAATACATATAATTTCGAAGCAAGT | 778 |
| DSM-27638     | ACGAGGGAGCAG <b>ATG</b> CCAAGAGACACACAAGTATTTAAATACATATAATTTCGAAGCAAGT | 778 |
| DSM-27640     | ACGAGGGAGCAG <b>ATG</b> CCAAGAGACACACAAGTATTTAAATACATATAATTTCGAAGCAAGT | 778 |
| DSM-29680     | ACGAGGGAGCAG <b>ATG</b> CCAAGAGACACACAAGTATTTAAATACATATAATTTCGAAGCAAGT | 778 |
| R20291        | ACGAGGGAGCAG <b>ATG</b> CCAAGAGACACACAAGTATTTAAATACATATAATTTCGAAGCAAGT | 778 |
| DSM-29747     | ACGAGGGAGCAG <b>ATG</b> CCAAGAGACACACAAGTATTTAAATACATATAATTTCGAAGCAAGT | 778 |
| DSM-29752     | ACGAGGGAGCAG <b>ATG</b> CCAAGAGACACACAAGTATTTAAATACATATAATTTCGAAGCAAGT | 778 |
| DSM-29753     | ACGAGGGAGCAG <b>ATG</b> CCAAGAGACACACAAGTATTTAAATACATATAATTTCGAAGCAAGT | 778 |
| M120          | ACGAGGGAGCAG <b>ATG</b> CCAAGAGACACACAAGTATTTAAATACATATAATTTCGAAGCAAGT | 778 |

\*\*\*\*\*

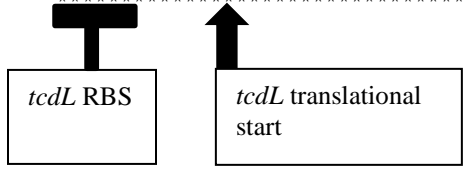





|               |                                                                        |     |
|---------------|------------------------------------------------------------------------|-----|
| M68           | TGGTCAGTTGGTAAAAATCTAT <b>TAA</b> GCTACATTAGTTACAGATATCACAAACTATAATAGT | 898 |
| CF5           | TGGTCAGTTGGTAAAAATCTAT <b>TAA</b> GCTACATTAGTTACAGATATCACAAACTATAATAGT | 898 |
| DSM-29095     | TGGTCAGTTGGTAAAAATCTAT <b>TAA</b> GCTACATTAGTTACAGATATCACAAACTATAATAGT | 898 |
| DSM-29090     | TGGTCAGTTGGTAAAAATCTAT <b>TAA</b> GCTACATTAGTTACAGATATCACAAACTATAATAGT | 898 |
| DSM-28194     | TGGTCAGTTGGTAAAAATCTAT <b>TAA</b> GCTACATTAGTTACAGATATCACAAACTATAATAGT | 898 |
| DSM-28197     | TGGTCAGTTGGTAAAAATCTAT <b>TAA</b> GCTACATTAGTTACAGATATCACAAACTATAATAGT | 898 |
| DSM-1296T     | TGGTCAGTTGGTAAAAATCTAT <b>TAA</b> GCTACATTAGTTACAGATATCACAAACTATAATAGT | 898 |
| DSM-27639     | TGGTCAGTTGGTAAAAATCTAT <b>TAA</b> GCTACATTAGTTACAGATATCACAAACTATAATAGT | 898 |
| DSM-29675     | TGGTCAGTTGGTAAAAATCTAT <b>TAA</b> GCTACATTAGTTACAGATATCACAAACTATAATAGT | 898 |
| DSM-29676     | TGGTCAGTTGGTAAAAATCTAT <b>TAA</b> GCTACATTAGTTACAGATATCACAAACTATAATAGT | 898 |
| DSM-29677     | TGGTCAGTTGGTAAAAATCTAT <b>TAA</b> GCTACATTAGTTACAGATATCACAAACTATAATAGT | 898 |
| DSM-29678     | TGGTCAGTTGGTAAAAATCTAT <b>TAA</b> GCTACATTAGTTACAGATATCACAAACTATAATAGT | 898 |
| DSM-29679     | TGGTCAGTTGGTAAAAATCTAT <b>TAA</b> GCTACATTAGTTACAGATATCACAAACTATAATAGT | 898 |
| DSM-29683     | TGGTCAGTTGGTAAAAATCTAT <b>TAA</b> GCTACATTAGTTACAGATATCACAAACTATAATAGT | 898 |
| DSM-29684     | TGGTCAGTTGGTAAAAATCTAT <b>TAA</b> GCTACATTAGTTACAGATATCACAAACTATAATAGT | 898 |
| DSM-29685     | TGGTCAGTTGGTAAAAATCTAT <b>TAA</b> GCTACATTAGTTACAGATATCACAAACTATAATAGT | 898 |
| DSM-29686     | TGGTCAGTTGGTAAAAATCTAT <b>TAA</b> GCTACATTAGTTACAGATATCACAAACTATAATAGT | 898 |
| DSM-29089     | TGGTCAGTTGGTAAAAATCTAT <b>TAA</b> GCTACATTAGTTACAGATATCACAAACTATAATAGT | 898 |
| DSM-29689     | TGGTCAGTTGGTAAAAATCTAT <b>TAA</b> GCTACATTAGTTACAGATATCACAAACTATAATAGT | 898 |
| DSM-29692     | TGGTCAGTTGGTAAAAATCTAT <b>TAA</b> GCTACATTAGTTACAGATATCACAAACTATAATAGT | 898 |
| DSM-29091     | TGGTCAGTTGGTAAAAATCTAT <b>TAA</b> GCTACATTAGTTACAGATATCACAAACTATAATAGT | 898 |
| 630           | TGGTCAGTTGGTAAAAATCTAT <b>TAA</b> GCTACATTAGTTACAGATATCACAAACTATAATAGT | 898 |
| 630-delta-erm | TGGTCAGTTGGTAAAAATCTAT <b>TAA</b> GCTACATTAGTTACAGATATCACAAACTATAATAGT | 898 |
| DSM-29744     | TGGTCAGTTGGTAAAAATCTAT <b>TAA</b> GCTACATTAGTTACAGATATCACAAACTATAATAGT | 898 |
| DSM-29745     | TGGTCAGTTGGTAAAAATCTAT <b>TAA</b> GCTACATTAGTTACAGATATCACAAACTATAATAGT | 898 |
| DSM-29754     | TGGTCAGTTGGTAAAAATCTAT <b>TAA</b> GCTACATTAGTTACAGATATCACAAACTATAATAGT | 898 |
| DSM-29687     | TGGTCAGTTGGTAAAAATCTAT <b>TAA</b> GCTACATTAGTTACAGATATCACAAACTATAATAGT | 898 |
| DSM-29690     | TGGTCAGTTGGTAAAAATCTAT <b>TAA</b> GCTACATTAGTTACAGATATCACAAACTATAATAGT | 898 |
| DSM-29691     | TGGTCAGTTGGTAAAAATCTAT <b>TAA</b> GCTACATTAGTTACAGATATCACAAACTATAATAGT | 898 |
| DSM-29092     | TGGTCAGTTGGTAAAAATCTAT <b>TAA</b> GCTACATTAGTTACAGATATCACAAACTATAATAGT | 898 |
| DSM-29093     | TGGTCAGTTGGTAAAAATCTAT <b>TAA</b> GCTACATTAGTTACAGATATCACAAACTATAATAGT | 898 |
| DSM-29756     | TGGTCAGTTGGTAAAAATCTAT <b>TAA</b> GCTACATTAGTTACAGATATCACAAACTATAATAGT | 898 |
| DSM-29094     | TGGTCAGTTGGTAAAAATCTAT <b>TAA</b> GCTACATTAGTTACAGATATCACAAACTATAATAGT | 898 |
| 2007855       | TGGTCAGTTGGTAAAAATCTAT <b>TAA</b> GCTACATTAGTTACAGATATCACAAACTATAATAGT | 898 |
| BI1           | TGGTCAGTTGGTAAAAATCTAT <b>TAA</b> GCTACATTAGTTACAGATATCACAAACTATAATAGT | 898 |
| DSM-28196     | TGGTCAGTTGGTAAAAATCTAT <b>TAA</b> GCTACATTAGTTACAGATATCACAAACTATAATAGT | 898 |
| DSM-27638     | TGGTCAGTTGGTAAAAATCTAT <b>TAA</b> GCTACATTAGTTACAGATATCACAAACTATAATAGT | 898 |
| DSM-27640     | TGGTCAGTTGGTAAAAATCTAT <b>TAA</b> GCTACATTAGTTACAGATATCACAAACTATAATAGT | 898 |
| DSM-29680     | TGGTCAGTTGGTAAAAATCTAT <b>TAA</b> GCTACATTAGTTACAGATATCACAAACTATAATAGT | 898 |
| R20291        | TGGTCAGTTGGTAAAAATCTAT <b>TAA</b> GCTACATTAGTTACAGATATCACAAACTATAATAGT | 898 |
| DSM-29747     | TGGTCAGTTGGTAAAAATCTAT <b>TAA</b> GCTACATTAGTTACAGATATCACAAACTATAATAGT | 898 |
| DSM-29752     | TGGTCAGTTGGTAAAAATCTAT <b>TAA</b> GCTACATTAGTTACAGATATCACAAACTATAATAGT | 898 |
| DSM-29753     | TGGTCAGTTGGTAAAAATCTAT <b>TAA</b> GCTACATTAGTTACAGATATCACAAACTATAATAGT | 898 |
| M120          | TGGTCAGTTGGTAAAAATCTAT <b>TAA</b> GCTACATTAGTTACAGATATCACAAACTATAATAGT | 898 |

\*\*\*\*\*

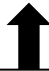

*tcdL* translational stop



Supplementary Material

|               |                                                              |      |
|---------------|--------------------------------------------------------------|------|
| M68           | TGAAGGACAAAATGATAGAGAAAATAAGTATCAAACCTTAATAAATGATTTAATTGATAG | 1018 |
| CF5           | TGAAGGACAAAATGATAGAGAAAATAAGTATCAAACCTTAATAAATGATTTAATTGATAG | 1018 |
| DSM-29095     | TGAAGGACAAAATGATATAGAAAATAAGTATCAAACCTTAATAAATGATTTAATTGATAG | 1018 |
| DSM-29090     | TGAAGGACAAAATGATATAGAAAATAAGTATCAAACCTTAATAAATGATTTAATTGATAG | 1018 |
| DSM-28194     | TGAAGGACAAAATGATATAGAAAATAAGTATCAAACCTTAATAAATGATTTAATTGATAG | 1018 |
| DSM-28197     | TGAAGGACAAAATGATATAGAAAATAAGTATCAAACCTTAATAAATGATTTAATTGATAG | 1018 |
| DSM-1296T     | TGAAGGACAAAATGATATAGAAAATAAGTATCAAACCTTAATAAATGATTTAATTGATAG | 1018 |
| DSM-27639     | TGAAGGACAAAATGATATAGAAAATAAGTATCAAACCTTAATAAATGATTTAATTGATAG | 1018 |
| DSM-29675     | TGAAGGACAAAATGATATAGAAAATAAGTATCAAACCTTAATAAATGATTTAATTGATAG | 1018 |
| DSM-29676     | TGAAGGACAAAATGATATAGAAAATAAGTATCAAACCTTAATAAATGATTTAATTGATAG | 1018 |
| DSM-29677     | TGAAGGACAAAATGATATAGAAAATAAGTATCAAACCTTAATAAATGATTTAATTGATAG | 1018 |
| DSM-29678     | TGAAGGACAAAATGATATAGAAAATAAGTATCAAACCTTAATAAATGATTTAATTGATAG | 1018 |
| DSM-29679     | TGAAGGACAAAATGATATAGAAAATAAGTATCAAACCTTAATAAATGATTTAATTGATAG | 1018 |
| DSM-29683     | TGAAGGACAAAATGATATAGAAAATAAGTATCAAACCTTAATAAATGATTTAATTGATAG | 1018 |
| DSM-29684     | TGAAGGACAAAATGATATAGAAAATAAGTATCAAACCTTAATAAATGATTTAATTGATAG | 1018 |
| DSM-29685     | TGAAGGACAAAATGATATAGAAAATAAGTATCAAACCTTAATAAATGATTTAATTGATAG | 1018 |
| DSM-29686     | TGAAGGACAAAATGATATAGAAAATAAGTATCAAACCTTAATAAATGATTTAATTGATAG | 1018 |
| DSM-29089     | TGAAGGACAAAATGATATAGAAAATAAGTATCAAACCTTAATAAATGATTTAATTGATAG | 1018 |
| DSM-29689     | TGAAGGACAAAATGATATAGAAAATAAGTATCAAACCTTAATAAATGATTTAATTGATAG | 1018 |
| DSM-29692     | TGAAGGACAAAATGATATAGAAAATAAGTATCAAACCTTAATAAATGATTTAATTGATAG | 1018 |
| DSM-29091     | TGAAGGACAAAATGATATAGAAAATAAGTATCAAACCTTAATAAATGATTTAATTGATAG | 1018 |
| 630           | TGAAGGACAAAATGATATAGAAAATAAGTATCAAACCTTAATAAATGATTTAATTGATAG | 1018 |
| 630-delta-erm | TGAAGGACAAAATGATATAGAAAATAAGTATCAAACCTTAATAAATGATTTAATTGATAG | 1018 |
| DSM-29744     | TGAAGGACAAAATGATATAGAAAATAAGTATCAAACCTTAATAAATGATTTAATTGATAG | 1018 |
| DSM-29745     | TGAAGGACAAAATGATATAGAAAATAAGTATCAAACCTTAATAAATGATTTAATTGATAG | 1018 |
| DSM-29754     | TGAAGGACAAAATGATATAGAAAATAAGTATCAAACCTTAATAAATGATTTAATTGATAG | 1018 |
| DSM-29687     | TGAAGGACAAAATGATATAGAAAATAAGTATCAAACCTTAATAAATGATTTAATTGATAG | 1018 |
| DSM-29690     | TGAAGGACAAAATGATATAGAAAATAAGTATCAAACCTTAATAAATGATTTAATTGATAG | 1018 |
| DSM-29691     | TGAAGGACAAAATGATATAGAAAATAAGTATCAAACCTTAATAAATGATTTAATTGATAG | 1018 |
| DSM-29092     | TGAAGGACAAAATGATATAGAAAATAAGTATCAAACCTTAATAAATGATTTAATTGATAG | 1018 |
| DSM-29093     | TGAAGGACAAAATGATATAGAAAATAAGTATCAAACCTTAATAAATGATTTAATTGATAG | 1018 |
| DSM-29756     | TGAAGGACAAAATGATATAGAAAATAAGTATCAAACCTTAATAAATGATTTAATTGATAG | 1018 |
| DSM-29094     | TGAAGGACAAAATGATATAGAAAATAAGTATCAAACCTTAATAAATGATTTAATTGATAG | 1018 |
| 2007855       | TGAAGGACAAAATGATAGAGAAAATAAGTATCAAACCTTAATAAATGATTTAATTGATAG | 1018 |
| BI1           | TGAAGGACAAAATGATAGAGAAAATAAGTATCAAACCTTAATAAATGATTTAATTGATAG | 1018 |
| DSM-28196     | TGAAGGACAAAATGATAGAGAAAATAAGTATCAAACCTTAATAAATGATTTAATTGATAG | 1018 |
| DSM-27638     | TGAAGGACAAAATGATAGAGAAAATAAGTATCAAACCTTAATAAATGATTTAATTGATAG | 1018 |
| DSM-27640     | TGAAGGACAAAATGATAGAGAAAATAAGTATCAAACCTTAATAAATGATTTAATTGATAG | 1018 |
| DSM-29680     | TGAAGGACAAAATGATAGAGAAAATAAGTATCAAACCTTAATAAATGATTTAATTGATAG | 1018 |
| R20291        | TGAAGGACAAAATGATAGAGAAAATAAGTATCAAACCTTAATAAATGATTTAATTGATAG | 1018 |
| DSM-29747     | TGAAGGACAAAATGATAGAGAAAATAAGTATCAAACCTTAATAAATGATTTAATTGATAG | 1018 |
| DSM-29752     | TGAAGGACAAAATGATAGAGAAAATAAGTATCAAACCTTAATAAATGATTTAATTGATAG | 1018 |
| DSM-29753     | TGAAGGACAAAATGATAGAGAAAATAAGTATCAAACCTTAATAAATGATTTAATTGATAG | 1018 |
| M120          | TGAAGGACAAAATGATAGAGAAAATAAGTATCAAACCTTAATAAATGATTTAATTGATAG | 1018 |
|               | *****                                                        |      |



Supplementary Material

|               |                                                               |      |
|---------------|---------------------------------------------------------------|------|
| M68           | -----TTCTATCATACAATCTCCTTATCTAATAGAAGAGTCAATTAAC TAATTGAG     | 1129 |
| CF5           | -----TTCTATCATACAATCTCCTTATCTAATAGAAGAGTCAATTAAC TAATTGAG     | 1129 |
| DSM-29095     | TTTACAAATTACTATCAGACAATCTCCTTATCTAATAGAAGAGTCAATTAAC TAATTGAG | 1138 |
| DSM-29090     | TTTACAAATTACTATCAGACAATCTCCTTATCTAATAGAAGAGTCAATTAAC TAATTGAG | 1138 |
| DSM-28194     | TTTACAAATTACTATCAGACAATCTCCTTATCTAATAGAAGAGTCAATTAAC TAATTGAG | 1138 |
| DSM-28197     | TTTACAAATTACTATCAGACAATCTCCTTATCTAATAGAAGAGTCAATTAAC TAATTGAG | 1138 |
| DSM-1296T     | TTTACAAATTACTATCAGACAATCTCCTTATCTAATAGAAGAGTCAATTAAC TAATTGAG | 1138 |
| DSM-27639     | TTTACAAATTACTATCAGACAATCTCCTTATCTAATAGAAGAGTCAATTAAC TAATTGAG | 1138 |
| DSM-29675     | TTTACAAATTACTATCAGACAATCTCCTTATCTAATAGAAGAGTCAATTAAC TAATTGAG | 1138 |
| DSM-29676     | TTTACAAATTACTATCAGACAATCTCCTTATCTAATAGAAGAGTCAATTAAC TAATTGAG | 1138 |
| DSM-29677     | TTTACAAATTACTATCAGACAATCTCCTTATCTAATAGAAGAGTCAATTAAC TAATTGAG | 1138 |
| DSM-29678     | TTTACAAATTACTATCAGACAATCTCCTTATCTAATAGAAGAGTCAATTAAC TAATTGAG | 1138 |
| DSM-29679     | TTTACAAATTACTATCAGACAATCTCCTTATCTAATAGAAGAGTCAATTAAC TAATTGAG | 1138 |
| DSM-29683     | TTTACAAATTACTATCAGACAATCTCCTTATCTAATAGAAGAGTCAATTAAC TAATTGAG | 1138 |
| DSM-29684     | TTTACAAATTACTATCAGACAATCTCCTTATCTAATAGAAGAGTCAATTAAC TAATTGAG | 1138 |
| DSM-29685     | TTTACAAATTACTATCAGACAATCTCCTTATCTAATAGAAGAGTCAATTAAC TAATTGAG | 1138 |
| DSM-29686     | TTTACAAATTACTATCAGACAATCTCCTTATCTAATAGAAGAGTCAATTAAC TAATTGAG | 1138 |
| DSM-29089     | TTTACAAATTACTATCAGACAATCTCCTTATCTAATAGAAGAGTCAATTAAC TAATTGAG | 1138 |
| DSM-29689     | TTTACAAATTACTATCAGACAATCTCCTTATCTAATAGAAGAGTCAATTAAC TAATTGAG | 1138 |
| DSM-29692     | TTTACAAATTACTATCAGACAATCTCCTTATCTAATAGAAGAGTCAATTAAC TAATTGAG | 1138 |
| DSM-29091     | TTTACAAATTACTATCAGACAATCTCCTTATCTAATAGAAGAGTCAATTAAC TAATTGAG | 1138 |
| 630           | TTTACAAATTACTATCAGACAATCTCCTTATCTAATAGAAGAGTCAATTAAC TAATTGAG | 1138 |
| 630-delta-erm | TTTACAAATTACTATCAGACAATCTCCTTATCTAATAGAAGAGTCAATTAAC TAATTGAG | 1138 |
| DSM-29744     | TTTACAAATTACTATCAGACAATCTCCTTATCTAATAGAAGAGTCAATTAAC TAATTGAG | 1138 |
| DSM-29745     | TTTACAAATTACTATCAGACAATCTCCTTATCTAATAGAAGAGTCAATTAAC TAATTGAG | 1138 |
| DSM-29754     | TTTACAAATTACTATCAGACAATCTCCTTATCTAATAGAAGAGTCAATTAAC TAATTGAG | 1138 |
| DSM-29687     | TTTACAAATTACTATCAGACAATCTCCTTATCTAATAGAAGAGTCAATTAAC TAATTGAG | 1138 |
| DSM-29690     | TTTACAAATTACTATCAGACAATCTCCTTATCTAATAGAAGAGTCAATTAAC TAATTGAG | 1138 |
| DSM-29691     | TTTACAAATTACTATCAGACAATCTCCTTATCTAATAGAAGAGTCAATTAAC TAATTGAG | 1138 |
| DSM-29092     | TTTACAAATTACTATCAGACAATCTCCTTATCTAATAGAAGAGTCAATTAAC TAATTGAG | 1138 |
| DSM-29093     | TTTACAAATTACTATCAGACAATCTCCTTATCTAATAGAAGAGTCAATTAAC TAATTGAG | 1138 |
| DSM-29756     | TTTACAAATTACTATCAGACAATCTCCTTATCTAATAGAAGAGTCAATTAAC TAATTGAG | 1138 |
| DSM-29094     | TTTACAAATTACTATCAGACAATCTCCTTATCTAATAGAAGAGTCAATTAAC TAATTGAG | 1138 |
| 2007855       | TTTACAAATTACTATCAGACAATCTCCTTATCTAATAGAAGAGTCAATTAAC TAATTGAG | 1138 |
| BI1           | TTTACAAATTACTATCAGACAATCTCCTTATCTAATAGAAGAGTCAATTAAC TAATTGAG | 1138 |
| DSM-28196     | TTTACAAATTACTATCAGACAATCTCCTTATCTAATAGAAGAGTCAATTAAC TAATTGAG | 1138 |
| DSM-27638     | TTTACAAATTACTATCAGACAATCTCCTTATCTAATAGAAGAGTCAATTAAC TAATTGAG | 1138 |
| DSM-27640     | TTTACAAATTACTATCAGACAATCTCCTTATCTAATAGAAGAGTCAATTAAC TAATTGAG | 1138 |
| DSM-29680     | TTTACAAATTACTATCAGACAATCTCCTTATCTAATAGAAGAGTCAATTAAC TAATTGAG | 1138 |
| R20291        | TTTACAAATTACTATCAGACAATCTCCTTATCTAATAGAAGAGTCAATTAAC TAATTGAG | 1138 |
| DSM-29747     | TTTACAAATTACTATCAGACAATCTCCTTATCTAATAGAAGAGTCAATTAAC TAATTGAG | 1138 |
| DSM-29752     | TTTACAAATTACTATCAGACAATCTCCTTATCTAATAGAAGAGTCAATTAAC TAATTGAG | 1138 |
| DSM-29753     | TTTACAAATTACTATCAGACAATCTCCTTATCTAATAGAAGAGTCAATTAAC TAATTGAG | 1138 |
| M120          | TTTACAAATTACTATCAGACAATCTCCTTATCTAATAGAAGAGTCAATTAAC TAATTGAG | 1138 |

\* \* \* \* \*



Supplementary Material

|               |                                                             |      |
|---------------|-------------------------------------------------------------|------|
| M68           | CAATATTAATTTATTTTAAAAAATAGAAAGGAGTGTATAAGATTTATTTTCAAAGTTTA | 1249 |
| CF5           | CAATATTAATTTATTTTAAAAAATAGAAAGGAGTGTATAAGATTTATTTTCAAAGTTTA | 1249 |
| DSM-29095     | CAATATTAATTTATTTTAAAAAATAGAAAGGAGTGTATAAGATTTATTTTCAAAGTTTA | 1258 |
| DSM-29090     | CAATATTAATTTATTTTAAAAAATAGAAAGGAGTGTATAAGATTTATTTTCAAAGTTTA | 1258 |
| DSM-28194     | CAATATTAATTTATTTTAAAAAATAGAAAGGAGTGTATAAGATTTATTTTCAAAGTTTA | 1258 |
| DSM-28197     | CAATATTAATTTATTTTAAAAAATAGAAAGGAGTGTATAAGATTTATTTTCAAAGTTTA | 1258 |
| DSM-1296T     | CAATATTAATTTATTTTAAAAAATAGAAAGGAGTGTATAAGATTTATTTTCAAAGTTTA | 1258 |
| DSM-27639     | CAATATTAATTTATTTTAAAAAATAGAAAGGAGTGTATAAGATTTATTTTCAAAGTTTA | 1258 |
| DSM-29675     | CAATATTAATTTATTTTAAAAAATAGAAAGGAGTGTATAAGATTTATTTTCAAAGTTTA | 1258 |
| DSM-29676     | CAATATTAATTTATTTTAAAAAATAGAAAGGAGTGTATAAGATTTATTTTCAAAGTTTA | 1258 |
| DSM-29677     | CAATATTAATTTATTTTAAAAAATAGAAAGGAGTGTATAAGATTTATTTTCAAAGTTTA | 1258 |
| DSM-29678     | CAATATTAATTTATTTTAAAAAATAGAAAGGAGTGTATAAGATTTATTTTCAAAGTTTA | 1258 |
| DSM-29679     | CAATATTAATTTATTTTAAAAAATAGAAAGGAGTGTATAAGATTTATTTTCAAAGTTTA | 1258 |
| DSM-29683     | CAATATTAATTTATTTTAAAAAATAGAAAGGAGTGTATAAGATTTATTTTCAAAGTTTA | 1258 |
| DSM-29684     | CAATATTAATTTATTTTAAAAAATAGAAAGGAGTGTATAAGATTTATTTTCAAAGTTTA | 1258 |
| DSM-29685     | CAATATTAATTTATTTTAAAAAATAGAAAGGAGTGTATAAGATTTATTTTCAAAGTTTA | 1258 |
| DSM-29686     | CAATATTAATTTATTTTAAAAAATAGAAAGGAGTGTATAAGATTTATTTTCAAAGTTTA | 1258 |
| DSM-29089     | CAATATTAATTTATTTTAAAAAATAGAAAGGAGTGTATAAGATTTATTTTCAAAGTTTA | 1258 |
| DSM-29689     | CAATATTAATTTATTTTAAAAAATAGAAAGGAGTGTATAAGATTTATTTTCAAAGTTTA | 1258 |
| DSM-29692     | CAATATTAATTTATTTTAAAAAATAGAAAGGAGTGTATAAGATTTATTTTCAAAGTTTA | 1258 |
| DSM-29091     | CAATATTAATTTATTTTAAAAAATAGAAAGGAGTGTATAAGATTTATTTTCAAAGTTTA | 1258 |
| 630           | CAATATTAATTTATTTTAAAAAATAGAAAGGAGTGTATAAGATTTATTTTCAAAGTTTA | 1258 |
| 630-delta-erm | CAATATTAATTTATTTTAAAAAATAGAAAGGAGTGTATAAGATTTATTTTCAAAGTTTA | 1258 |
| DSM-29744     | CAATATTAATTTATTTTAAAAAATAGAAAGGAGTGTATAAGATTTATTTTCAAAGTTTA | 1258 |
| DSM-29745     | CAATATTAATTTATTTTAAAAAATAGAAAGGAGTGTATAAGATTTATTTTCAAAGTTTA | 1258 |
| DSM-29754     | CAATATTAATTTATTTTAAAAAATAGAAAGGAGTGTATAAGATTTATTTTCAAAGTTTA | 1258 |
| DSM-29687     | CAATATTAATTTATTTTAAAAAATAGAAAGGAGTGTATAAGATTTATTTTCAAAGTTTA | 1258 |
| DSM-29690     | CAATATTAATTTATTTTAAAAAATAGAAAGGAGTGTATAAGATTTATTTTCAAAGTTTA | 1258 |
| DSM-29691     | CAATATTAATTTATTTTAAAAAATAGAAAGGAGTGTATAAGATTTATTTTCAAAGTTTA | 1258 |
| DSM-29092     | CAATATTAATTTATTTTAAAAAATAGAAAGGAGTGTATAAGATTTATTTTCAAAGTTTA | 1258 |
| DSM-29093     | CAATATTAATTTATTTTAAAAAATAGAAAGGAGTGTATAAGATTTATTTTCAAAGTTTA | 1258 |
| DSM-29756     | CAATATTAATTTATTTTAAAAAATAGAAAGGAGTGTATAAGATTTATTTTCAAAGTTTA | 1258 |
| DSM-29094     | CAATATTAATTTATTTTAAAAAATAGAAAGGAGTGTATAAGATTTATTTTCAAAGTTTA | 1258 |
| 2007855       | CAATATTAATTTATTTTAAAAAATAGAAAGGAGTGTATAAGATTTATTTTCAAAGTTTA | 1258 |
| BI1           | CAATATTAATTTATTTTAAAAAATAGAAAGGAGTGTATAAGATTTATTTTCAAAGTTTA | 1258 |
| DSM-28196     | CAATATTAATTTATTTTAAAAAATAGAAAGGAGTGTATAAGATTTATTTTCAAAGTTTA | 1258 |
| DSM-27638     | CAATATTAATTTATTTTAAAAAATAGAAAGGAGTGTATAAGATTTATTTTCAAAGTTTA | 1258 |
| DSM-27640     | CAATATTAATTTATTTTAAAAAATAGAAAGGAGTGTATAAGATTTATTTTCAAAGTTTA | 1258 |
| DSM-29680     | CAATATTAATTTATTTTAAAAAATAGAAAGGAGTGTATAAGATTTATTTTCAAAGTTTA | 1258 |
| R20291        | CAATATTAATTTATTTTAAAAAATAGAAAGGAGTGTATAAGATTTATTTTCAAAGTTTA | 1258 |
| DSM-29747     | CAATATTAATTTATTTTAAAAAATAGAAAGGAGTGTATAAGATTTATTTTCAAAGTTTA | 1258 |
| DSM-29752     | CAATATTAATTTATTTTAAAAAATAGAAAGGAGTGTATAAGATTTATTTTCAAAGTTTA | 1258 |
| DSM-29753     | CAATATTAATTTATTTTAAAAAATAGAAAGGAGTGTATAAGATTTATTTTCAAAGTTTA | 1258 |
| M120          | CAATATTAATTTATTTTAAAAAATAGAAAGGAGTGTATAAGATTTATTTTCAAAGTTTA | 1258 |
|               | ***** ** *****                                              |      |





|               |                              |      |
|---------------|------------------------------|------|
| M68           | TTATCAAAAATAATAACTAGGAGGTTTT | 1340 |
| CF5           | TTATCAAAAATAATAACTAGGAGGTTTT | 1340 |
| DSM-29095     | TTATCAAAAATAATAACTAGGAGGTTTT | 1349 |
| DSM-29090     | TTATCAAAAATAATAACTAGGAGGTTTT | 1349 |
| DSM-28194     | TTATCAAAAATAATAACTAGGAGGTTTT | 1349 |
| DSM-28197     | TTATCAAAAATAATAACTAGGAGGTTTT | 1349 |
| DSM-1296T     | TTATCAAAAATAATAACTAGGAGGTTTT | 1349 |
| DSM-27639     | TTATCAAAAATAATAACTAGGAGGTTTT | 1349 |
| DSM-29675     | TTATCAAAAATAATAACTAGGAGGTTTT | 1349 |
| DSM-29676     | TTATCAAAAATAATAACTAGGAGGTTTT | 1349 |
| DSM-29677     | TTATCAAAAATAATAACTAGGAGGTTTT | 1349 |
| DSM-29678     | TTATCAAAAATAATAACTAGGAGGTTTT | 1349 |
| DSM-29679     | TTATCAAAAATAATAACTAGGAGGTTTT | 1349 |
| DSM-29683     | TTATCAAAAATAATAACTAGGAGGTTTT | 1349 |
| DSM-29684     | TTATCAAAAATAATAACTAGGAGGTTTT | 1349 |
| DSM-29685     | TTATCAAAAATAATAACTAGGAGGTTTT | 1349 |
| DSM-29686     | TTATCAAAAATAATAACTAGGAGGTTTT | 1349 |
| DSM-29089     | TTATCAAAAATAATAACTAGGAGGTTTT | 1349 |
| DSM-29689     | TTATCAAAAATAATAACTAGGAGGTTTT | 1349 |
| DSM-29692     | TTATCAAAAATAATAACTAGGAGGTTTT | 1349 |
| DSM-29091     | TTATCAAAAATAATAACTAGGAGGTTTT | 1349 |
| 630           | TTATCAAAAATAATAACTAGGAGGTTTT | 1349 |
| 630-delta-erm | TTATCAAAAATAATAACTAGGAGGTTTT | 1349 |
| DSM-29744     | TTATCAAAAATAATAACTAGGAGGTTTT | 1349 |
| DSM-29745     | TTATCAAAAATAATAACTAGGAGGTTTT | 1349 |
| DSM-29754     | TTATCAAAAATAATAACTAGGAGGTTTT | 1349 |
| DSM-29687     | TTATCAAAAATAATAACTAGGAGGTTTT | 1349 |
| DSM-29690     | TTATCAAAAATAATAACTAGGAGGTTTT | 1349 |
| DSM-29691     | TTATCAAAAATAATAACTAGGAGGTTTT | 1349 |
| DSM-29092     | TTATCAAAAATAATAACTAGGAGGTTTT | 1349 |
| DSM-29093     | TTATCAAAAATAATAACTAGGAGGTTTT | 1349 |
| DSM-29756     | TTATCAAAAATAATAACTAGGAGGTTTT | 1349 |
| DSM-29094     | TTATCAAAAATAATAACTAGGAGGTTTT | 1349 |
| 2007855       | TTATCAAAAATAATACTAGGAGGTTTT  | 1349 |
| BI1           | TTATCAAAAATAATACTAGGAGGTTTT  | 1349 |
| DSM-28196     | TTATCAAAAATAATACTAGGAGGTTTT  | 1349 |
| DSM-27638     | TTATCAAAAATAATACTAGGAGGTTTT  | 1349 |
| DSM-27640     | TTATCAAAAATAATACTAGGAGGTTTT  | 1349 |
| DSM-29680     | TTATCAAAAATAATACTAGGAGGTTTT  | 1349 |
| R20291        | TTATCAAAAATAATACTAGGAGGTTTT  | 1349 |
| DSM-29747     | TTATCAAAAATAATAACTAGGAGGTTTT | 1349 |
| DSM-29752     | TTATCAAAAATAATAACTAGGAGGTTTT | 1349 |
| DSM-29753     | TTATCAAAAATAATAACTAGGAGGTTTT | 1349 |
| M120          | TTATCAAAAATAATAACTAGGAGGTTTT | 1349 |
|               | *****                        |      |

**(B)**

>2007855

ATAAAAATACGTTAAATATATCCTCTTATACTTAAATATATAAAAAATAACAAAATGATACACTACATAAAAGTGTTCATCTAATATGAA  
GATTTACCAATAAAAAGGTGAACTATGATGAATGCACAGTAGTTCACCTTTTTATATTTCTAATGGTAACAAAATATTTTTTTATATAAAA  
CCTAGGAGGCGTTATGAATATGACAATATCTTTTTTATCAGAGCATATATTTATAAAAGTTAGTAATTTTAACTATATCATTGATACATT  
ATTAGGATGTTTAAAGTGCAATAAAAAGTCGTAAATTTAATTTCTAGTTTTGGAAATAGATGGAGGAATCAGAAAAGTAGCAATGATAGCATG  
TATATTTTTTTTTATCAGTAGTTGACATTCTTACAAAGTTTAACTTTTTATTTATGTTACCACAAGATTGTATCAATTTTTTAAAGACTAAA  
ACATCTTGGAAATATCTGAATTTTTCTCTATTTTTATTTATTTTATATGAAAGTGAAGCATATTAaaaaaatATGTGCTTATGTGGATTACC  
AGTACCTAAGAGATTAAGGAAAAAATAGCAGTTTTACTAGATGCAATGACAGATGAAATGAATGCTAAGGATGAAAAGTAAGTAATGGT  
AGATATAATAAAAAATATTAACAAATAAAAAGTGTATCCAAATAAGAATAGCTGAAAAGTTATCATAATTCATGAAACTGATAATGAAAAC  
GAGGGAGCAGATGCCAAGAGACACACAAGTATTAATAACATATAATTTTGAAGCAAGTGTTCATTACTATATGGATGACAAGGTAGTATA  
TCAAACATTGGTTCACAAAGATGGTGCATGGTCAGTTGGTAAAAATCTATTAAGCTACATTAGTTACAGATATCACAACTATAATAGTTA  
AACATAGAAAATATGTGTAATTTGTGATGGAAATTTATTCAAAAACACAAAAATACGTGATGAAGGACAAAATGATAGAGAAAAAAGTATC  
AAACCTTAATAAATGATTTAATTTGATAGTTTTAAAAGTTATAGGAAAAATATATAAAGAAATAAAAACATTAaaaaaatATAAGATATGTT  
TACAAATTACTATCAGACAATCTCCTTATCTAATAGAAGAGTCAATTAACAAATTGAGTATCTTTAAATGAAATGTTAGGAAGTGATTT  
AAATATGAAAACCTAAATTATAAAAAATCAATATTAATTTATCTTTAAAAAATAGAAAGGAGTGTATAAGATTTATTTTCAAAGTTTAAA  
ACAAGAAAATCAATTTAAATTTTTCAGAAGGAATAAATGTGGTTATAGAAGTGGATTTATTATCAAAAATAATAGTACTAGGAGGTTTTT

>BI1

ATAAAAATACGTTAAATATATCCTCTTATACTTAAATATATAAAAAATAACAAAATGATACACTACATAAAAGTGTTCATCTAATATGAA  
GATTTACCAATAAAAAGGTGAACTATGATGAATGCACAGTAGTTCACCTTTTTATATTTCTAATGGTAACAAAATATTTTTTTATATAAAA  
CCTAGGAGGCGTTATGAATATGACAATATCTTTTTTATCAGAGCATATATTTATAAAAGTTAGTAATTTTAACTATATCATTGATACATT  
ATTAGGATGTTTAAAGTGCAATAAAAAGTCGTAAATTTAATTTCTAGTTTTGGAAATAGATGGAGGAATCAGAAAAGTAGCAATGATAGCATG  
TATATTTTTTTTTATCAGTAGTTGACATTCTTACAAAGTTTAACTTTTTATTTATGTTACCACAAGATTGTATCAATTTTTTAAAGACTAAA  
ACATCTTGGAAATATCTGAATTTTTCTCTATTTTTATTTATTTTATATGAAAGTGAAGCATATTAaaaaaatATGTGCTTATGTGGATTACC  
AGTACCTAAGAGATTAAGGAAAAAATAGCAGTTTTACTAGATGCAATGACAGATGAAATGAATGCTAAGGATGAAAAGTAAGTAATGGT  
AGATATAATAAAAAATATTAACAAATAAAAAGTGTATCCAAATAAGAATAGCTGAAAAGTTATCATAATTCATGAAACTGATAATGAAAAC  
GAGGGAGCAGATGCCAAGAGACACACAAGTATTAATAACATATAATTTTGAAGCAAGTGTTCATTACTATATGGATGACAAGGTAGTATA  
TCAAACATTGGTTCACAAAGATGGTGCATGGTCAGTTGGTAAAAATCTATTAAGCTACATTAGTTACAGATATCACAACTATAATAGTTA  
AACATAGAAAATATGTGTAATTTGTGATGGAAATTTATTCAAAAACACAAAAATACGTGATGAAGGACAAAATGATAGAGAAAAAAGTATC  
AAACCTTAATAAATGATTTAATTTGATAGTTTTAAAAGTTATAGGAAAAATATATAAAGAAATAAAAACATTAaaaaaatATAAGATATGTT  
TACAAATTACTATCAGACAATCTCCTTATCTAATAGAAGAGTCAATTAACAAATTGAGTATCTTTAAATGAAATGTTAGGAAGTGATTT  
AAATATGAAAACCTAAATTATAAAAAATCAATATTAATTTATCTTTAAAAAATAGAAAGGAGTGTATAAGATTTATTTTCAAAGTTTAAA  
ACAAGAAAATCAATTTAAATTTTTCAGAAGGAATAAATGTGGTTATAGAAGTGGATTTATTATCAAAAATAATAGTACTAGGAGGTTTTT

>DSM-29095

ATAAAAATATGTTAAATATATCCTCTTATACTTAAATATATAAAAAATAACAAAATGATACACTACATAAAAGTGTTCATCTAATATGAA  
GATTTACCAATAAAAAGGTGGACTATGATGAATGCACAGTAGTTCACCTTTTTATATTTCTAATGGTAACAAAATATTTTTTTATATAAAA  
CCTAGGAGGCGTTATGAATATGACAATATCTTTTTTATCAGAGCATATATTTATAAAAGTTAGTAATTTTAACTATATCATTGATACATT  
ATTAGGATGTTTAAAGTGCAATAAAAAGTCGTAAATTTAATTTCTAGTTTTGGAAATAGATGGAGGAATCAGAAAAGTAGCAATGATAGCATG  
TATATTTTTTTTTATCAGTAGTTGACATTCTTACAAAGTTTAACTTTTTATTTATGTTACCACAAGATTGTATCAATTTTTTAAAGACTAAA  
ACATCTTGGAAATATCTGAATTTTTCTCTATTTTTATTTATTTTATATGAAAGTGAAGTATATTAaaaaaatATGTGCTTATGTGGATTACC  
AGTACCTAAGAGATTAAGGAAAAAATAGCAATTTTTACTAGATGCAATGACAGATGAAATGAATGCTAAGGATGAAAAGTAAGTAATGGT  
AGATATAATAAAGATATTAACAAATAAAAAGTGTATCCAAATAAGAATAGCTGAAAAGTTATCATAATTCATGAAACTAATAATGAAAAC  
GAGGGAGCAGATGCCAAGAGACACACAAGTATTAATAACATATAATTTTGAAGCAAGTGTTCATTACTATATGATGACAAGGTAGTATA  
TCAAACATTGGTTCACAAAGATGGTGCATGGTCAGTTGGTAAAAATCTATTAAGCTACATTAGTTACAGATATCACAACTATAATAGTTA  
AACATAGAAAATATGTGTAATTTGTGATGGAAATTTATTCAAAAACACAAAAATACGTGATGAAGGACAAAATGATAGAGAAAAAAGTATC  
AAACCTTAATAAATGATTTAATTTGATAGTTTTAAAAGTTATAGGAAAAATATATAAAGAAATAAAAACATTAaaaaaatATAAGATATGTT  
TACAAATTACTATCAGACAATCTCCTTATCTAATAGAAGAGTCAATTAACAAATTGAGTATCTTTAAATGAAATGTTAGGAAGTGATTT  
AAATATGAAAACCTAAATTATAAAAAATCAATATTAATTTATTTTTAAAAAATAGAAAGGAGTGTATAAGATTTATTTTCAAAGTTTAAA  
ACAAGAAAATCAATTTAAATTTTTCAGAAGGAATAAATGTGGTTATAGAAGTGGATTTATTATCAAAAATAATAACTAGGAGGTTTTT

&gt;DSM-29090

ATAAAAATATGTTAAATATATCCTCTTATACTTAAATATATAAAAAATAACAAAATGATACACTACATAAAAGTGTCTATCTAATATGAA  
 GATTTACCAATAAAAAGGTGGACTATGATGAATGCACAGTAGTTCACCTTTTTATATTTCTAATGGTAACAAAATATTTTTTATATAAAA  
 CCTAGGAGGCGTTATGAATATGACAATATCTTTTTTATCAGAGCATATATTTATAAAGTTAGTAATTTTAACTATATCATTGATACATT  
 ATTAGGATGTTTAAAGTGAATAAAAAGTCGTAATTTAATTTCTAGTTTTGGAAATAGATGGAGGAATCAGAAAAGTAGCAATGATAGCATG  
 TATATTTTTTTTTATCAGTAGTTGACATTCCTTACAAAGTTTAACTTTTTATTATGTTACCACAAGATTGTATCAATTTTTTAAAGACTAAA  
 ACATCTTGGAAATATCTGAATTTTTCTCTATTTTTATTTATTTTATATGAAAGTGTAAAGTATATTAATAAATATGTGCTTATGTGGATTACC  
 AGTACCTAAGAGATTAAGGAAAAAATAGCAATTTTACTAGATGCAATGACAGATGAAATGAATGCTAAGGATGAAAAGTAAGTAATGGT  
 AGATATAATAAAGATATTAACAAATAAAAAGTGTATCCAAATAAGAATAGCTGAAAGTTATCATAATTCATGAAACTAATAATGAAAAC  
 GAGGGAGCAGATGCCAAGAGACACACAAGTATTAATAACATATAATTTTGAAGCAAGTGTTCATTACTATATAGATGACAAGGTAGTATA  
 TCAAAACATTGGTTCACAAAGATGGTGCATGGTCAGTTGGTAAAACTATTAAGCTACATTAGTTACAGATATCACAACTATAATAGTTA  
 AACATAGAAATATGTGTAATTTGTGATGGAAATTAATTCAAAAACACAAAAATACGTGATGAAGGACAAAATGATATAGAAAAAAGTATC  
 AAACCTTAATAAATGATTTAATGATAGTTTAAAAGTTATAGGAAAAATATAAAGAAATAAAAACATTAATAAATATAAGATATGTT  
 TACAAATTACTATCAGACAATCTCCTTATCTAATAGAAGAGTCAATTAACATAATTGAGTATCTTTAAATTGAAATGTTAGGAAGTGATTT  
 AAATATGAAAACCTAAATTATAAAAAATCAATATTAATTTATTTTTAAAAAATAGAAAGGAGTGTATAAGATTTATTTTCAAAGTTTAAA  
 AACAAGAAAATCAATTTAAATTTTTCAGAAGGAATAAATGTGGTTATAGAAGTGGATTTATTATCAAAAATAATAACTAGGAGGTTTTT

&gt;DSM-28194

ATAAAAATATGTTAAATATATCCTCTTATACTTAAATATATAAAAAATAACAAAATGATACACTACATAAAAGTGTCTATCTAATATGAA  
 GATTTACCAATAAAAAGGTGGACTATGATGAATGCACAGTAGTTCACCTTTTTATATTTCTAATGGTAACAAAATATTTTTTATATAAAA  
 CCTAGGAGGCGTTATGAATATGACAATATCTTTTTTATCAGAGCATATATTTATAAAGTTAGTAATTTTAACTATATCATTGATACATT  
 ATTAGGATGTTTAAAGTGAATAAAAAGTCGTAATTTAATTTCTAGTTTTGGAAATAGATGGAGGAATCAGAAAAGTAGCAATGATAGCATG  
 TATATTTTTTTTTATCAGTAGTTGACATTCCTTACAAAGTTTAACTTTTTATTATGTTACCACAAGATTGTATCAATTTTTTAAAGACTAAA  
 ACATCTTGGAAATATCTGAATTTTTCTCTATTTTTATTTATTTTATATGAAAGTGTAAAGTATATTAATAAATATGTGCTTATGTGGATTACC  
 AGTACCTAAGAGATTAAGGAAAAAATAGCAATTTTACTAGATGCAATGACAGATGAAATGAATGCTAAGGATGAAAAGTAAGTAATGGT  
 AGATATAATAAAGATATTAACAAATAAAAAGTGTATCCAAATAAGAATAGCTGAAAGTTATCATAATTCATGAAACTAATAATGAAAAC  
 GAGGGAGCAGATGCCAAGAGACACACAAGTATTAATAACATATAATTTTGAAGCAAGTGTTCATTACTATATAGATGACAAGGTAGTATA  
 TCAAAACATTGGTTCACAAAGATGGTGCATGGTCAGTTGGTAAAACTATTAAGCTACATTAGTTACAGATATCACAACTATAATAGTTA  
 AACATAGAAATATGTGTAATTTGTGATGGAAATTAATTCAAAAACACAAAAATACGTGATGAAGGACAAAATGATATAGAAAAAAGTATC  
 AAACCTTAATAAATGATTTAATGATAGTTTAAAAGTTATAGGAAAAATATAAAGAAATAAAAACATTAATAAATATAAGATATGTT  
 TACAAATTACTATCAGACAATCTCCTTATCTAATAGAAGAGTCAATTAACATAATTGAGTATCTTTAAATTGAAATGTTAGGAAGTGATTT  
 AAATATGAAAACCTAAATTATAAAAAATCAATATTAATTTATTTTTAAAAAATAGAAAGGAGTGTATAAGATTTATTTTCAAAGTTTAAA  
 AACAAGAAAATCAATTTAAATTTTTCAGAAGGAATAAATGTGGTTATAGAAGTGGATTTATTATCAAAAATAATAACTAGGAGGTTTTT

&gt;DSM-28196

ATAAAAATACGTTAAATATATCCTCTTATACTTAAATATATAAAAAATAACAAAATGATACACTACATAAAAGTGTCTATCTAATATGAA  
 GATTTACCAATAAAAAGGTGAACATGATGAATGCACAGTAGTTCACCTTTTTATATTTCTAATGGTAACAAAATATTTTTTATATAAAA  
 CCTAGGAGGCGTTATGAATATGACAATATCTTTTTTATCAGAGCATATATTTATAAAGTTAGTAATTTTAACTATATCATTGATACATT  
 ATTAGGATGTTTAAAGTGAATAAAAAGTCGTAATTTAATTTCTAGTTTTGGAAATAGATGGAGGAATCAGAAAAGTAGCAATGATAGCATG  
 TATATTTTTTTTTATCAGTAGTTGACATTCCTTACAAAGTTTAACTTTTTATTATGTTACCACAAGATTGTATCAATTTTTTAAAGACTAAA  
 ACATCTTGGAAATATCTGAATTTTTCTCTATTTTTATTTATTTTATATGAAAGTGTAAAGCATAATTAATAAATATGTGCTTATGTGGATTACC  
 AGTACCTAAGAGATTAAGGAAAAAATAGCAGTTTTTACTAGATGCAATGACAGATGAAATGAATGCTAAGGATGAAAAGTAAGTAATGGT  
 AGATATAATAAAAAATATTAACAAATAAAAAGTGTATCCAAATAAGAATAGCTGAAAGTTATCATAATTCATGAAACTGATAATGAAAAC  
 GAGGGAGCAGATGCCAAGAGACACACAAGTATTAATAACATATAATTTTGAAGCAAGTGTTCATTACTATATGGATGACAAGGTAGTATA  
 TCAAAACATTGGTTCACAAAGATGGTGCATGGTCAGTTGGTAAAACTATTAAGCTACATTAGTTACAGATATCACAACTATAATAGTTA  
 AACATAGAAATATGTGTAATTTGTGATGGAAATTAATTCAAAAACACAAAAATACGTGATGAAGGACAAAATGATAGAGAAAAAAGTATC  
 AAACCTTAATAAATGATTTAATGATAGTTTAAAAGTTATAGGAAAAATATAAAGAAATAAAAACATTAATAAATATAAGATATGTT  
 TACAAATTACTATCAGACAATCTCCTTATCTAATAGAAGAGTCAATTAACATAATTGAGTATCTTTAAATTGAAATGTTAGGAAGTGATTT  
 AAATATGAAAACCTAAATTATAAAAAATCAATATTAATTTATCTTTAAAAAATAGAAAGGAGTGTATAAGATTTATTTTCAAAGTTTAAA  
 AACAAGAAAATCAATTTAAATTTTTCAGAAGGAATAAATGTGGTTATAGAAGTGGATTTATTATCAAAAATAATAACTAGGAGGTTTTT

>DSM-28197

ATAAAAATATGTTAAATATATCCTCTTATACTTAAATATATAAAAAATAACAAAATGATACACTACATAAAAGTGTCTATCTAATATGAA  
GATTTACCAATAAAAAGGTGGACTATGATGAATGCACAGTAGTTCACCTTTTTATATTTCTAATGGTAACAAAATATTTTTTATATAAAA  
CCTAGGAGGCGTTATGAATATGACAATATCTTTTTTATCAGAGCATATATTTATAAAGTTAGTAATTTTAACTATATCATTTTGATACATT  
ATTAGGATGTTTAAAGTGAATAAAAAGTCGTAAATTTAATTCAGTTTTGGAAATAGATGGAGGAATCAGAAAAGTAGCAATGATAGCATG  
TATATTTTTTTTTATCAGTAGTTGACATTCTTACAAAGTTTAACTTTTTATTTATGTTACCACAAGATTGTATCAATTTTTTAAAGACTAAA  
ACATCTTGGAAATATCTGAATTTTTCTCTATTTTATTTATTTTATATGAAAGTGAAGTATATAAAAAATATGTGCTTATGTGGATTACC  
AGTACCTAAGAGATTAAGGAAAAAATAGCAATTTTACTAGATGCAATGACAGATGAAATGAATGCTAAGGATGAAAAGTAAGTAATGGT  
AGATATAATAAAGATATTAACAAAATAAAAAGTGTATCCAAAATAAGAATAGCTGAAAGTTATCATAATTCATGAACTAATAATGAAAAC  
GAGGGAGCAGATGCCAAGAGACACACAAGTATTAATACATATAATTTTCGAAGCAAGTGTTCACTACTATATAGATGACAAGGTAGTATA  
TCAAAACATTGGTTCACAAAGATGGTGCATGGTCAGTTGGTAAAACTATTAAGCTACATTAGTTACAGATATCACAACTATAAATAGTTA  
AACATAGAAATATGTGTAATTTGTGATGGAATTTATTCAAAAACACAAAAATACGTGATGAAGGACAAAATGATATAGAAAAAAGTATC  
AAACCTTAATAAATGATTTAATTTGATAGTTTAAAAGTTATAGGAAAAATATAAAGAAATAAAAACATTAAAAAAATATAAGATATGTT  
TACAAATTACTATCAGACAATCTCCTTATCTAATAGAAGAGTCAATTAACATAATTGAGTATCTTTAAATTTGAAATGTTAGGAAGTGATTT  
AAATATGAAAACCTAAATTTAAAAAATCAATATTAATTTATTTTTAAAAAATAGAAAGGAGTGATAAGATTTATTTTCAAAGTTTAAA  
ACAAGAAAATCAATTTAAATTTTCAGAAGGAATAAATGTGGTTATAGAAGTGATTTATTATCAAAAATAATAACTAGGAGGTTTTT

>DSM-27638

ATAAAAATACGTTAAATATATCCTCTTATACTTAAATATATAAAAAATAACAAAATGATACACTACATAAAAGTGTCTATCTAATATGAA  
GATTTACCAATAAAAAGGTGAACTATGATGAATGCACAGTAGTTCACCTTTTTATATTTCTAATGGTAACAAAATATTTTTTATATAAAA  
CCTAGGAGGCGTTATGAATATGACAATATCTTTTTTATCAGAGCATATATTTATAAAGTTAGTAATTTTAACTATATCATTTTGATACATT  
ATTAGGATGTTTAAAGTGAATAAAAAGTCGTAAATTTAATTCAGTTTTGGAAATAGATGGAGGAATCAGAAAAGTAGCAATGATAGCATG  
TATATTTTTTTTTATCAGTAGTTGACATTCTTACAAAGTTTAACTTTTTATTTATGTTACCACAAGATTGTATCAATTTTTTAAAGACTAAA  
ACATCTTGGAAATATCTGAATTTTTCTCTATTTTATTTATTTTATATGAAAGTGAAGCATAATAAAAAATATGTGCTTATGTGGATTACC  
AGTACCTAAGAGATTAAGGAAAAAATAGCAGTTTTACTAGATGCAATGACAGATGAAATGAATGCTAAGGATGAAAAGTAAGTAATGGT  
AGATATAATAAATAAATTAACAAAATAAAAAGTGTATCCAAAATAAGAATAGCTGAAAGTTATCATAATTCATGAACTGATAATGAAAAC  
GAGGGAGCAGATGCCAAGAGACACACAAGTATTAATACATATAATTTTCGAAGCAAGTGTTCACTACTATATGGATGACAAGGTAGTATA  
TCAAAACATTGGTTCACAAAGATGGTGCATGGTCAGTTGGTAAAACTATTAAGCTACATTAGTTACAGATATCACAACTATAAATAGTTA  
AACATAGAAATATGTGTAATTTGTGATGGAATTTATTCAAAAACACAAAAATACGTGATGAAGGACAAAATGATAGAGAAAAAAGTATC  
AAACCTTAATAAATGATTTAATTTGATAGTTTAAAAGTTATAGGAAAAATATAAAGAAATAAAAACATTAAAAAAATATAAGATATGTT  
TACAAATTACTATCAGACAATCTCCTTATCTAATAGAAGAGTCAATTAACATAATTGAGTATCTTTAAATTTGAAATGTTAGGAAGTGATTT  
AAATATGAAAACCTAAATTTAAAAAATCAATATTAATTTATCTTTAAAAAATAGAAAGGAGTGATAAGATTTATTTTCAAAGTTTAAA

>DSM-1296T

ATAAAAATATGTTAAATATATCCTCTTATACTTAAATATATAAAAAATAACAAAATGATACACTACATAAAAGTGTCTATCTAATATGAA  
GATTTACCAATAAAAAGGTGGACTATGATGAATGCACAGTAGTTCACCTTTTTATATTTCTAATGGTAACAAAATATTTTTTATATAAAA  
CCTAGGAGGCGTTATGAATATGACAATATCTTTTTTATCAGAGCATATATTTATAAAGTTAGTAATTTTAACTATATCATTTTGATACATT  
ATTAGGATGTTTAAAGTGAATAAAAAGTCGTAAATTTAATTCAGTTTTGGAAATAGATGGAGGAATCAGAAAAGTAGCAATGATAGCATG  
TATATTTTTTTTTATCAGTAGTTGACATTCTTACAAAGTTTAACTTTTTATTTATGTTACCACAAGATTGTATCAATTTTTTAAAGACTAAA  
ACATCTTGGAAATATCTGAATTTTTCTCTATTTTATTTATTTTATATGAAAGTGAAGTATATAAAAAATATGTGCTTATGTGGATTACC  
AGTACCTAAGAGATTAAGGAAAAAATAGCAATTTTACTAGATGCAATGACAGATGAAATGAATGCTAAGGATGAAAAGTAAGTAATGGT  
AGATATAATAAAGATATTAACAAAATAAAAAGTGTATCCAAAATAAGAATAGCTGAAAGTTATCATAATTCATGAACTAATAATGAAAAC  
GAGGGAGCAGATGCCAAGAGACACACAAGTATTAATACATATAATTTTCGAAGCAAGTGTTCACTACTATATAGATGACAAGGTAGTATA  
TCAAAACATTGGTTCACAAAGATGGTGCATGGTCAGTTGGTAAAACTATTAAGCTACATTAGTTACAGATATCACAACTATAAATAGTTA  
AACATAGAAATATGTGTAATTTGTGATGGAATTTATTCAAAAACACAAAAATACGTGATGAAGGACAAAATGATATAGAAAAAAGTATC  
AAACCTTAATAAATGATTTAATTTGATAGTTTAAAAGTTATAGGAAAAATATAAAGAAATAAAAACATTAAAAAAATATAAGATATGTT  
TACAAATTACTATCAGACAATCTCCTTATCTAATAGAAGAGTCAATTAACATAATTGAGTATCTTTAAATTTGAAATGTTAGGAAGTGATTT  
AAATATGAAAACCTAAATTTAAAAAATCAATATTAATTTATTTTTAAAAAATAGAAAGGAGTGATAAGATTTATTTTCAAAGTTTAAA  
ACAAGAAAATCAATTTAAATTTTCAGAAGGAATAAATGTGGTTATAGAAGTGATTTATTATCAAAAATAATAACTAGGAGGTTTTT

&gt;DSM-27639

ATAAAAATATGTTAAATATATCCTCTTATACTTAAATATATAAAAAATAACAAAATGATACACTACATAAAAGTGTTCATCTAATATGAA  
 GATTTACCAATAAAAAGGTGGACTATGATGAATGCACAGTAGTTCACCTTTTTATATTTCTAATGGTAACAAAATATTTTTTTATATAAAA  
 CCTAGGAGGCGTTATGAATATGACAATATCTTTTTTATCAGAGCATATATTTATAAAGTTAGTAATTTTAACTATATCATTGGATACATT  
 ATTAGGATGTTTAAAGTGAATAAAAAGTCGTAATTTAATTTCTAGTTTTGGAAATAGATGGAGGAATCAGAAAAGTAGCAATGATAGCATG  
 TATATTTTTTTTTATCAGTAGTTGACATTCCTTACAAAGTTTAACTTTTTATTATGTTACCACAAGATTGTATCAATTTTTTAAAGACTAAA  
 ACATCTTGGAAATATCTGAATTTTTCTCTATTTTTATTTATTTTATATGAAAGTGTAAAGTATATTAATAAATATGTGCTTATGTGGATTACC  
 AGTACCTAAGAGATTAAGGAAAAAATAGCAATTTTACTAGATGCAATGACAGATGAAATGAATGCTAAGGATGAAAAGTAAGTAATGGT  
 AGATATAATAAAGATATTAACAAATAAAAAGTGTATCCAAATAAGAATAGCTGAAAGTTATCATAATTCATAAATAAATAAGAAAAC  
 GAGGGAGCAGATGCCAAGAGACACACAAGTATTAATAACATATAATTTTGAAGCAAGTGTTCATTACTATATAGATGACAAGGTAGTATA  
 TCAAAACATTGGTTCACAAAGATGGTGCATGGTCAGTTGGTAAAAATCTATTAAGCTACATTAGTTACAGATATCACAAACTATAATAGTTA  
 AACATAGAAATATGTGTAATTTGTGATGGAAATTAATTCAAAAACACAAAAATACGTGATGAAGGACAAAATGATATAGAAAATAAGTATC  
 AAACCTTAATAAATGATTTAATGATAGTTTTAAAAGTTATAGGAAAAATATAAAGAAAATAAAAACATTAATAAATAAATAGATATGTT  
 TACAAATTACTATCAGACAATCTCCTTATCTAATAGAAAGTCAATTAACATAATTGAGTATCTTTAAATTGAAATGTTAGGAAGTGATTT  
 AAATATGAAAACCTAAATTATAAAAAATCAATATTAATTTATTTTTAAAAAATAGAAAGGAGTGTATAAGATTTATTTTTCAAAGTTTAAA  
 AACAAGAAAATCAATTTAAATTTTTCAGAAGGAATAAATGTGGTTATAGAAGTGGATTTATTATCAAAAATAATAACTAGGAGGTTTTT

&gt;DSM-29675

ATAAAAATATGTTAAATATATCCTCTTATACTTAAATATATAAAAAATAACAAAATGATACACTACATAAAAGTGTTCATCTAATATGAA  
 GATTTACCAATAAAAAGGTGGACTATGATGAATGCACAGTAGTTCACCTTTTTATATTTCTAATGGTAACAAAATATTTTTTTATATAAAA  
 CCTAGGAGGCGTTATGAATATGACAATATCTTTTTTATCAGAGCATATATTTATAAAGTTAGTAATTTTAACTATATCATTGGATACATT  
 ATTAGGATGTTTAAAGTGAATAAAAAGTCGTAATTTAATTTCTAGTTTTGGAAATAGATGGAGGAATCAGAAAAGTAGCAATGATAGCATG  
 TATATTTTTTTTTATCAGTAGTTGACATTCCTTACAAAGTTTAACTTTTTATTATGTTACCACAAGATTGTATCAATTTTTTAAAGACTAAA  
 ACATCTTGGAAATATCTGAATTTTTCTCTATTTTTATTTATTTTATATGAAAGTGTAAAGTATATTAATAAATATGTGCTTATGTGGATTACC  
 AGTACCTAAGAGATTAAGGAAAAAATAGCAATTTTACTAGATGCAATGACAGATGAAATGAATGCTAAGGATGAAAAGTAAGTAATGGT  
 AGATATAATAAAGATATTAACAAATAAAAAGTGTATCCAAATAAGAATAGCTGAAAGTTATCATAATTCATAAATAAATAAGAAAAC  
 GAGGGAGCAGATGCCAAGAGACACACAAGTATTAATAACATATAATTTTGAAGCAAGTGTTCATTACTATATAGATGACAAGGTAGTATA  
 TCAAAACATTGGTTCACAAAGATGGTGCATGGTCAGTTGGTAAAAATCTATTAAGCTACATTAGTTACAGATATCACAAACTATAATAGTTA  
 AACATAGAAATATGTGTAATTTGTGATGGAAATTAATTCAAAAACACAAAAATACGTGATGAAGGACAAAATGATATAGAAAATAAGTATC  
 AAACCTTAATAAATGATTTAATGATAGTTTTAAAAGTTATAGGAAAAATATAAAGAAAATAAAAACATTAATAAATAAATAGATATGTT  
 TACAAATTACTATCAGACAATCTCCTTATCTAATAGAAAGTCAATTAACATAATTGAGTATCTTTAAATTGAAATGTTAGGAAGTGATTT  
 AAATATGAAAACCTAAATTATAAAAAATCAATATTAATTTATTTTTAAAAAATAGAAAGGAGTGTATAAGATTTATTTTTCAAAGTTTAAA  
 AACAAGAAAATCAATTTAAATTTTTCAGAAGGAATAAATGTGGTTATAGAAGTGGATTTATTATCAAAAATAATAACTAGGAGGTTTTT

&gt;DSM-29676

ATAAAAATATGTTAAATATATCCTCTTATACTTAAATATATAAAAAATAACAAAATGATACACTACATAAAAGTGTTCATCTAATATGAA  
 GATTTACCAATAAAAAGGTGGACTATGATGAATGCACAGTAGTTCACCTTTTTATATTTCTAATGGTAACAAAATATTTTTTTATATAAAA  
 CCTAGGAGGCGTTATGAATATGACAATATCTTTTTTATCAGAGCATATATTTATAAAGTTAGTAATTTTAACTATATCATTGGATACATT  
 ATTAGGATGTTTAAAGTGAATAAAAAGTCGTAATTTAATTTCTAGTTTTGGAAATAGATGGAGGAATCAGAAAAGTAGCAATGATAGCATG  
 TATATTTTTTTTTATCAGTAGTTGACATTCCTTACAAAGTTTAACTTTTTATTATGTTACCACAAGATTGTATCAATTTTTTAAAGACTAAA  
 ACATCTTGGAAATATCTGAATTTTTCTCTATTTTTATTTATTTTATATGAAAGTGTAAAGTATATTAATAAATATGTGCTTATGTGGATTACC  
 AGTACCTAAGAGATTAAGGAAAAAATAGCAATTTTACTAGATGCAATGACAGATGAAATGAATGCTAAGGATGAAAAGTAAGTAATGGT  
 AGATATAATAAAGATATTAACAAATAAAAAGTGTATCCAAATAAGAATAGCTGAAAGTTATCATAATTCATAAATAAATAAGAAAAC  
 GAGGGAGCAGATGCCAAGAGACACACAAGTATTAATAACATATAATTTTGAAGCAAGTGTTCATTACTATATAGATGACAAGGTAGTATA  
 TCAAAACATTGGTTCACAAAGATGGTGCATGGTCAGTTGGTAAAAATCTATTAAGCTACATTAGTTACAGATATCACAAACTATAATAGTTA  
 AACATAGAAATATGTGTAATTTGTGATGGAAATTAATTCAAAAACACAAAAATACGTGATGAAGGACAAAATGATATAGAAAATAAGTATC  
 AAACCTTAATAAATGATTTAATGATAGTTTTAAAAGTTATAGGAAAAATATAAAGAAAATAAAAACATTAATAAATAAATAGATATGTT  
 TACAAATTACTATCAGACAATCTCCTTATCTAATAGAAAGTCAATTAACATAATTGAGTATCTTTAAATTGAAATGTTAGGAAGTGATTT  
 AAATATGAAAACCTAAATTATAAAAAATCAATATTAATTTATTTTTAAAAAATAGAAAGGAGTGTATAAGATTTATTTTTCAAAGTTTAAA  
 AACAAGAAAATCAATTTAAATTTTTCAGAAGGAATAAATGTGGTTATAGAAGTGGATTTATTATCAAAAATAATAACTAGGAGGTTTTT

>DSM-29677

ATAAAAATATGTTAAATATATCCTCTTATACTTAAATATATAAAAAATAAACAAAATGATACACTACATAAAAGTGTCTATCTAATATGAA  
GATTTACCAATAAAAAAGGTGGACTATGATGAATGCACAGTAGTTCACCTTTTTATATTTCTAATGGTAACAAAATATTTTTTATATAAAA  
CCTAGGAGGCGTTATGAATATGACAATATCTTTTTTATCAGAGCATATATTTATAAAGTTAGTAATTTTAACTATATCATTTTGATACATT  
ATTAGGATGTTTAAAGTGAATAAAAAAGTCGTAAATTTAATTCAGTTTTGGAAATAGATGGAGGAATCAGAAAAGTAGCAATGATAGCATG  
TATATTTTTTTTTATCAGTAGTTGACATTCTTACAAAGTTTAACTTTTTATTTATGTTACCACAAGATTGTATCAATTTTTTAAAGACTAAA  
ACATCTTGGAAATATCTGAATTTTTCTCTATTTTATTTATTTTATATGAAAGTGAAGTATATAAAAAATATGTGCTTATGTGGATTACC  
AGTACCTAAGAGATTAAGGAAAAAATAGCAATTTTACTAGATGCAATGACAGATGAAATGAATGCTAAGGATGAAAAGTAAAGTAATGGT  
AGATATAATAAAGATATTAACAAAATAAAAAGTGTATCCAAAATAAGAATAGCTGAAAGTTATCATAATTCATGAACTAATAATGAAAAC  
GAGGGAGCAGATGCCAAGAGACACACAAGTATTAATACATATAATTTTTCGAAGCAAGTGTTCATTACTATATAGATGACAAGGTAGTATA  
TCAAAACATTGGTTCACAAAGATGGTGCATGGTCAGTTGGTAAAACTATTAAGCTACATTAGTTACAGATATCACAAACTATAAATAGTTA  
AACATAGAAATATGTGTAATTTGTGATGGAATTTATTCAAAAACACAAAAATACGTGATGAAGGACAAAATGATATAGAAAATAAGTATC  
AAACCTTAATAAATGATTTAATTTGATAGTTTAAAAGTTATAGGAAAAATATATAAAGAAATAAAAACATTAAAAAAATATAAGATATGTT  
TACAAATTACTATCAGACAATCTCCTTATCTAATAGAAGAGTCAATTAACATAATTGAGTATCTTTAAATTGAAATGTTAGGAAGTGATTT  
AAATATGAAAACCTAAATTTAAAAAATCAATATTAATTTATTTTTAAAAAATAGAAAAGGAGTGATAAGATTTATTTTCAAAGTTTAAA  
ACAAGAAAATCAATTTAAATTTTTCAGAAGGAATAAATGTGGTTATAGAAGTGGATTTATTATCAAAAATAATAACTAGGAGGTTTTT

>DSM-27640

ATAAAAATACGTTAAATATATCCTCTTATACTTAAATATATAAAAAATAAACAAAATGATACACTACATAAAAGTGTCTATCTAATATGAA  
GATTTACCAATAAAAAAGGTGAACTATGATGAATGCACAGTAGTTCACCTTTTTATATTTCTAATGGTAACAAAATATTTTTTATATAAAA  
CCTAGGAGGCGTTATGAATATGACAATATCTTTTTTATCAGAGCATATATTTATAAAGTTAGTAATTTTAACTATATCATTTTGATACATT  
ATTAGGATGTTTAAAGTGAATAAAAAAGTCGTAAATTTAATTCAGTTTTGGAAATAGATGGAGGAATCAGAAAAGTAGCAATGATAGCATG  
TATATTTTTTTTTATCAGTAGTTGACATTCTTACAAAGTTTAACTTTTTATTTATGTTACCACAAGATTGTATCAATTTTTTAAAGACTAAA  
ACATCTTGGAAATATCTGAATTTTTCTCTATTTTATTTATTTTATATGAAAGTGAAGTATTAATAAATATGTGCTTATGTGGATTACC  
AGTACCTAAGAGATTAAGGAAAAAATAGCAGTTTTACTAGATGCAATGACAGATGAAATGAATGCTAAGGATGAAAAGTAAAGTAATGGT  
AGATATAATAAATAATTAACAAAATAAAAAGTGTATCCAAAATAAGAATAGCTGAAAGTTATCATAATTCATGAACTGATAATGAAAAC  
GAGGGAGCAGATGCCAAGAGACACACAAGTATTAATACATATAATTTTTCGAAGCAAGTGTTCATTACTATATGGATGACAAGGTAGTATA  
TCAAAACATTGGTTCACAAAGATGGTGCATGGTCAGTTGGTAAAACTATTAAGCTACATTAGTTACAGATATCACAAACTATAAATAGTTA  
AACATAGAAATATGTGTAATTTGTGATGGAATTTATTCAAAAACACAAAAATACGTGATGAAGGACAAAATGATAGAGAAAATAAGTATC  
AAACCTTAATAAATGATTTAATTTGATAGTTTAAAAGTTATAGGAAAAATATATAAAGAAATAAAAACATTAAAAAAATATAAGATATGTT  
TACAAATTACTATCAGACAATCTCCTTATCTAATAGAAGAGTCAATTAACATAATTGAGTATCTTTAAATTGAAATGTTAGGAAGTGATTT  
AAATATGAAAACCTAAATTTAAAAAATCAATATTAATTTATCTTTAAAAAATAGAAAAGGAGTGATAAGATTTATTTTCAAAGTTTAAA  
ACAAGAAAATCAATTTAAATTTTTCAGAAGGAATAAATGTGGTTATAGAAGTGGATTTATTATCAAAAATAATAACTAGGAGGTTTTT

>DSM-29678

ATAAAAATATGTTAAATATATCCTCTTATACTTAAATATATAAAAAATAAACAAAATGATACACTACATAAAAGTGTCTATCTAATATGAA  
GATTTACCAATAAAAAAGGTGGACTATGATGAATGCACAGTAGTTCACCTTTTTATATTTCTAATGGTAACAAAATATTTTTTATATAAAA  
CCTAGGAGGCGTTATGAATATGACAATATCTTTTTTATCAGAGCATATATTTATAAAGTTAGTAATTTTAACTATATCATTTTGATACATT  
ATTAGGATGTTTAAAGTGAATAAAAAAGTCGTAAATTTAATTCAGTTTTGGAAATAGATGGAGGAATCAGAAAAGTAGCAATGATAGCATG  
TATATTTTTTTTTATCAGTAGTTGACATTCTTACAAAGTTTAACTTTTTATTTATGTTACCACAAGATTGTATCAATTTTTTAAAGACTAAA  
ACATCTTGGAAATATCTGAATTTTTCTCTATTTTATTTATTTTATATGAAAGTGAAGTATATAAAAAATATGTGCTTATGTGGATTACC  
AGTACCTAAGAGATTAAGGAAAAAATAGCAATTTTACTAGATGCAATGACAGATGAAATGAATGCTAAGGATGAAAAGTAAAGTAATGGT  
AGATATAATAAAGATATTAACAAAATAAAAAGTGTATCCAAAATAAGAATAGCTGAAAGTTATCATAATTCATGAACTAATAATGAAAAC  
GAGGGAGCAGATGCCAAGAGACACACAAGTATTAATACATATAATTTTTCGAAGCAAGTGTTCATTACTATATAGATGACAAGGTAGTATA  
TCAAAACATTGGTTCACAAAGATGGTGCATGGTCAGTTGGTAAAACTATTAAGCTACATTAGTTACAGATATCACAAACTATAAATAGTTA  
AACATAGAAATATGTGTAATTTGTGATGGAATTTATTCAAAAACACAAAAATACGTGATGAAGGACAAAATGATATAGAAAATAAGTATC  
AAACCTTAATAAATGATTTAATTTGATAGTTTAAAAGTTATAGGAAAAATATATAAAGAAATAAAAACATTAAAAAAATATAAGATATGTT  
TACAAATTACTATCAGACAATCTCCTTATCTAATAGAAGAGTCAATTAACATAATTGAGTATCTTTAAATTGAAATGTTAGGAAGTGATTT  
AAATATGAAAACCTAAATTTAAAAAATCAATATTAATTTATTTTTAAAAAATAGAAAAGGAGTGATAAGATTTATTTTCAAAGTTTAAA  
ACAAGAAAATCAATTTAAATTTTTCAGAAGGAATAAATGTGGTTATAGAAGTGGATTTATTATCAAAAATAATAACTAGGAGGTTTTT

&gt;DSM-29679

ATAAAAATATGTTAAATATATCCTCTTATACTTAAATATATAAAAAATAAACAAAATGATACACTACATAAAAGTGTTCATCTAATATGAA  
 GATTTACCAATAAAAAGGTGGACTATGATGAATGCACAGTAGTTCACCTTTTTATATTTCTAATGGTAACAAAATATTTTTTTATATAAAA  
 CCTAGGAGGCGTTATGAATATGACAATATCTTTTTTATCAGAGCATATATTTATAAAGTTAGTAATTTTAACTATATCATTTTGATACATT  
 ATTAGGATGTTTAAAGTGAATAAAAAGTCGTAATTTAATTTCTAGTTTTGGAAATAGATGGAGGAATCAGAAAAGTAGCAATGATAGCATG  
 TATATTTTTTTTTATCAGTAGTTGACATTCCTTACAAAGTTTAACTTTTTATTATGTTACCACAAGATTGTATCAATTTTTTAAAGACTAAA  
 ACATCTTGGAAATATCTGAATTTTTCTCTATTTTTATTTATTTTATATGAAAGTGTAAAGTATATTAATAAATATGTGCTTATGTGGATTACC  
 AGTACCTAAGAGATTAAGGAAAAAATAGCAATTTTACTAGATGCAATGACAGATGAAATGAATGCTAAGGATGAAAAGTAAGTAATGGT  
 AGATATAATAAAGATATTAACAAATAAAAAGTGTATCCAAATAAGAATAGCTGAAAGTTATCATAATTCATGAAACTAATAATGAAAAC  
 GAGGGAGCAGATGCCAAGAGACACACAAGTATTAATAACATATAATTTTGAAGCAAGTGTTCATTACTATATAGATGACAAGGTAGTATA  
 TCAAAACATTGGTTCACAAAGATGGTGCATGGTCAGTTGGTAAAACTATTAAGCTACATTAGTTACAGATATCACAAACTATAATAGTTA  
 AACATAGAAAATATGTGTAATTTGTGATGGAAATTAATTCAAAAACACAAAAATACGTGATGAAGGACAAAATGATATAGAAAATAAGTATC  
 AAACCTTAATAAATGATTTAATGATAGTTTTAAAAGTTATAGGAAAAATATAAAGAAATAAAAACATTAATAAATATAAGATATGTT  
 TACAAATTACTATCAGACAATCTCCTTATCTAATAGAAGAGTCAATTAACATAATTGAGTATCTTTAAATTGAAATGTTAGGAAGTGATTT  
 AAATATGAAAACCTAAATTATAAAAAATCAATATTAATTTATTTTTAAAAAATAGAAAGGAGTGTATAAGATTTATTTTCAAAGTTTAAA  
 AACAAGAAAATCAATTTAAATTTTTCAGAAGGAATAAATGTGGTTATAGAAGTGGATTTATTATCAAAAATAATAACTAGGAGGTTTTT

&gt;DSM-29680

ATAAAAATACGTTAAATATATCCTCTTATACTTAAATATATAAAAAATAAACAAAATGATACACTACATAAAAGTGTTCATCTAATATGAA  
 GATTTACCAATAAAAAGGTGAACTATGATGAATGCACAGTAGTTCACCTTTTTATATTTCTAATGGTAACAAAATATTTTTTTATATAAAA  
 CCTAGGAGGCGTTATGAATATGACAATATCTTTTTTATCAGAGCATATATTTATAAAGTTAGTAATTTTAACTATATCATTTTGATACATT  
 ATTAGGATGTTTAAAGTGAATAAAAAGTCGTAATTTAATTTCTAGTTTTGGAAATAGATGGAGGAATCAGAAAAGTAGCAATGATAGCATG  
 TATATTTTTTTTTATCAGTAGTTGACATTCCTTACAAAGTTTAACTTTTTATTATGTTACCACAAGATTGTATCAATTTTTTAAAGACTAAA  
 ACATCTTGGAAATATCTGAATTTTTCTCTATTTTTATTTATTTTATATGAAAGTGTAAAGCATATTAATAAATATGTGCTTATGTGGATTACC  
 AGTACCTAAGAGATTAAGGAAAAAATAGCAGTTTTTACTAGATGCAATGACAGATGAAATGAATGCTAAGGATGAAAAGTAAGTAATGGT  
 AGATATAATAAAGATATTAACAAATAAAAAGTGTATCCAAATAAGAATAGCTGAAAGTTATCATAATTCATGAAACTGATAATGAAAAC  
 GAGGGAGCAGATGCCAAGAGACACACAAGTATTAATAACATATAATTTTGAAGCAAGTGTTCATTACTATATGGATGACAAGGTAGTATA  
 TCAAAACATTGGTTCACAAAGATGGTGCATGGTCAGTTGGTAAAACTATTAAGCTACATTAGTTACAGATATCACAAACTATAATAGTTA  
 AACATAGAAAATATGTGTAATTTGTGATGGAAATTAATTCAAAAACACAAAAATACGTGATGAAGGACAAAATGATATAGAAAATAAGTATC  
 AAACCTTAATAAATGATTTAATGATAGTTTTAAAAGTTATAGGAAAAATATAAAGAAATAAAAACATTAATAAATATAAGATATGTT  
 TACAAATTACTATCAGACAATCTCCTTATCTAATAGAAGAGTCAATTAACATAATTGAGTATCTTTAAATTGAAATGTTAGGAAGTGATTT  
 AAATATGAAAACCTAAATTATAAAAAATCAATATTAATTTATCTTTAAAAAATAGAAAGGAGTGTATAAGATTTATTTTCAAAGTTTAAA  
 AACAAGAAAATCAATTTAAATTTTTCAGAAGGAATAAATGTGGTTATAGAAGTGGATTTATTATCAAAAATAATAACTAGGAGGTTTTT

&gt;DSM-29683

ATAAAAATATGTTAAATATATCCTCTTATACTTAAATATATAAAAAATAAACAAAATGATACACTACATAAAAGTGTTCATCTAATATGAA  
 GATTTACCAATAAAAAGGTGGACTATGATGAATGCACAGTAGTTCACCTTTTTATATTTCTAATGGTAACAAAATATTTTTTTATATAAAA  
 CCTAGGAGGCGTTATGAATATGACAATATCTTTTTTATCAGAGCATATATTTATAAAGTTAGTAATTTTAACTATATCATTTTGATACATT  
 ATTAGGATGTTTAAAGTGAATAAAAAGTCGTAATTTAATTTCTAGTTTTGGAAATAGATGGAGGAATCAGAAAAGTAGCAATGATAGCATG  
 TATATTTTTTTTTATCAGTAGTTGACATTCCTTACAAAGTTTAACTTTTTATTATGTTACCACAAGATTGTATCAATTTTTTAAAGACTAAA  
 ACATCTTGGAAATATCTGAATTTTTCTCTATTTTTATTTATTTTATATGAAAGTGTAAAGTATATTAATAAATATGTGCTTATGTGGATTACC  
 AGTACCTAAGAGATTAAGGAAAAAATAGCAATTTTACTAGATGCAATGACAGATGAAATGAATGCTAAGGATGAAAAGTAAGTAATGGT  
 AGATATAATAAAGATATTAACAAATAAAAAGTGTATCCAAATAAGAATAGCTGAAAGTTATCATAATTCATGAAACTAATAATGAAAAC  
 GAGGGAGCAGATGCCAAGAGACACACAAGTATTAATAACATATAATTTTGAAGCAAGTGTTCATTACTATATAGATGACAAGGTAGTATA  
 TCAAAACATTGGTTCACAAAGATGGTGCATGGTCAGTTGGTAAAACTATTAAGCTACATTAGTTACAGATATCACAAACTATAATAGTTA  
 AACATAGAAAATATGTGTAATTTGTGATGGAAATTAATTCAAAAACACAAAAATACGTGATGAAGGACAAAATGATATAGAAAATAAGTATC  
 AAACCTTAATAAATGATTTAATGATAGTTTTAAAAGTTATAGGAAAAATATAAAGAAATAAAAACATTAATAAATATAAGATATGTT  
 TACAAATTACTATCAGACAATCTCCTTATCTAATAGAAGAGTCAATTAACATAATTGAGTATCTTTAAATTGAAATGTTAGGAAGTGATTT  
 AAATATGAAAACCTAAATTATAAAAAATCAATATTAATTTATCTTTAAAAAATAGAAAGGAGTGTATAAGATTTATTTTCAAAGTTTAAA  
 AACAAGAAAATCAATTTAAATTTTTCAGAAGGAATAAATGTGGTTATAGAAGTGGATTTATTATCAAAAATAATAACTAGGAGGTTTTT



>DSM-29684

ATAAAAATATGTTAAATATATCCTCTTATACTTAAATATATAAAAAATAAACAAAATGATACACTACATAAAAGTGTCTATCTAATATGAA  
GATTTACCAATAAAAAGGTGGACTATGATGAATGCACAGTAGTTCACCTTTTTATATTTCTAATGGTAACAAAATATTTTTTATATAAAA  
CCTAGGAGGCGTTATGAATATGACAATATCTTTTTTATCAGAGCATATATTTATAAAGTTAGTAATTTTAACTATATCATTTGATACATT  
ATTAGGATGTTTAAAGTGAATAAAAAGTCGTAAATTTAATTCAGTTTTGGAAATAGATGGAGGAATCAGAAAAGTAGCAATGATAGCATG  
TATATTTTTTTTTATCAGTAGTTGACATTCTTACAAAGTTTAACTTTTTATTTATGTTACCACAAGATTGTATCAATTTTTTAAAGACTAAA  
ACATCTTGGAAATATCTGAATTTTTCTCTATTTTATTTATTTTATATGAAAGTGAAGTATATAAAAAATATGTGCTTATGTGGATTACC  
AGTACCTAAGAGATTAAGGAAAAAATAGCAATTTTACTAGATGCAATGACAGATGAAATGAATGCTAAGGATGAAAAGTAAGTAATGGT  
AGATATAATAAAGATATTAACAAAATAAAAAGTGTATCCAAAATAAGAATAGCTGAAAGTTATCATAATTCATGAACTAATAATGAAAAC  
GAGGGAGCAGATGCCAAGAGACACACAAGTATTAATACATATAATTTTTCGAAGCAAGTGTTCATTACTATATAGATGACAAGGTAGTATA  
TCAAAACATTGGTTCACAAAGATGGTGCATGGTCAGTTGGTAAAACTATTAAGCTACATTAGTTACAGATATCACAACTATAAATAGTTA  
AACATAGAAATATGTGTAATTTGTGATGGAATTTATTCAAAAACACAAAAATACGTGATGAAGGACAAAATGATATAGAAAATAAGTATC  
AAACCTTAATAAATGATTTAATTTGATAGTTTAAAAGTTATAGGAAAAATATAAAGAAATAAAAACATTAAAAAATATAAGATATGTT  
TACAAATTACTATCAGACAATCTCCTTATCTAATAGAAGAGTCAATTAACATAATTGAGTATCTTTAAATTTGAAATGTTAGGAAGTGATTT  
AAATATGAAAACCTAAATTTATAAAAAATCAATATTAATTTATTTTTAAAAAATAGAAAGGAGTGTATAAGATTTATTTTCAAAGTTTAAA  
ACAAGAAAATCAATTTAAATTTTTCAGAAGGAATAAATGTGGTTATAGAAGTGGATTTATTATCAAAAATAATAACTAGGAGGTTTTT

>DSM-29685

ATAAAAATATGTTAAATATATCCTCTTATACTTAAATATATAAAAAATAAACAAAATGATACACTACATAAAAGTGTCTATCTAATATGAA  
GATTTACCAATAAAAAGGTGGACTATGATGAATGCACAGTAGTTCACCTTTTTATATTTCTAATGGTAACAAAATATTTTTTATATAAAA  
CCTAGGAGGCGTTATGAATATGACAATATCTTTTTTATCAGAGCATATATTTATAAAGTTAGTAATTTTAACTATATCATTTGATACATT  
ATTAGGATGTTTAAAGTGAATAAAAAGTCGTAAATTTAATTCAGTTTTGGAAATAGATGGAGGAATCAGAAAAGTAGCAATGATAGCATG  
TATATTTTTTTTTATCAGTAGTTGACATTCTTACAAAGTTTAACTTTTTATTTATGTTACCACAAGATTGTATCAATTTTTTAAAGACTAAA  
ACATCTTGGAAATATCTGAATTTTTCTCTATTTTATTTATTTTATATGAAAGTGAAGTATATAAAAAATATGTGCTTATGTGGATTACC  
AGTACCTAAGAGATTAAGGAAAAAATAGCAATTTTACTAGATGCAATGACAGATGAAATGAATGCTAAGGATGAAAAGTAAGTAATGGT  
AGATATAATAAAGATATTAACAAAATAAAAAGTGTATCCAAAATAAGAATAGCTGAAAGTTATCATAATTCATGAACTAATAATGAAAAC  
GAGGGAGCAGATGCCAAGAGACACACAAGTATTAATACATATAATTTTTCGAAGCAAGTGTTCATTACTATATAGATGACAAGGTAGTATA  
TCAAAACATTGGTTCACAAAGATGGTGCATGGTCAGTTGGTAAAACTATTAAGCTACATTAGTTACAGATATCACAACTATAAATAGTTA  
AACATAGAAATATGTGTAATTTGTGATGGAATTTATTCAAAAACACAAAAATACGTGATGAAGGACAAAATGATATAGAAAATAAGTATC  
AAACCTTAATAAATGATTTAATTTGATAGTTTAAAAGTTATAGGAAAAATATAAAGAAATAAAAACATTAAAAAATATAAGATATGTT  
TACAAATTACTATCAGACAATCTCCTTATCTAATAGAAGAGTCAATTAACATAATTGAGTATCTTTAAATTTGAAATGTTAGGAAGTGATTT  
AAATATGAAAACCTAAATTTATAAAAAATCAATATTAATTTATTTTTAAAAAATAGAAAGGAGTGTATAAGATTTATTTTCAAAGTTTAAA  
ACAAGAAAATCAATTTAAATTTTTCAGAAGGAATAAATGTGGTTATAGAAGTGGATTTATTATCAAAAATAATAACTAGGAGGTTTTT

>DSM-29686

ATAAAAATATGTTAAATATATCCTCTTATACTTAAATATATAAAAAATAAACAAAATGATACACTACATAAAAGTGTCTATCTAATATGAA  
GATTTACCAATAAAAAGGTGGACTATGATGAATGCACAGTAGTTCACCTTTTTATATTTCTAATGGTAACAAAATATTTTTTATATAAAA  
CCTAGGAGGCGTTATGAATATGACAATATCTTTTTTATCAGAGCATATATTTATAAAGTTAGTAATTTTAACTATATCATTTGATACATT  
ATTAGGATGTTTAAAGTGAATAAAAAGTCGTAAATTTAATTCAGTTTTGGAAATAGATGGAGGAATCAGAAAAGTAGCAATGATAGCATG  
TATATTTTTTTTTATCAGTAGTTGACATTCTTACAAAGTTTAACTTTTTATTTATGTTACCACAAGATTGTATCAATTTTTTAAAGACTAAA  
ACATCTTGGAAATATCTGAATTTTTCTCTATTTTATTTATTTTATATGAAAGTGAAGTATATAAAAAATATGTGCTTATGTGGATTACC  
AGTACCTAAGAGATTAAGGAAAAAATAGCAATTTTACTAGATGCAATGACAGATGAAATGAATGCTAAGGATGAAAAGTAAGTAATGGT  
AGATATAATAAAGATATTAACAAAATAAAAAGTGTATCCAAAATAAGAATAGCTGAAAGTTATCATAATTCATGAACTAATAATGAAAAC  
GAGGGAGCAGATGCCAAGAGACACACAAGTATTAATACATATAATTTTTCGAAGCAAGTGTTCATTACTATATAGATGACAAGGTAGTATA  
TCAAAACATTGGTTCACAAAGATGGTGCATGGTCAGTTGGTAAAACTATTAAGCTACATTAGTTACAGATATCACAACTATAAATAGTTA  
AACATAGAAATATGTGTAATTTGTGATGGAATTTATTCAAAAACACAAAAATACGTGATGAAGGACAAAATGATATAGAAAATAAGTATC  
AAACCTTAATAAATGATTTAATTTGATAGTTTAAAAGTTATAGGAAAAATATAAAGAAATAAAAACATTAAAAAATATAAGATATGTT  
TACAAATTACTATCAGACAATCTCCTTATCTAATAGAAGAGTCAATTAACATAATTGAGTATCTTTAAATTTGAAATGTTAGGAAGTGATTT  
AAATATGAAAACCTAAATTTATAAAAAATCAATATTAATTTATTTTTAAAAAATAGAAAGGAGTGTATAAGATTTATTTTCAAAGTTTAAA  
ACAAGAAAATCAATTTAAATTTTTCAGAAGGAATAAATGTGGTTATAGAAGTGGATTTATTATCAAAAATAATAACTAGGAGGTTTTT

&gt;DSM-29687

ATAAAAATATGTTAAATATATCCTCTTATACTTAAATATATAAAAAATAAACAAAATGATACACTACATAAAAGTGTTCATCTAATATGAA  
GATTTACCAATAAAAAGGTGGACTATGATGAATGCACAGTAGTTCACCTTTTTATATTTCTAATGGTAACAAAATATTTTTTATATAAAA  
CCTAGGAGGCGTTATGAATATGACAATATCTTTTTTATCAGAGCATATATTTATAAAGTTAGTAATTTTAACTATATCATTTTGATACATT  
ATTAGGATGTTTAAAGTGAATAAAAAGTCGTAATTTAATTTCTAGTTTTGGAAATAGATGGAGGAATCAGAAAAGTAGCAATGATAGCATG  
TATATTTTTTTTTATCAGTAGTTGACATTCCTTACAAAGTTTAACTTTTTATTTATGTTACCACAAGATTGTATCAATTTTTTAAAGACTAAA  
ACATCTTGGAAATATCTGAATTTTTCTCTATTTTTATTTATTTTATATGAAAGTGTAAAGTATATTAATAATATGTGCTTATGTGGATTACC  
AGTACCTAAGAGATTAAGGAAAAAATAGCAATTTTACTAGATGCAATGACAGATGAAATGAATGCTAAGGATGAAAAGTAAGTAATGGT  
AGATATAATAAAGATATTAACAAATAAAAAGTGTATCCAAATAAGAATAGCTGAAAGTTATCATAATTCATGAAACTAATAATGAAAAC  
GAGGGAGCAGATGCCAAGAGACACACAAGTATTAATAACATATAATTTTGAAGCAAGTGTTCATTACTATATAGATGACAAGGTAGTATA  
TCAAACATTGGTTCACAAAGATGGTGCATGGTCAGTTGGTAAAAATCTATTAAGCTACATTAGTTACAGATATCACAACTATAATAGTTA  
AACATAGAAATATGTGTAATTTGTGATTGAAATTAATTCAAAAACACAAAAATACGTGATGAAGGACAAAATGATATAGAAAAAAGTATC  
AAACCTTAATAAATGATTTAATGATAGTTTTAAAAGTTATAGGAAAAATATAAAGAAATAAAAACATTAATAAATAAAGATATGTT  
TACAAATTACTATCAGACAATCTCCTTATCTAATAGAAGAGTCAATTAACATAATTGAGTATCTTTAAATTGAAATGTTAGGAAGTGATTT  
AAATATGAAAACCTAAATTATAAAAAATCAATATTAATTTATTTTTAAAAAATAGAAAGGAGTGTATAAGATTTATTTTCAAAGTTTAAA  
ACAAGAAAATCAATTTAAATTTTTCAGAAGGAATAAATGTGGTTATAGAAGTGGATTTATTATCAAAAATAATAACTAGGAGGTTTTT

&gt;DSM-29089

ATAAAAATATGTTAAATATATCCTCTTATACTTAAATATATAAAAAATAAACAAAATGATACACTACATAAAAGTGTTCATCTAATATGAA  
GATTTACCAATAAAAAGGTGGACTATGATGAATGCACAGTAGTTCACCTTTTTATATTTCTAATGGTAACAAAATATTTTTTATATAAAA  
CCTAGGAGGCGTTATGAATATGACAATATCTTTTTTATCAGAGCATATATTTATAAAGTTAGTAATTTTAACTATATCATTTTGATACATT  
ATTAGGATGTTTAAAGTGAATAAAAAGTCGTAATTTAATTTCTAGTTTTGGAAATAGATGGAGGAATCAGAAAAGTAGCAATGATAGCATG  
TATATTTTTTTTTATCAGTAGTTGACATTCCTTACAAAGTTTAACTTTTTATTTATGTTACCACAAGATTGTATCAATTTTTTAAAGACTAAA  
ACATCTTGGAAATATCTGAATTTTTCTCTATTTTTATTTATTTTATATGAAAGTGTAAAGTATATTAATAATATGTGCTTATGTGGATTACC  
AGTACCTAAGAGATTAAGGAAAAAATAGCAATTTTACTAGATGCAATGACAGATGAAATGAATGCTAAGGATGAAAAGTAAGTAATGGT  
AGATATAATAAAGATATTAACAAATAAAAAGTGTATCCAAATAAGAATAGCTGAAAGTTATCATAATTCATGAAACTAATAATGAAAAC  
GAGGGAGCAGATGCCAAGAGACACACAAGTATTAATAACATATAATTTTGAAGCAAGTGTTCATTACTATATAGATGACAAGGTAGTATA  
TCAAACATTGGTTCACAAAGATGGTGCATGGTCAGTTGGTAAAAATCTATTAAGCTACATTAGTTACAGATATCACAACTATAATAGTTA  
AACATAGAAATATGTGTAATTTGTGATGGAATTAATTCAAAAACACAAAAATACGTGATGAAGGACAAAATGATATAGAAAAAAGTATC  
AAACCTTAATAAATGATTTAATGATAGTTTTAAAAGTTATAGGAAAAATATAAAGAAATAAAAACATTAATAAATAAAGATATGTT  
TACAAATTACTATCAGACAATCTCCTTATCTAATAGAAGAGTCAATTAACATAATTGAGTATCTTTAAATTGAAATGTTAGGAAGTGATTT  
AAATATGAAAACCTAAATTATAAAAAATCAATATTAATTTATTTTTAAAAAATAGAAAGGAGTGTATAAGATTTATTTTCAAAGTTTAAA  
ACAAGAAAATCAATTTAAATTTTTCAGAAGGAATAAATGTGGTTATAGAAGTGGATTTATTATCAAAAATAATAACTAGGAGGTTTTT

&gt;DSM-29689

ATAAAAATATGTTAAATATATCCTCTTATACTTAAATATATAAAAAATAAACAAAATGATACACTACATAAAAGTGTTCATCTAATATGAA  
GATTTACCAATAAAAAGGTGGACTATGATGAATGCACAGTAGTTCACCTTTTTATATTTCTAATGGTAACAAAATATTTTTTATATAAAA  
CCTAGGAGGCGTTATGAATATGACAATATCTTTTTTATCAGAGCATATATTTATAAAGTTAGTAATTTTAACTATATCATTTTGATACATT  
ATTAGGATGTTTAAAGTGAATAAAAAGTCGTAATTTAATTTCTAGTTTTGGAAATAGATGGAGGAATCAGAAAAGTAGCAATGATAGCATG  
TATATTTTTTTTTATCAGTAGTTGACATTCCTTACAAAGTTTAACTTTTTATTTATGTTACCACAAGATTGTATCAATTTTTTAAAGACTAAA  
ACATCTTGGAAATATCTGAATTTTTCTCTATTTTTATTTATTTTATATGAAAGTGTAAAGTATATTAATAATATGTGCTTATGTGGATTACC  
AGTACCTAAGAGATTAAGGAAAAAATAGCAATTTTACTAGATGCAATGACAGATGAAATGAATGCTAAGGATGAAAAGTAAGTAATGGT  
AGATATAATAAAGATATTAACAAATAAAAAGTGTATCCAAATAAGAATAGCTGAAAGTTATCATAATTCATGAAACTAATAATGAAAAC  
GAGGGAGCAGATGCCAAGAGACACACAAGTATTAATAACATATAATTTTGAAGCAAGTGTTCATTACTATATAGATGACAAGGTAGTATA  
TCAAACATTGGTTCACAAAGATGGTGCATGGTCAGTTGGTAAAAATCTATTAAGCTACATTAGTTACAGATATCACAACTATAATAGTTA  
AACATAGAAATATGTGTAATTTGTGATGGAATTAATTCAAAAACACAAAAATACGTGATGAAGGACAAAATGATATAGAAAAAAGTATC  
AAACCTTAATAAATGATTTAATGATAGTTTTAAAAGTTATAGGAAAAATATAAAGAAATAAAAACATTAATAAATAAAGATATGTT  
TACAAATTACTATCAGACAATCTCCTTATCTAATAGAAGAGTCAATTAACATAATTGAGTATCTTTAAATTGAAATGTTAGGAAGTGATTT  
AAATATGAAAACCTAAATTATAAAAAATCAATATTAATTTATTTTTAAAAAATAGAAAGGAGTGTATAAGATTTATTTTCAAAGTTTAAA  
ACAAGAAAATCAATTTAAATTTTTCAGAAGGAATAAATGTGGTTATAGAAGTGGATTTATTATCAAAAATAATAACTAGGAGGTTTTT

>DSM-29690

ATAAAAATATGTTAAATATATCCTCTTATACTTAAATATATAAAAAATAAACAAAATGATACACTACATAAAAGTGTCTATCTAATATGAA  
GATTTACCAATAAAAAAGGTGGACTATGATGAATGCACAGTAGTTCACCTTTTTATATTTCTAATGGTAACAAAATATTTTTTATATAAAA  
CCTAGGAGGCGTTATGAATATGACAATATCTTTTTTATCAGAGCATATATTTATAAAGTTAGTAATTTTAACTATATCATTTGATACATT  
ATTAGGATGTTTAAAGTGAATAAAAAAGTCGTAAATTTAATTCAGTTTTGGAAATAGATGGAGGAATCAGAAAAGTAGCAATGATAGCATG  
TATATTTTTTTTTATCAGTAGTTGACATTCTTACAAAGTTTAACTTTTTATTTATGTTACCACAAGATTGTATCAATTTTTTAAAGACTAAA  
ACATCTTGGAAATATCTGAATTTTTCTCTATTTTATTTATTTTATATGAAAGTGAAGTATATAAAAAATATGTGCTTATGTGGATTACC  
AGTACCTAAGAGATTAAGGAAAAAATAGCAATTTTACTAGATGCAATGACAGATGAAATGAATGCTAAGGATGAAAAGTAAAGTAATGGT  
AGATATAATAAAGATATTAACAAAATAAAAAGTGTATCCAAAATAAGAATAGCTGAAAGTTATCATAATTCATGAACTAATAATGAAAAC  
GAGGGAGCAGATGCCAAGAGACACACAAGTATTAATACATATAATTTTTCGAAGCAAGTGTTTCATTACTATATAGATGACAAGGTAGTATA  
TCAAAACATTGGTTCACAAAGATGGTGCATGGTCAGTTGGTAAAACTATTAAGCTACATTAGTTACAGATATCACAAACTATAAATAGTTA  
AACATAGAAAATATGTGTAATTTGTGATTGAAATTTATTCAAAAACACAAAAATACGTGATGAAGGACAAAATGATATAGAAAATAAGTATC  
AAACCTTAATAAATGATTTAATTTGATAGTTTAAAAGTTATAGGAAAAATATATAAAGAAATAAAAACATTAAAAAATATAAGATATGTT  
TACAAATTACTATCAGACAATCTCCTTATCTAATAGAAGAGTCAATTAACATAATTGAGTATCTTTAAATTTGAAATGTTAGGAAGTGATTT  
AAATATGAAAACCTAAATTTATAAAAAATCAATATTAATTTATTTTTAAAAAATAGAAAGGAGTGTATAAGATTTATTTTCAAAGTTTAAA  
ACAAGAAAATCAATTTAAATTTTTCAGAAGGAATAAATGTGGTTATAGAAGTGGATTTATTATCAAAAATAATAACTAGGAGGTTTTT

>DSM-29691

ATAAAAATATGTTAAATATATCCTCTTATACTTAAATATATAAAAAATAAACAAAATGATACACTACATAAAAGTGTCTATCTAATATGAA  
GATTTACCAATAAAAAAGGTGGACTATGATGAATGCACAGTAGTTCACCTTTTTATATTTCTAATGGTAACAAAATATTTTTTATATAAAA  
CCTAGGAGGCGTTATGAATATGACAATATCTTTTTTATCAGAGCATATATTTATAAAGTTAGTAATTTTAACTATATCATTTGATACATT  
ATTAGGATGTTTAAAGTGAATAAAAAAGTCGTAAATTTAATTCAGTTTTGGAAATAGATGGAGGAATCAGAAAAGTAGCAATGATAGCATG  
TATATTTTTTTTTATCAGTAGTTGACATTCTTACAAAGTTTAACTTTTTATTTATGTTACCACAAGATTGTATCAATTTTTTAAAGACTAAA  
ACATCTTGGAAATATCTGAATTTTTCTCTATTTTATTTATTTTATATGAAAGTGAAGTATATAAAAAATATGTGCTTATGTGGATTACC  
AGTACCTAAGAGATTAAGGAAAAAATAGCAATTTTACTAGATGCAATGACAGATGAAATGAATGCTAAGGATGAAAAGTAAAGTAATGGT  
AGATATAATAAAGATATTAACAAAATAAAAAGTGTATCCAAAATAAGAATAGCTGAAAGTTATCATAATTCATGAACTAATAATGAAAAC  
GAGGGAGCAGATGCCAAGAGACACACAAGTATTAATACATATAATTTTTCGAAGCAAGTGTTTCATTACTATATAGATGACAAGGTAGTATA  
TCAAAACATTGGTTCACAAAGATGGTGCATGGTCAGTTGGTAAAACTATTAAGCTACATTAGTTACAGATATCACAAACTATAAATAGTTA  
AACATAGAAAATATGTGTAATTTGTGATTGAAATTTATTCAAAAACACAAAAATACGTGATGAAGGACAAAATGATATAGAAAATAAGTATC  
AAACCTTAATAAATGATTTAATTTGATAGTTTAAAAGTTATAGGAAAAATATATAAAGAAATAAAAACATTAAAAAATATAAGATATGTT  
TACAAATTACTATCAGACAATCTCCTTATCTAATAGAAGAGTCAATTAACATAATTGAGTATCTTTAAATTTGAAATGTTAGGAAGTGATTT  
AAATATGAAAACCTAAATTTATAAAAAATCAATATTAATTTATTTTTAAAAAATAGAAAGGAGTGTATAAGATTTATTTTCAAAGTTTAAA  
ACAAGAAAATCAATTTAAATTTTTCAGAAGGAATAAATGTGGTTATAGAAGTGGATTTATTATCAAAAATAATAACTAGGAGGTTTTT

>DSM-29692

ATAAAAATATGTTAAATATATCCTCTTATACTTAAATATATAAAAAATAAACAAAATGATACACTACATAAAAGTGTCTATCTAATATGAA  
GATTTACCAATAAAAAAGGTGGACTATGATGAATGCACAGTAGTTCACCTTTTTATATTTCTAATGGTAACAAAATATTTTTTATATAAAA  
CCTAGGAGGCGTTATGAATATGACAATATCTTTTTTATCAGAGCATATATTTATAAAGTTAGTAATTTTAACTATATCATTTGATACATT  
ATTAGGATGTTTAAAGTGAATAAAAAAGTCGTAAATTTAATTCAGTTTTGGAAATAGATGGAGGAATCAGAAAAGTAGCAATGATAGCATG  
TATATTTTTTTTTATCAGTAGTTGACATTCTTACAAAGTTTAACTTTTTATTTATGTTACCACAAGATTGTATCAATTTTTTAAAGACTAAA  
ACATCTTGGAAATATCTGAATTTTTCTCTATTTTATTTATTTTATATGAAAGTGAAGTATATAAAAAATATGTGCTTATGTGGATTACC  
AGTACCTAAGAGATTAAGGAAAAAATAGCAATTTTACTAGATGCAATGACAGATGAAATGAATGCTAAGGATGAAAAGTAAAGTAATGGT  
AGATATAATAAAGATATTAACAAAATAAAAAGTGTATCCAAAATAAGAATAGCTGAAAGTTATCATAATTCATGAACTAATAATGAAAAC  
GAGGGAGCAGATGCCAAGAGACACACAAGTATTAATACATATAATTTTTCGAAGCAAGTGTTTCATTACTATATAGATGACAAGGTAGTATA  
TCAAAACATTGGTTCACAAAGATGGTGCATGGTCAGTTGGTAAAACTATTAAGCTACATTAGTTACAGATATCACAAACTATAAATAGTTA  
AACATAGAAAATATGTGTAATTTGTGATTGAAATTTATTCAAAAACACAAAAATACGTGATGAAGGACAAAATGATATAGAAAATAAGTATC  
AAACCTTAATAAATGATTTAATTTGATAGTTTAAAAGTTATAGGAAAAATATATAAAGAAATAAAAACATTAAAAAATATAAGATATGTT  
TACAAATTACTATCAGACAATCTCCTTATCTAATAGAAGAGTCAATTAACATAATTGAGTATCTTTAAATTTGAAATGTTAGGAAGTGATTT  
AAATATGAAAACCTAAATTTATAAAAAATCAATATTAATTTATTTTTAAAAAATAGAAAGGAGTGTATAAGATTTATTTTCAAAGTTTAAA  
ACAAGAAAATCAATTTAAATTTTTCAGAAGGAATAAATGTGGTTATAGAAGTGGATTTATTATCAAAAATAATAACTAGGAGGTTTTT

&gt;DSM-29091

ATAAAAATATGTTAAATATATCCTCTTATACTTAAATATATAAAAAATAACAAAATGATACACTACATAAAAGTGTTCATCTAATATGAA  
 GATTTACCAATAAAAAGGTGGACTATGATGAATGCACAGTAGTTCACCTTTTTATATTTCTAATGGTAACAAAATATTTTTTATATAAAA  
 CCTAGGAGGCGTTATGAATATGACAATATCTTTTTTATCAGAGCATATATTTATAAAGTTAGTAATTTTAACTATATCATTTTGATACATT  
 ATTAGGATGTTTAAAGTGAATAAAAAGTCGTAATTTAATTTCTAGTTTTGGAAATAGATGGAGGAATCAGAAAAGTAGCAATGATAGCATG  
 TATATTTTTTTTTATCAGTAGTTGACATTCCTTACAAAGTTTAACTTTTTATTATGTTACCACAAGATTGTATCAATTTTTTAAAGACTAAA  
 ACATCTTGGAAATATCTGAATTTTTCTCTATTTTTATTTATTTTATATGAAAGTGTAAAGTATATTAATAAATATGTGCTTATGTGGATTACC  
 AGTACCTAAGAGATTAAGGAAAAAATAGCAATTTTACTAGATGCAATGACAGATGAAATGAATGCTAAGGATGAAAAGTAAGTAATGGT  
 AGATATAATAAAGATATTAACAAATAAAAAGTGTATCCAAATAAGAATAGCTGAAAGTTATCATAATTCATGAAACTAATAATGAAAAC  
 GAGGGAGCAGATGCCAAGAGACACACAAGTATTAATAACATATAATTTTGAAGCAAGTGTTCATTACTATATAGATGACAAGGTAGTATA  
 TCAAAACATTGGTTCACAAAGATGGTGCATGGTCAGTTGGTAAAACTATTAAGCTACATTAGTTACAGATATCACAAACTATAATAGTTA  
 AACATAGAAATATGTGTAATTTGTGATGGAAATTAATTCAAAAACACAAAAATACGTGATGAAGGACAAAATGATATAGAAAAAAGTATC  
 AAACCTTAATAAATGATTTAATGATAGTTTTAAAAGTTATAGGAAAAATATAAAGAAATAAAAACATTAATAAATATAAGATATGTT  
 TACAAATTACTATCAGACAATCTCCTTATCTAATAGAAGAGTCAATTAACATAATTGAGTATCTTTAAATTGAAATGTTAGGAAGTGATTT  
 AAATATGAAAACCTAAATTATAAAAAATCAATATTAATTTATTTTTAAAAAATAGAAAGGAGTGTATAAGATTTATTTTCAAAGTTTAAA  
 AACAAGAAAATCAATTTAAATTTTTCAGAAGGAATAAATGTGGTTATAGAAGTGGATTTATTATCAAAAATAATAACTAGGAGGTTTTT

&gt;630

ATAAAAATATGTTAAATATATCCTCTTATACTTAAATATATAAAAAATAACAAAATGATACACTACATAAAAGTGTTCATCTAATATGAA  
 GATTTACCAATAAAAAGGTGGACTATGATGAATGCACAGTAGTTCACCTTTTTATATTTCTAATGGTAACAAAATATTTTTTATATAAAA  
 CCTAGGAGGCGTTATGAATATGACAATATCTTTTTTATCAGAGCATATATTTATAAAGTTAGTAATTTTAACTATATCATTTTGATACATT  
 ATTAGGATGTTTAAAGTGAATAAAAAGTCGTAATTTAATTTCTAGTTTTGGAAATAGATGGAGGAATCAGAAAAGTAGCAATGATAGCATG  
 TATATTTTTTTTTATCAGTAGTTGACATTCCTTACAAAGTTTAACTTTTTATTATGTTACCACAAGATTGTATCAATTTTTTAAAGACTAAA  
 ACATCTTGGAAATATCTGAATTTTTCTCTATTTTTATTTATTTTATATGAAAGTGTAAAGTATATTAATAAATATGTGCTTATGTGGATTACC  
 AGTACCTAAGAGATTAAGGAAAAAATAGCAATTTTACTAGATGCAATGACAGATGAAATGAATGCTAAGGATGAAAAGTAAGTAATGGT  
 AGATATAATAAAGATATTAACAAATAAAAAGTGTATCCAAATAAGAATAGCTGAAAGTTATCATAATTCATGAAACTAATAATGAAAAC  
 GAGGGAGCAGATGCCAAGAGACACACAAGTATTAATAACATATAATTTTGAAGCAAGTGTTCATTACTATATAGATGACAAGGTAGTATA  
 TCAAAACATTGGTTCACAAAGATGGTGCATGGTCAGTTGGTAAAACTATTAAGCTACATTAGTTACAGATATCACAAACTATAATAGTTA  
 AACATAGAAATATGTGTAATTTGTGATGGAAATTAATTCAAAAACACAAAAATACGTGATGAAGGACAAAATGATATAGAAAAAAGTATC  
 AAACCTTAATAAATGATTTAATGATAGTTTTAAAAGTTATAGGAAAAATATAAAGAAATAAAAACATTAATAAATATAAGATATGTT  
 TACAAATTACTATCAGACAATCTCCTTATCTAATAGAAGAGTCAATTAACATAATTGAGTATCTTTAAATTGAAATGTTAGGAAGTGATTT  
 AAATATGAAAACCTAAATTATAAAAAATCAATATTAATTTATTTTTAAAAAATAGAAAGGAGTGTATAAGATTTATTTTCAAAGTTTAAA  
 AACAAGAAAATCAATTTAAATTTTTCAGAAGGAATAAATGTGGTTATAGAAGTGGATTTATTATCAAAAATAATAACTAGGAGGTTTTT

&gt;630-delta-erm

ATAAAAATATGTTAAATATATCCTCTTATACTTAAATATATAAAAAATAACAAAATGATACACTACATAAAAGTGTTCATCTAATATGAA  
 GATTTACCAATAAAAAGGTGGACTATGATGAATGCACAGTAGTTCACCTTTTTATATTTCTAATGGTAACAAAATATTTTTTATATAAAA  
 CCTAGGAGGCGTTATGAATATGACAATATCTTTTTTATCAGAGCATATATTTATAAAGTTAGTAATTTTAACTATATCATTTTGATACATT  
 ATTAGGATGTTTAAAGTGAATAAAAAGTCGTAATTTAATTTCTAGTTTTGGAAATAGATGGAGGAATCAGAAAAGTAGCAATGATAGCATG  
 TATATTTTTTTTTATCAGTAGTTGACATTCCTTACAAAGTTTAACTTTTTATTATGTTACCACAAGATTGTATCAATTTTTTAAAGACTAAA  
 ACATCTTGGAAATATCTGAATTTTTCTCTATTTTTATTTATTTTATATGAAAGTGTAAAGTATATTAATAAATATGTGCTTATGTGGATTACC  
 AGTACCTAAGAGATTAAGGAAAAAATAGCAATTTTACTAGATGCAATGACAGATGAAATGAATGCTAAGGATGAAAAGTAAGTAATGGT  
 AGATATAATAAAGATATTAACAAATAAAAAGTGTATCCAAATAAGAATAGCTGAAAGTTATCATAATTCATGAAACTAATAATGAAAAC  
 GAGGGAGCAGATGCCAAGAGACACACAAGTATTAATAACATATAATTTTGAAGCAAGTGTTCATTACTATATAGATGACAAGGTAGTATA  
 TCAAAACATTGGTTCACAAAGATGGTGCATGGTCAGTTGGTAAAACTATTAAGCTACATTAGTTACAGATATCACAAACTATAATAGTTA  
 AACATAGAAATATGTGTAATTTGTGATGGAAATTAATTCAAAAACACAAAAATACGTGATGAAGGACAAAATGATATAGAAAAAAGTATC  
 AAACCTTAATAAATGATTTAATGATAGTTTTAAAAGTTATAGGAAAAATATAAAGAAATAAAAACATTAATAAATATAAGATATGTT  
 TACAAATTACTATCAGACAATCTCCTTATCTAATAGAAGAGTCAATTAACATAATTGAGTATCTTTAAATTGAAATGTTAGGAAGTGATTT  
 AAATATGAAAACCTAAATTATAAAAAATCAATATTAATTTATTTTTAAAAAATAGAAAGGAGTGTATAAGATTTATTTTCAAAGTTTAAA  
 AACAAGAAAATCAATTTAAATTTTTCAGAAGGAATAAATGTGGTTATAGAAGTGGATTTATTATCAAAAATAATAACTAGGAGGTTTTT

>DSM-29092

ATAAAAATATGTTAAATATATCCTCTTATACTTAAATATATAAAAAATAAACAAAATGATACACTACATAAAAGTGTCTATCTAATATGAA  
GATTTACCAATAAAAAGGTGGACTATGATGAATGCACAGTAGTTCACCTTTTTATATTTCTAATGGTAACAAAATATTTTTTATATAAAA  
CCTAGGAGGCGTTATGAATATGACAATATCTTTTTTATCAGAGCATATATTTATAAAGTTAGTAATTTTAACTATATCATTTGATACATT  
ATTAGGATGTTTAAAGTGAATAAAAAGTCGTAAATTTAATTCAGTTTTGGAAATAGATGGAGGAATCAGAAAAGTAGCAATGATAGCATG  
TATATTTTTTTTTATCAGTAGTTGACATTCTTACAAAGTTTAACTTTTTATTTATGTTACCACAAGATTGTATCAATTTTTTAAAGACTAAA  
ACATCTTGGAAATATCTGAATTTTTCTCTATTTTATTTTATATGAAAGTGAAGTATATAAAAAATATGTGCTTATGTGGATTACC  
AGTACCTAAGAGATTAAGGAAAAAATAGCAATTTTACTAGATGCAATGACAGATGAAATGAATGCTAAGGATGAAAAGTAAGTAATGGT  
AGATATAATAAAGATATTAACAAAATAAAAAGTGTATCCAAAATAAGAATAGCTGAAAGTTATCATAATTCATGAACTAATAATGAAAAC  
GAGGGAGCAGATGCCAAGAGACACACAAGTATTAATACATATAATTTTGAAGCAAGTGTTCATTACTATATAGATGACAAGGTAGTATA  
TCAAAACATTGGTTCACAAAGATGGTGCATGGTCAGTTGGTAAAACTATTAAGCTACATTAGTTACAGATATCACAACTATAAATAGTTA  
AACATAGAAAATATGTGTAATTTGTGATTGAAATTTATTCAAAAACACAAAAATACGTGATGAAGGACAAAATGATATAGAAAATAAGTATC  
AAACCTTAATAAATGATTTAATTTGATAGTTTAAAAGTTATAGGAAAAATATAAAGAAATAAAAACATTAAAAAATATAAGATATGTT  
TACAAATTACTATCAGACAATCTCCTTATCTAATAGAAGAGTCAATTAACATAATTGAGTATCTTTAAATTGAAATGTTAGGAAGTGATTT  
AAATATGAAAACCTAAATTATAAAAAATCAATATTAATTTATTTTTAAAAAATAGAAAGGAGTGATAAGATTTATTTTCAAAGTTTAAA  
ACAAGAAAATCAATTTAAATTTTTCAGAAGGAATAAATGTGGTTATAGAAGTGATTTATTATCAAAAATAATAACTAGGAGGTTTTT

>DSM-29744

ATAAAAATATGTTAAATATATCCTCTTATACTTAAATATATAAAAAATAAACAAAATGATACACTACATAAAAGTGTCTATCTAATATGAA  
GATTTACCAATAAAAAGGTGGACTATGATGAATGCACAGTAGTTCACCTTTTTATATTTCTAATGGTAACAAAATATTTTTTATATAAAA  
CCTAGGAGGCGTTATGAATATGACAATATCTTTTTTATCAGAGCATATATTTATAAAGTTAGTAATTTTAACTATATCATTTGATACATT  
ATTAGGATGTTTAAAGTGAATAAAAAGTCGTAAATTTAATTCAGTTTTGGAAATAGATGGAGGAATCAGAAAAGTAGCAATGATAGCATG  
TATATTTTTTTTTATCAGTAGTTGACATTCTTACAAAGTTTAACTTTTTATTTATGTTACCACAAGATTGTATCAATTTTTTAAAGACTAAA  
ACATCTTGGAAATATCTGAATTTTTCTCTATTTTATTTTATTTTATATGAAAGTGAAGTATATAAAAAATATGTGCTTATGTGGATTACC  
AGTACCTAAGAGATTAAGGAAAAAATAGCAATTTTACTAGATGCAATGACAGATGAAATGAATGCTAAGGATGAAAAGTAAGTAATGGT  
AGATATAATAAAGATATTAACAAAATAAAAAGTGTATCCAAAATAAGAATAGCTGAAAGTTATCATAATTCATGAACTAATAATGAAAAC  
GAGGGAGCAGATGCCAAGAGACACACAAGTATTAATACATATAATTTTGAAGCAAGTGTTCATTACTATATAGATGACAAGGTAGTATA  
TCAAAACATTGGTTCACAAAGATGGTGCATGGTCAGTTGGTAAAACTATTAAGCTACATTAGTTACAGATATCACAACTATAAATAGTTA  
AACATAGAAAATATGTGTAATTTGTGATGGAATTTATTCAAAAACACAAAAATACGTGATGAAGGACAAAATGATATAGAAAATAAGTATC  
AAACCTTAATAAATGATTTAATTTGATAGTTTAAAAGTTATAGGAAAAATATAAAGAAATAAAAACATTAAAAAATATAAGATATGTT  
TACAAATTACTATCAGACAATCTCCTTATCTAATAGAAGAGTCAATTAACATAATTGAGTATCTTTAAATTGAAATGTTAGGAAGTGATTT  
AAATATGAAAACCTAAATTATAAAAAATCAATATTAATTTATTTTTAAAAAATAGAAAGGAGTGATAAGATTTATTTTCAAAGTTTAAA  
ACAAGAAAATCAATTTAAATTTTTCAGAAGGAATAAATGTGGTTATAGAAGTGATTTATTATCAAAAATAATAACTAGGAGGTTTTT

>DSM-29745

ATAAAAATATGTTAAATATATCCTCTTATACTTAAATATATAAAAAATAAACAAAATGATACACTACATAAAAGTGTCTATCTAATATGAA  
GATTTACCAATAAAAAGGTGGACTATGATGAATGCACAGTAGTTCACCTTTTTATATTTCTAATGGTAACAAAATATTTTTTATATAAAA  
CCTAGGAGGCGTTATGAATATGACAATATCTTTTTTATCAGAGCATATATTTATAAAGTTAGTAATTTTAACTATATCATTTGATACATT  
ATTAGGATGTTTAAAGTGAATAAAAAGTCGTAAATTTAATTCAGTTTTGGAAATAGATGGAGGAATCAGAAAAGTAGCAATGATAGCATG  
TATATTTTTTTTTATCAGTAGTTGACATTCTTACAAAGTTTAACTTTTTATTTATGTTACCACAAGATTGTATCAATTTTTTAAAGACTAAA  
ACATCTTGGAAATATCTGAATTTTTCTCTATTTTATTTTATTTTATATGAAAGTGAAGTATATAAAAAATATGTGCTTATGTGGATTACC  
AGTACCTAAGAGATTAAGGAAAAAATAGCAATTTTACTAGATGCAATGACAGATGAAATGAATGCTAAGGATGAAAAGTAAGTAATGGT  
AGATATAATAAAGATATTAACAAAATAAAAAGTGTATCCAAAATAAGAATAGCTGAAAGTTATCATAATTCATGAACTAATAATGAAAAC  
GAGGGAGCAGATGCCAAGAGACACACAAGTATTAATACATATAATTTTGAAGCAAGTGTTCATTACTATATAGATGACAAGGTAGTATA  
TCAAAACATTGGTTCACAAAGATGGTGCATGGTCAGTTGGTAAAACTATTAAGCTACATTAGTTACAGATATCACAACTATAAATAGTTA  
AACATAGAAAATATGTGTAATTTGTGATGGAATTTATTCAAAAACACAAAAATACGTGATGAAGGACAAAATGATATAGAAAATAAGTATC  
AAACCTTAATAAATGATTTAATTTGATAGTTTAAAAGTTATAGGAAAAATATAAAGAAATAAAAACATTAAAAAATATAAGATATGTT  
TACAAATTACTATCAGACAATCTCCTTATCTAATAGAAGAGTCAATTAACATAATTGAGTATCTTTAAATTGAAATGTTAGGAAGTGATTT  
AAATATGAAAACCTAAATTATAAAAAATCAATATTAATTTATTTTTAAAAAATAGAAAGGAGTGATAAGATTTATTTTCAAAGTTTAAA  
ACAAGAAAATCAATTTAAATTTTTCAGAAGGAATAAATGTGGTTATAGAAGTGATTTATTATCAAAAATAATAACTAGGAGGTTTTT

&gt;DSM-29747

ATAAAAATATGTTAAATATATCCTCTTATACTTAAATATATAAAAAATAAACAAAATGATACACTACATAAAAGTGTTCATCTAATATGAA  
 GATTTACCAATAAAAAGGTGAACTATGATGAATTCACAGTAGTTCACCTTTTTATATTTCTAATGGTAACAAAATATTTTTTATATAAAA  
 CCTAGGAGGCGTTATGAATATGACAATATCTTTTTTATCAGAGCATATATTTATAAAGTTAGTAATTTTAACTATATCATTTTGATACATT  
 ATTAGGATGTTTAAAGTGAATAAAAAGTCGTAATTTAATTCAGTTTTGGAAATAGATGGAGGAATCAGAAAAGTAGCAATGATAGCATG  
 TATATTTTTTTTTATCAGTAGTTGACATTCCTTACAAAGTTTAACTTTTTATTTATGTTACCACAAGATTGTATCAATTTTTTAAAGACTAAA  
 ACATCTTGGAATATCTGAATTTTTCTCTATTTTTATTTATTTTATATGAAAGTGAAGTATATTAATAAATATGTGCTTATGTGGATTACC  
 AGTACCTAAGAGATTAAGGAAAAAATAGCAGTTTTACTAGATGCAATGACAGATGAAATGAATGCTAAGGATGAAAAGTAACTACTGGT  
 AGATATAATAAAGATATTAACAAATAAAAAGTGTATCCAAATAAGAATAGCTGAAAGTTATCATAATTCATGAAACTGATAATGAAAAC  
 GAGGGAGCAGATGCCAAGAGACACACAAGTATTAATAACATATAATTTTGAAGCAAGTGTTCATTACTATATGGATGACAAGGTAGTATA  
 TCAAAACATTGGTTCACAAAGATGGTGCATGGTCAGTTGGTAAAAATCTATTAAGCTACATTAGTTACAGATATCACAAACTATAATAGTTA  
 AACATAGAAATATGTGTAATTTGTGATGGAAATTAATTCAAAAACACAAAAATACGTGATGAAGGACAAAATGATAGAGAAAAAAGTATC  
 AAACCTTAATAAATGATTTAATGATAGTTTAAAAGTTATAGGAAAAATATAAAGAAATAAAAACATTAATAAATATAAGATATGTT  
 TACAAATTACTATCAGACAATCTCCTTATCTAATAGAAAGTCAATTAACATAATTGAGTATCTTTAAATGAAATGTTAGGAAGTGATTT  
 AAATATGAAAACCTAAATTTAAAAAATCAATATTAATTTATTTTTAAAAAATAGAAAGGAGTGTATAAGATTTATTTTCAAAGTTTAAA  
 AAAAAAGAAATCAATTTAAATTTTCAAGAAGGAATAAATGTGGTTATAGAAGTGGATTTATTATCAAAAATAATAACTAGGAGGTTTTT

&gt;DSM-29093

ATAAAAATATGTTAAATATATCCTCTTATACTTAAATATATAAAAAATAAACAAAATGATACACTACATAAAAGTGTTCATCTAATATGAA  
 GATTTACCAATAAAAAGGTGGACTATGATGAATGCACAGTAGTTCACCTTTTTATATTTCTAATGGTAACAAAATATTTTTTATATAAAA  
 CCTAGGAGGCGTTATGAATATGACAATATCTTTTTTATCAGAGCATATATTTATAAAGTTAGTAATTTTAACTATATCATTTTGATACATT  
 ATTAGGATGTTTAAAGTGAATAAAAAGTCGTAATTTAATTCAGTTTTGGAAATAGATGGAGGAATCAGAAAAGTAGCAATGATAGCATG  
 TATATTTTTTTTTATCAGTAGTTGACATTCCTTACAAAGTTTAACTTTTTATTTATGTTACCACAAGATTGTATCAATTTTTTAAAGACTAAA  
 ACATCTTGGAATATCTGAATTTTTCTCTATTTTTATTTATTTTATATGAAAGTGAAGTATATTAATAAATATGTGCTTATGTGGATTACC  
 AGTACCTAAGAGATTAAGGAAAAAATAGCAATTTTTACTAGATGCAATGACAGATGAAATGAATGCTAAGGATGAAAAGTAACTAAATGGT  
 AGATATAATAAAGATATTAACAAATAAAAAGTGTATCCAAATAAGAATAGCTGAAAGTTATCATAATTCATGAAACTAATAATGAAAAC  
 GAGGGAGCAGATGCCAAGAGACACACAAGTATTAATAACATATAATTTTGAAGCAAGTGTTCATTACTATATAGATGACAAGGTAGTATA  
 TCAAAACATTGGTTCACAAAGATGGTGCATGGTCAGTTGGTAAAAATCTATTAAGCTACATTAGTTACAGATATCACAAACTATAATAGTTA  
 AACATAGAAATATGTGTAATTTGTGATGAAATTAATTCAAAAACACAAAAATACGTGATGAAGGACAAAATGATAGAGAAAAAAGTATC  
 AAACCTTAATAAATGATTTAATGATAGTTTAAAAGTTATAGGAAAAATATAAAGAAATAAAAACATTAATAAATATAAGATATGTT  
 TACAAATTACTATCAGACAATCTCCTTATCTAATAGAAAGTCAATTAACATAATTGAGTATCTTTAAATGAAATGTTAGGAAGTGATTT  
 AAATATGAAAACCTAAATTTAAAAAATCAATATTAATTTATTTTTAAAAAATAGAAAGGAGTGTATAAGATTTATTTTCAAAGTTTAAA  
 AACAAGAAATCAATTTAAATTTTCAAGAAGGAATAAATGTGGTTATAGAAGTGGATTTATTATCAAAAATAATAACTAGGAGGTTTTT

&gt;DSM-29752

ATAAAAATATGTTAAATATATCCTCTTATACTTAAATATATAAAAAATAAACAAAATGATACACTACATAAAAGTGTTCATCTAATATGAA  
 GATTTACCAATAAAAAGGTGAACTATGATGAATTCACAGTAGTTCACCTTTTTATATTTCTAATGGTAACAAAATATTTTTTATATAAAA  
 CCTAGGAGGCGTTATGAATATGACAATATCTTTTTTATCAGAGCATATATTTATAAAGTTAGTAATTTTAACTATATCATTTTGATACATT  
 ATTAGGATGTTTAAAGTGAATAAAAAGTCGTAATTTAATTCAGTTTTGGAAATAGATGGAGGAATCAGAAAAGTAGCAATGATAGCATG  
 TATATTTTTTTTTATCAGTAGTTGACATTCCTTACAAAGTTTAACTTTTTATTTATGTTACCACAAGATTGTATCAATTTTTTAAAGACTAAA  
 ACATCTTGGAATATCTGAATTTTTCTCTATTTTTATTTATTTTATATGAAAGTGAAGTATATTAATAAATATGTGCTTATGTGGATTACC  
 AGTACCTAAGAGATTAAGGAAAAAATAGCAGTTTTACTAGATGCAATGACAGATGAAATGAATGCTAAGGATGAAAAGTAACTACTGGT  
 AGATATAATAAAGATATTAACAAATAAAAAGTGTATCCAAATAAGAATAGCTGAAAGTTATCATAATTCATGAAACTGATAATGAAAAC  
 GAGGGAGCAGATGCCAAGAGACACACAAGTATTAATAACATATAATTTTGAAGCAAGTGTTCATTACTATATGGATGACAAGGTAGTATA  
 TCAAAACATTGGTTCACAAAGATGGTGCATGGTCAGTTGGTAAAAATCTATTAAGCTACATTAGTTACAGATATCACAAACTATAATAGTTA  
 AACATAGAAATATGTGTAATTTGTGATGAAATTAATTCAAAAACACAAAAATACGTGATGAAGGACAAAATGATAGAGAAAAAAGTATC  
 AAACCTTAATAAATGATTTAATGATAGTTTAAAAGTTATAGGAAAAATATAAAGAAATAAAAACATTAATAAATATAAGATATGTT  
 TACAAATTACTATCAGACAATCTCCTTATCTAATAGAAAGTCAATTAACATAATTGAGTATCTTTAAATGAAATGTTAGGAAGTGATTT  
 AAATATGAAAACCTAAATTTAAAAAATCAATATTAATTTATTTTTAAAAAATAGAAAGGAGTGTATAAGATTTATTTTCAAAGTTTAAA  
 AAAAAAGAAATCAATTTAAATTTTCAAGAAGGAATAAATGTGGTTATAGAAGTGGATTTATTATCAAAAATAATAACTAGGAGGTTTTT

>DSM-29753

ATAAAAATATGTTAAATATATCCTCTTATACTTAAATATATAAAAAATAAACAAAATGATACACTACATAAAAGTGTCTATCTAATATGAA  
GATTTACCAATAAAAAGGTGAACTATGATGAATTCACAGTAGTTCACCTTTTTATATTTCTAATGGTAACAAAATATTTTTTATATAAAA  
CCTAGGAGGCGTTATGAATATGACAATATCTTTTTTATCAGAGCATATATTTATAAAGTTAGTAATTTTAACTATATCATTTGATACATT  
ATTAGGATGTTTAAAGTGAATAAAAAGTCGTAAATTTAATTCAGTTTTGGAAATAGATGGAGGAATCAGAAAAGTAGCAATGATAGCATG  
TATATTTTTTTTTATCAGTAGTTGACATTCTTACAAAGTTTAACTTTTTATTTATGTTACCACAAGATTGTATCAATTTTTTAAAGACTAAA  
ACATCTTGGAAATATCTGAATTTTTCTCTATTTTATTTATTTTATATGAAAGTGAAGTATATAAAAAATATGTGCTTATGTGGATTACC  
AGTACCTAAGAGATTAAGGAAAAAATAGCAGTTTTACTAGATGCAATGACAGATGAAATGAATGCTAAGGATGAAAAGTAACTACTGGT  
AGATATAATAAAGATATTAACAAAATAAAAAGTGTATCCAAAATAAGAATAGCTGAAAGTTATCATAATTCATGAACTGATAATGAAAAC  
GAGGGAGCAGATGCCAAGAGACACACAAGTATTAATACATATAATTTTTCGAAGCAAGTGTTTACTACTATATGGATGACAAGGTAGTATA  
TCAAAACATTGGTTCACAAAGATGGTGCATGGTCAGTTGGTAAAACTATTAAGCTACATTAGTTACAGATATCACAAACTATAAATAGTTA  
AACATAGAAATATGTGTAATTTGTGATGGAATTTATTCAAAAACACAAAAATACGTGATGAAGGACAAAATGATAGAGAAAAAAGTATC  
AAACCTTAATAAATGATTTAATTTGATAGTTTAAAAGTTATAGGAAAAATATATAAAGAAATAAAAACATTAAAAAAATATAAGATATGTT  
TACAAATTACTATCAGACAATCTCCTTATCTAATAGAAGAGTCAATTAACATAATTGAGTATCTTTAAATTGAAATGTTAGGAAGTGATTT  
AAATATGAAAACCTAAATTATAAAAAATCAATATTAATTTATTTTTAAAAAATAGAAAGGAGTGTATAAGATTTATTTTCAAAGTTTAAA  
AAAAAGAAAATCAATTTAAATTTTTCAGAAGGAATAAATGTGGTTATAGAAGTGGATTTATTATCAAAAATAATAACTAGGAGGTTTTT

>DSM-29754

ATAAAAATATGTTAAATATATCCTCTTATACTTAAATATATAAAAAATAAACAAAATGATACACTACATAAAAGTGTCTATCTAATATGAA  
GATTTACCAATAAAAAGGTGGACTATGATGAATGCACAGTAGTTCACCTTTTTATATTTCTAATGGTAACAAAATATTTTTTATATAAAA  
CCTAGGAGGCGTTATGAATATGACAATATCTTTTTTATCAGAGCATATATTTATAAAGTTAGTAATTTTAACTATATCATTTGATACATT  
ATTAGGATGTTTAAAGTGAATAAAAAGTCGTAAATTTAATTCAGTTTTGGAAATAGATGGAGGAATCAGAAAAGTAGCAATGATAGCATG  
TATATTTTTTTTTATCAGTAGTTGACATTCTTACAAAGTTTAACTTTTTATTTATGTTACCACAAGATTGTATCAATTTTTTAAAGACTAAA  
ACATCTTGGAAATATCTGAATTTTTCTCTATTTTATTTATTTTATATGAAAGTGAAGTATATAAAAAATATGTGCTTATGTGGATTACC  
AGTACCTAAGAGATTAAGGAAAAAATAGCAATTTTACTAGATGCAATGACAGATGAAATGAATGCTAAGGATGAAAAGTAACTAAATGGT  
AGATATAATAAAGATATTAACAAAATAAAAAGTGTATCCAAAATAAGAATAGCTGAAAGTTATCATAATTCATGAACTAATAATGAAAAC  
GAGGGAGCAGATGCCAAGAGACACACAAGTATTAATACATATAATTTTTCGAAGCAAGTGTTTACTACTATATAGATGACAAGGTAGTATA  
TCAAAACATTGGTTCACAAAGATGGTGCATGGTCAGTTGGTAAAACTATTAAGCTACATTAGTTACAGATATCACAAACTATAAATAGTTA  
AACATAGAAATATGTGTAATTTGTGATGGAATTTATTCAAAAACACAAAAATACGTGATGAAGGACAAAATGATATAGAAAAAAGTATC  
AAACCTTAATAAATGATTTAATTTGATAGTTTAAAAGTTATAGGAAAAATATATAAAGAAATAAAAACATTAAAAAAATATAAGATATGTT  
TACAAATTACTATCAGACAATCTCCTTATCTAATAGAAGAGTCAATTAACATAATTGAGTATCTTTAAATTGAAATGTTAGGAAGTGATTT  
AAATATGAAAACCTAAATTATAAAAAATCAATATTAATTTATTTTTAAAAAATAGAAAGGAGTGTATAAGATTTATTTTCAAAGTTTAAA  
AACAAAGAAAATCAATTTAAATTTTTCAGAAGGAATAAATGTGGTTATAGAAGTGGATTTATTATCAAAAATAATAACTAGGAGGTTTTT

>DSM-29756

ATAAAAATATGTTAAATATATCCTCTTATACTTAAATATATAAAAAATAAACAAAATGATACACTACATAAAAGTGTCTATCTAATATGAA  
GATTTACCAATAAAAAGGTGGACTATGATGAATGCACAGTAGTTCACCTTTTTATATTTCTAATGGTAACAAAATATTTTTTATATAAAA  
CCTAGGAGGCGTTATGAATATGACAATATCTTTTTTATCAGAGCATATATTTATAAAGTTAGTAATTTTAACTATATCATTTGATACATT  
ATTAGGATGTTTAAAGTGAATAAAAAGTCGTAAATTTAATTCAGTTTTGGAAATAGATGGAGGAATCAGAAAAGTAGCAATGATAGCATG  
TATATTTTTTTTTATCAGTAGTTGACATTCTTACAAAGTTTAACTTTTTATTTATGTTACCACAAGATTGTATCAATTTTTTAAAGACTAAA  
ACATCTTGGAAATATCTGAATTTTTCTCTATTTTATTTATTTTATATGAAAGTGAAGTATATAAAAAATATGTGCTTATGTGGATTACC  
AGTACCTAAGAGATTAAGGAAAAAATAGCAATTTTACTAGATGCAATGACAGATGAAATGAATGCTAAGGATGAAAAGTAACTAAATGGT  
AGATATAATAAAGATATTAACAAAATAAAAAGTGTATCCAAAATAAGAATAGCTGAAAGTTATCATAATTCATGAACTAATAATGAAAAC  
GAGGGAGCAGATGCCAAGAGACACACAAGTATTAATACATATAATTTTTCGAAGCAAGTGTTTACTACTATATAGATGACAAGGTAGTATA  
TCAAAACATTGGTTCACAAAGATGGTGCATGGTCAGTTGGTAAAACTATTAAGCTACATTAGTTACAGATATCACAAACTATAAATAGTTA  
AACATAGAAATATGTGTAATTTGTGATTGAAATTTATTCAAAAACACAAAAATACGTGATGAAGGACAAAATGATATAGAAAAAAGTATC  
AAACCTTAATAAATGATTTAATTTGATAGTTTAAAAGTTATAGGAAAAATATATAAAGAAATAAAAACATTAAAAAAATATAAGATATGTT  
TACAAATTACTATCAGACAATCTCCTTATCTAATAGAAGAGTCAATTAACATAATTGAGTATCTTTAAATTGAAATGTTAGGAAGTGATTT  
AAATATGAAAACCTAAATTATAAAAAATCAATATTAATTTATTTTTAAAAAATAGAAAGGAGTGTATAAGATTTATTTTCAAAGTTTAAA  
AACAAAGAAAATCAATTTAAATTTTTCAGAAGGAATAAATGTGGTTATAGAAGTGGATTTATTATCAAAAATAATAACTAGGAGGTTTTT

&gt;DSM-29094

ATAAAAATATGTTAAATATATCCTCTTATACTTAAATATATAAAAAATAACAAAATGATACACTACATAAAAGTGTCTATCTAATATGAA  
 GATTTACCAATAAAAAGGTGGACTATGATGAATGCACAGTAGTTCACCTTTTTATATTTCTAATGGTAACAAAATATTTTTTATATAAAA  
 CCTAGGAGGCGTTATGAATATGACAATATCTTTTTTATCAGAGCATATATTTATAAAGTTAGTAATTTTAACTATATCATTGATACATT  
 ATTAGGATGTTTAAAGTGAATAAAAAGTCGTAATTTAATTTCTAGTTTTGGAAATAGATGGAGGAATCAGAAAAGTAGCAATGATAGCATG  
 TATATTTTTTTTTATCAGTAGTTGACATTCCTTACAAAGTTTAACTTTTTATTATGTTACCACAAGATTGTATCAATTTTTTAAAGACTAAA  
 ACATCTTGGAAATATCTGAATTTTTCTCTATTTTTATTTATTTTATATGAAAGTGTAAAGTATATTAATAAATATGTGCTTATGTGGATTACC  
 AGTACCTAAGAGATTAAGGAAAAAATAGCAATTTTACTAGATGCAATGACAGATGAAATGAATGCTAAGGATGAAAAGTAAAGTAAATGGT  
 AGATATAATAAAGATATTAACAAATAAAAAGTGTATCCAAATAAGAATAGCTGAAAGTTATCATAATTCATGAAACTAATAATGAAAAC  
 GAGGGAGCAGATGCCAAGAGACACACAAGTATTAATAACATATAATTTTGAAGCAAGTGTTCATTACTATATAGATGACAAGGTAGTATA  
 TCAAAACATTGGTTCACAAAGATGGTGCATGGTCAGTTGGTAAAACTATTAAGCTACATTAGTTACAGATATCACAAACTATAATAGTTA  
 AACATAGAAATATGTGTAATTTGTGATTGAAATTAATTCAAAAACACAAAAATACGTGATGAAGGACAAAATGATATAGAAAAAAGTATC  
 AAACCTTAATAAATGATTTAATGATAGTTTTAAAAGTTATAGGAAAAATATAAAGAAATAAAAACATTAATAAATATAAGATATGTT  
 TACAAATTACTATCAGACAATCTCCTTATCTAATAGAAGAGTCAATTAACATAATTGAGTATCTTTAAATGAAATGTTAGGAAGTGATTT  
 AAATATGAAAACCTAAATTTAAAAAATCAATATTAATTTATTTTTAAAAAATAGAAAGGAGTGTATAAGATTTATTTTCAAAGTTTAAA  
 AACAAGAAAATCAATTTAAATTTTCAAGAAGGAATAAATGTGGTTATAGAAGTGGATTTATTATCAAAAATAATAACTAGGAGGTTTTT

&gt;M120

ATAAAAATATGTTAAATATATCCTCTTATACTTAAATATATAAAAAATAACAAAATGATACACTACATAAAAGTGTCTATCTAATATGAA  
 GATTTACCAATAAAAAGGTGAACTATGATGAATTCACAGTAGTTCACCTTTTTATATTTCTAATGGTAACAAAATATTTTTTATATAAAA  
 CCTAGGAGGCGTTATGAATATGACAATATCTTTTTTATCAGAGCATATATTTATAAAGTTAGTAATTTTAACTATATCATTGATACATT  
 ATTAGGATGTTTAAAGTGAATAAAAAGTCGTAATTTAATTTCTAGTTTTGGAAATAGATGGAGGAATCAGAAAAGTAGCAATGATAGCATG  
 TATATTTTTTTTTATCAGTAGTTGACATTCCTTACAAAGTTTAACTTTTTATTATGTTACCACAAGATTGTATCAATTTTTTAAAGACTAAA  
 ACATCTTGGAAATATCTGAATTTTTCTCTATTTTTATTTATTTTATATGAAAGTGTAAAGTATATTAATAAATATGTGCTTATGTGGATTACC  
 AGTACCTAAGAGATTAAGGAAAAAATAGCAGTTTTTACTAGATGCAATGACAGATGAAATGAATGCTAAGGATGAAAAGTAAAGTACTGGT  
 AGATATAATAAAGATATTAACAAATAAAAAGTGTATCCAAATAAGAATAGCTGAAAGTTATCATAATTCATGAAACTGATAATGAAAAC  
 GAGGGAGCAGATGCCAAGAGACACACAAGTATTAATAACATATAATTTTGAAGCAAGTGTTCATTACTATATGGATGACAAGGTAGTATA  
 TCAAAACATTGGTTCACAAAGATGGTGCATGGTCAGTTGGTAAAACTATTAAGCTACATTAGTTACAGATATCACAAACTATAATAGTTA  
 AACATAGAAATATGTGTAATTTGTGATGGAATTAATTCAAAAACACAAAAATACGTGATGAAGGACAAAATGATAGAGAAAAAAGTATC  
 AAACCTTAATAAATGATTTAATGATAGTTTTAAAAGTTATAGGAAAAATATAAAGAAATAAAAACATTAATAAATATAAGATATGTT  
 TACAAATTACTATCAGACAATCTCCTTATCTAATAGAAGAGTCAATTAACATAATTGAGTATCTTTAAATGAAATGTTAGGAAGTGATTT  
 AAATATGAAAACCTAAATTTAAAAAATCAATATTAATTTATTTTTAAAAAATAGAAAGGAGTGTATAAGATTTATTTTCAAAGTTTAAA  
 AAAAAAGAAAATCAATTTAAATTTTCAAGAAGGAATAAATGTGGTTATAGAAGTGGATTTATTATCAAAAATAATAACTAGGAGGTTTTT

&gt;R20291

ATAAAAATACGTTAAATATATCCTCTTATACTTAAATATATAAAAAATAACAAAATGATACACTACATAAAAGTGTCTATCTAATATGAA  
 GATTTACCAATAAAAAGGTGAACTATGATGAATGCACAGTAGTTCACCTTTTTATATTTCTAATGGTAACAAAATATTTTTTATATAAAA  
 CCTAGGAGGCGTTATGAATATGACAATATCTTTTTTATCAGAGCATATATTTATAAAGTTAGTAATTTTAACTATATCATTGATACATT  
 ATTAGGATGTTTAAAGTGAATAAAAAGTCGTAATTTAATTTCTAGTTTTGGAAATAGATGGAGGAATCAGAAAAGTAGCAATGATAGCATG  
 TATATTTTTTTTTATCAGTAGTTGACATTCCTTACAAAGTTTAACTTTTTATTATGTTACCACAAGATTGTATCAATTTTTTAAAGACTAAA  
 ACATCTTGGAAATATCTGAATTTTTCTCTATTTTTATTTATTTTATATGAAAGTGTAAAGCATAATTAATAAATATGTGCTTATGTGGATTACC  
 AGTACCTAAGAGATTAAGGAAAAAATAGCAGTTTTTACTAGATGCAATGACAGATGAAATGAATGCTAAGGATGAAAAGTAAAGTAAATGGT  
 AGATATAATAAAAAATATTAACAAATAAAAAGTGTATCCAAATAAGAATAGCTGAAAGTTATCATAATTCATGAAACTGATAATGAAAAC  
 GAGGGAGCAGATGCCAAGAGACACACAAGTATTAATAACATATAATTTTGAAGCAAGTGTTCATTACTATATGGATGACAAGGTAGTATA  
 TCAAAACATTGGTTCACAAAGATGGTGCATGGTCAGTTGGTAAAACTATTAAGCTACATTAGTTACAGATATCACAAACTATAATAGTTA  
 AACATAGAAATATGTGTAATTTGTGATGGAATTAATTCAAAAACACAAAAATACGTGATGAAGGACAAAATGATAGAGAAAAAAGTATC  
 AAACCTTAATAAATGATTTAATGATAGTTTTAAAAGTTATAGGAAAAATATAAAGAAATAAAAACATTAATAAATATAAGATATGTT  
 TACAAATTACTATCAGACAATCTCCTTATCTAATAGAAGAGTCAATTAACATAATTGAGTATCTTTAAATGAAATGTTAGGAAGTGATTT  
 AAATATGAAAACCTAAATTTAAAAAATCAATATTAATTTATCTTTAAAAAATAGAAAGGAGTGTATAAGATTTATTTTCAAAGTTTAAA  
 AACAAGAAAATCAATTTAAATTTTCAAGAAGGAATAAATGTGGTTATAGAAGTGGATTTATTATCAAAAATAATAACTAGGAGGTTTTT



>M68

```
ATAAAAATATGTTAAATATATCCTCTTATACTTAAATATATAAAAAATAACAAAATGATACACTACATAAAAGTGTCTATCTAATATGAA
GATTTACCAATAAAAAGGTGGACTATGATGAATGCACAGTAGTTCACCTTTTTATATTTCTAATGGTAACAAAATATTTTTTATATAAAA
CCTAGGAGGCGTTATGAATATGACAATATCTTTTTTATCAGAGCATATATTTATAAAGTTAGTAATTTTAACTATATCATTTGATACATT
ATTAGGATGTTTAAAGTGAATAAAAAGTCGTAAATTTAATTCAGTTTTGGAAATAGATGGAGGAATCAGAAAAGTAGCAATGATAGCATG
TATATTTTTTTTTATCAGTAGTTGACATTCTTACAAAGTTTAACTTTTTATTTATGTTACCACAAGATTGTATCAATTTTTTAAGACTAAA
ACATCTTGGAAATATCTGAATTTTTCTCTATTTTATTTATTTTATATGAAAGTGAAGTATATAAAAAATATGTGCTTATGTGGATTACC
AGTACCTAAGAGATTAAGGAAAAAATAGCAGTTTTACTAGATGCAATGACAGATGAAATGAATGCTAAGGATGAAAAGTAAAGTAATGGT
AGATATAATAAAGATATTAACAAAATAAAAAGTGTATCCAAAATAAGAATAGCTGAAAGTTATCATAATTCATGAACTAATAATGAAAAC
GAGGGAGCAGATGCCAAGAGACACACAAGTATTAATACATATAATTTTTCGAAGCAAGTGTTCACTACTATATGGATGACAAGGTAGTATA
TCAAAACATTGGTTCACAAAGATGGTGCATGGTCAGTTGGTAAAACTATTAAGCTACATTAGTTACAGATATCACAACTATAATAGTTA
AACATAGAAATATGTGTAATTTGTGATGGAAATTAATCAAAAACACAAAAATACGTGATGAAGGACAAAATGATAGAGAAAAAAGTATC
AAACCTTAATAAATGATTTAATGATAGTTTAAAAGTTATAGGAAAAATATAAAGAAATAAAAACATTAAAAAAATATAAGATATGTT
CTATCATACAATCTCCTTATCTAATAGAAGAGTCAATTAAC TAATTGAGTATCTTTAAATTTGAAATGTTAGGAAGTATTTAAATATGAA
AACTTAAATTTAAAAAATCAATATTAATTTATTTAAAAAATAGAAAGGAGTGTATAAGATTTATTTTCAAAGTTTAAAAACAAGAAA
ATCAATTTAAATTTTTCAGAAGGAATAAATGTGGTTATAGAAGTGGATTTATTTATCAAAAATAATAACTAGGAGGTTTTT
```

>CF5

```
ATAAAAATATGTTAAATATATCCTCTTATACTTAAATATATAAAAAATAACAAAATGATACACTACATAAAAGTGTCTATCTAATATGAA
GATTTACCAATAAAAAGGTGGACTATGATGAATGCACAGTAGTTCACCTTTTTATATTTCTAATGGTAACAAAATATTTTTTATATAAAA
CCTAGGAGGCGTTATGAATATGACAATATCTTTTTTATCAGAGCATATATTTATAAAGTTAGTAATTTTAACTATATCATTTGATACATT
ATTAGGATGTTTAAAGTGAATAAAAAGTCGTAAATTTAATTCAGTTTTGGAAATAGATGGAGGAATCAGAAAAGTAGCAATGATAGCATG
TATATTTTTTTTTATCAGTAGTTGACATTCTTACAAAGTTTAACTTTTTATTTATGTTACCACAAGATTGTATCAATTTTTTAAGACTAAA
ACATCTTGGAAATATCTGAATTTTTCTCTATTTTATTTATTTTATATGAAAGTGAAGTATATAAAAAATATGTGCTTATGTGGATTACC
AGTACCTAAGAGATTAAGGAAAAAATAGCAGTTTTACTAGATGCAATGACAGATGAAATGAATGCTAAGGATGAAAAGTAAAGTAATGGT
AGATATAATAAAGATATTAACAAAATAAAAAGTGTATCCAAAATAAGAATAGCTGAAAGTTATCATAATTCATGAACTAATAATGAAAAC
GAGGGAGCAGATGCCAAGAGACACACAAGTATTAATACATATAATTTTTCGAAGCAAGTGTTCACTACTATATGGATGACAAGGTAGTATA
TCAAAACATTGGTTCACAAAGATGGTGCATGGTCAGTTGGTAAAACTATTAAGCTACATTAGTTACAGATATCACAACTATAATAGTTA
AACATAGAAATATGTGTAATTTGTGATGGAAATTAATCAAAAACACAAAAATACGTGATGAAGGACAAAATGATAGAGAAAAAAGTATC
AAACCTTAATAAATGATTTAATGATAGTTTAAAAGTTATAGGAAAAATATAAAGAAATAAAAACATTAAAAAAATATAAGATATGTT
CTATCATACAATCTCCTTATCTAATAGAAGAGTCAATTAAC TAATTGAGTATCTTTAAATTTGAAATGTTAGGAAGTATTTAAATATGAA
AACTTAAATTTAAAAAATCAATATTAATTTATTTAAAAAATAGAAAGGAGTGTATAAGATTTATTTTCAAAGTTTAAAAACAAGAAA
ATCAATTTAAATTTTTCAGAAGGAATAAATGTGGTTATAGAAGTGGATTTATTTATCAAAAATAATAACTAGGAGGTTTTT
```

### 3 REFERENCES

Reuter, J. S., and Mathews, D. H. (2010). RNAstructure: Software for RNA secondary structure prediction and analysis. *BMC bioinformatics* 11, 129. doi: 10.1186/1471-2105-11-129

Sievers, F., and Higgins, D. G. (2014). Clustal Omega, accurate alignment of very large numbers of sequences. *Methods Mol. Biol.* 1079, 105–116. doi: 10.1007/978-1-62703-646-7\_6
